# Supplementary material
Source: PubMed Central journal article supplement (PMC2587087)

SUPPORTING INFORMATION

PROTON NMR AND SELECTED CARBON NMR SPECTRA

for the  
communication  
entitled

**A Highly Stereoselective Synthesis of Chiral  $\alpha$ -Amino- $\beta$ -Lactams via the Kinugasa Reaction  
Employing Ynamides.**

authored by

Xuejun Zhang, Richard P. Hsung\*, Hongyan Li, Yu Zhang, Whiteny L. Johnson, and Ruth Figueroa

*Division of Pharmaceutical Sciences and Department of Chemistry, 7111 Rennebohm Hall, 777 Highland Avenue  
University of Wisconsin at Madison, Madison, WI 53705-2222*

**<sup>1</sup>H NMR**  
**400 MHz, CDCl<sub>3</sub>**

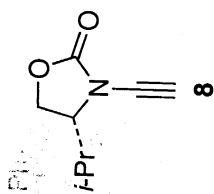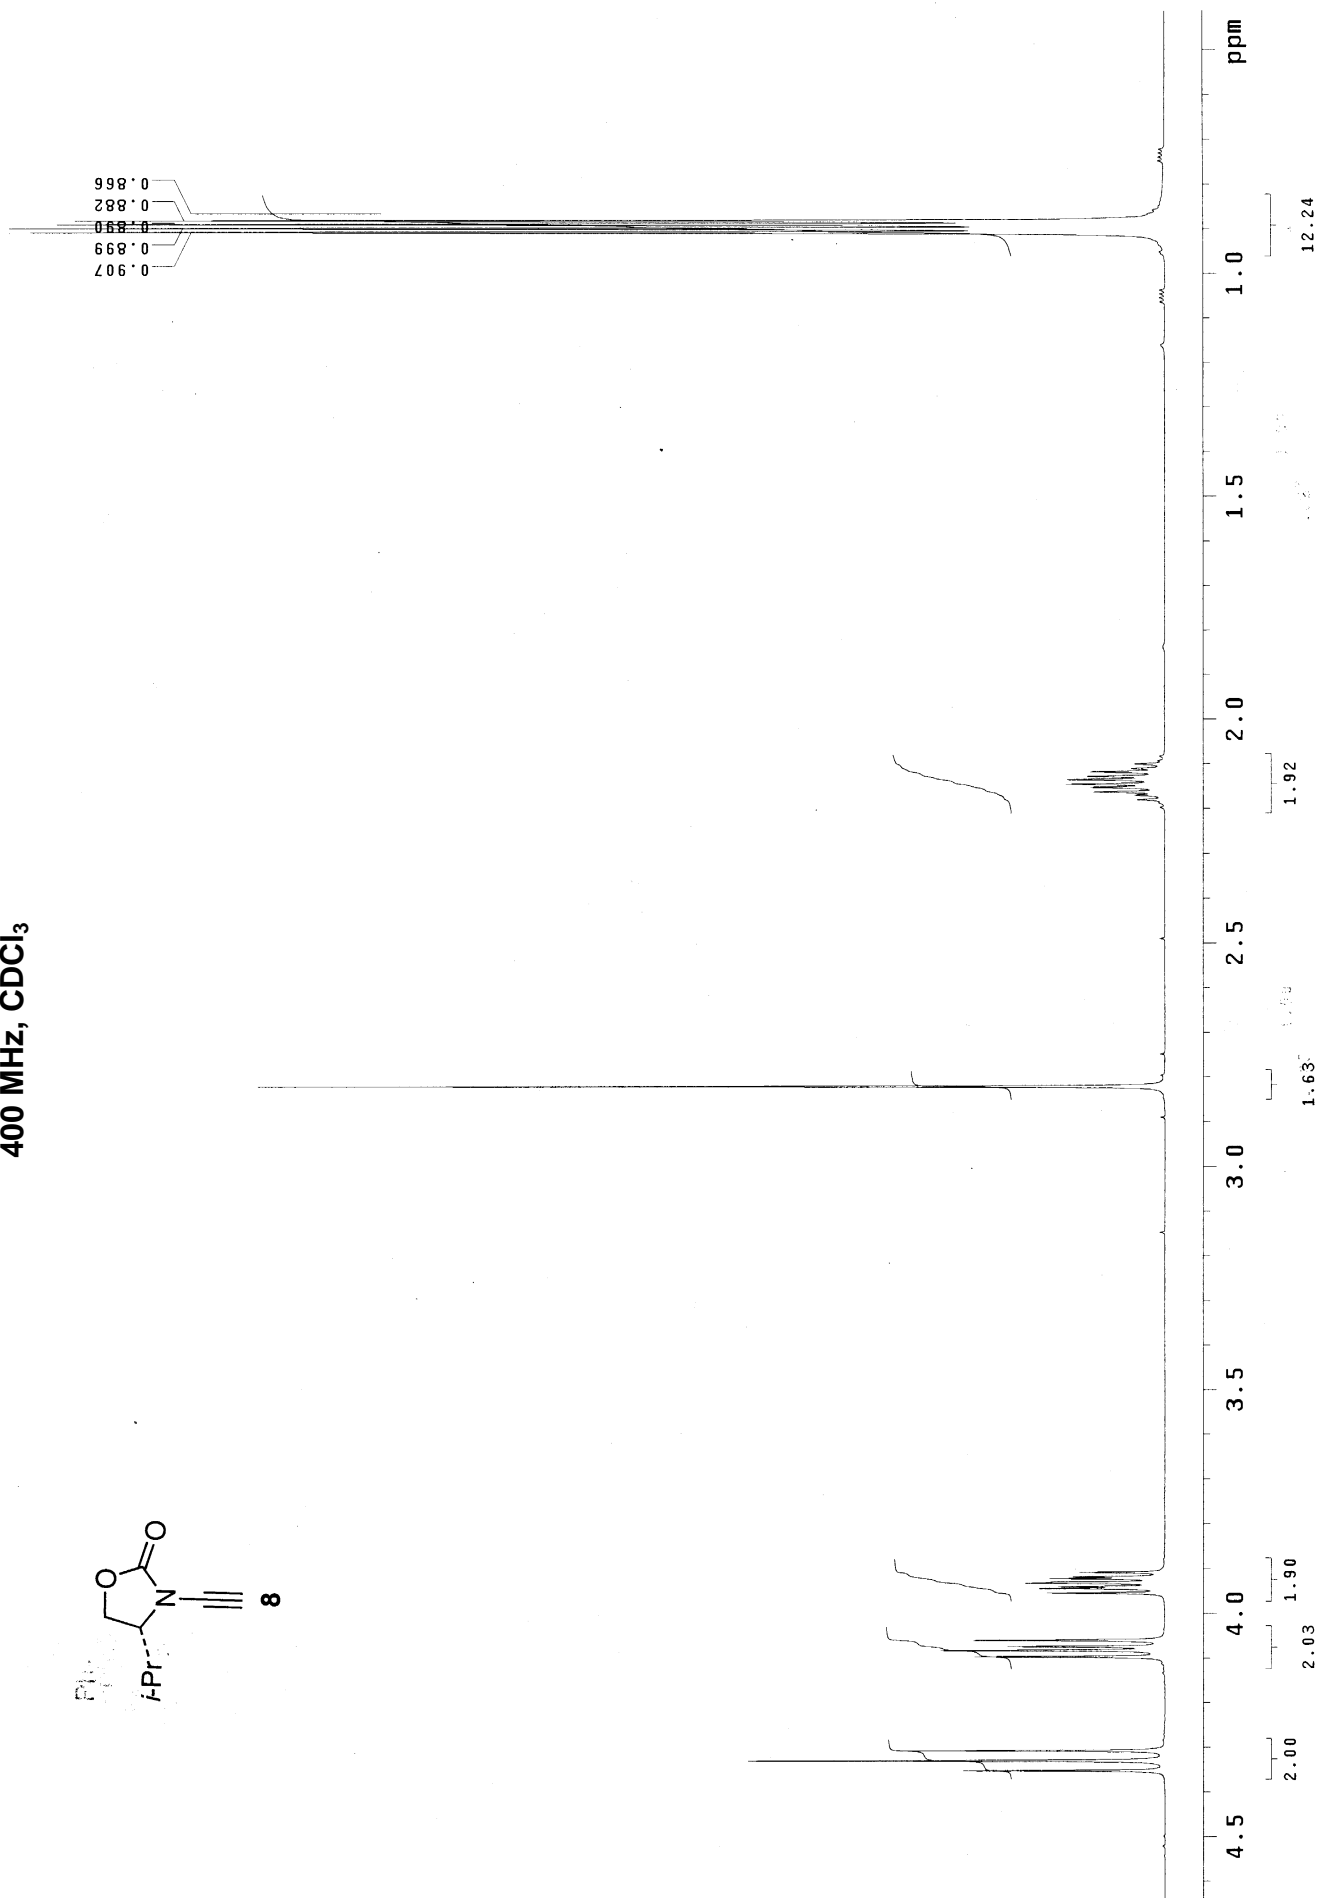

<sup>13</sup>C NMR  
100 MHz, CDCl<sub>3</sub>

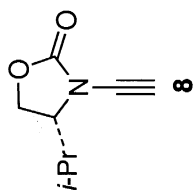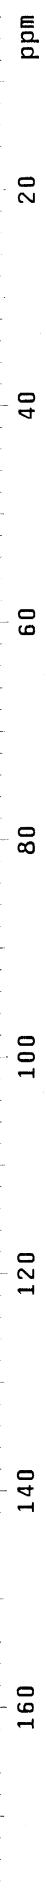

<sup>1</sup>H NMR  
400 MHz, CDCl<sub>3</sub>

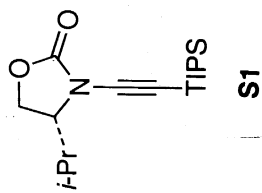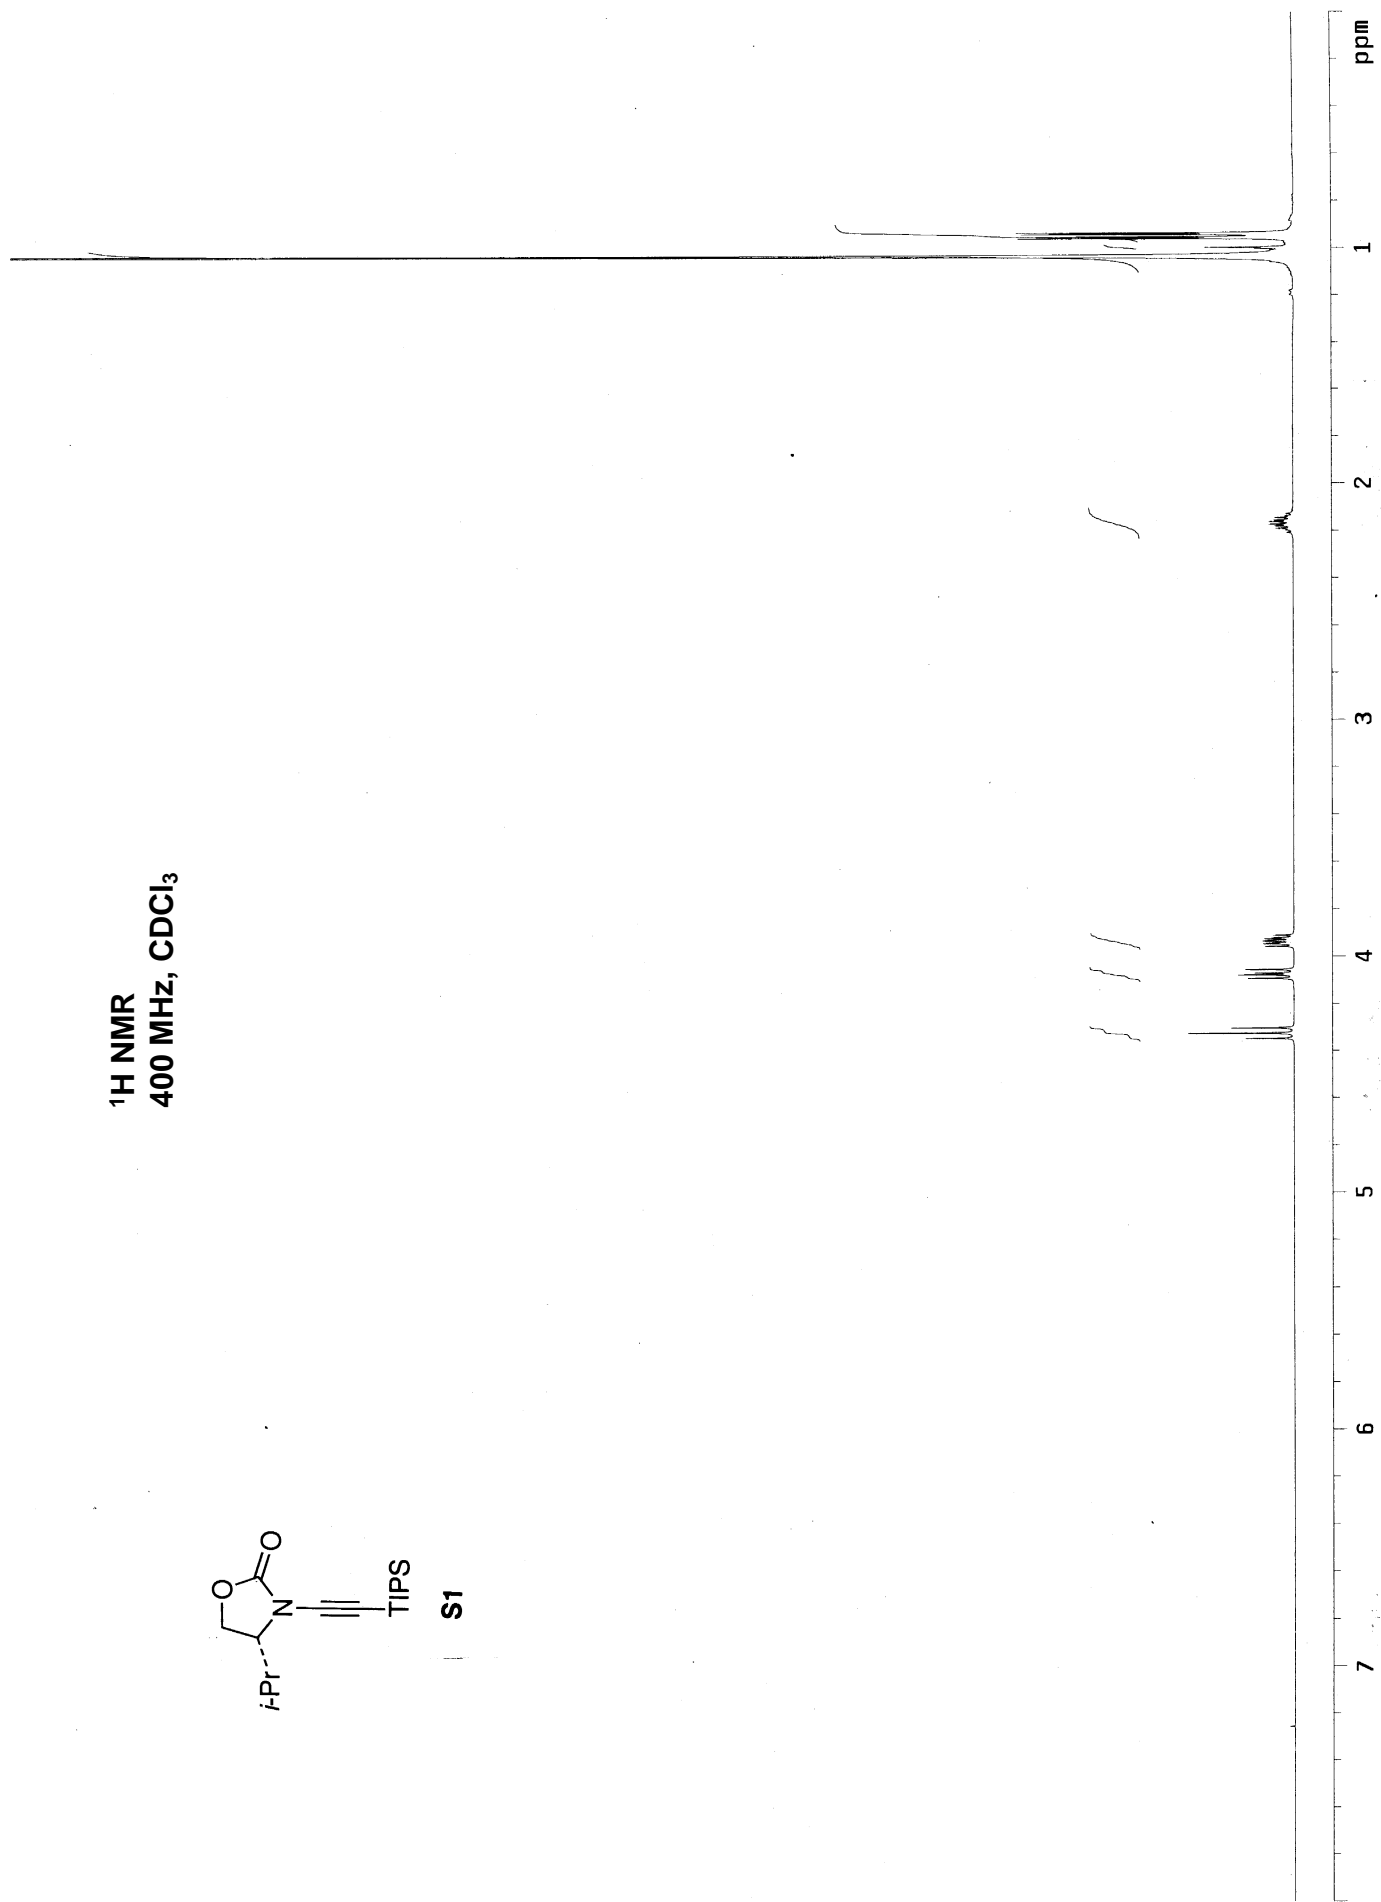

<sup>13</sup>C NMR  
100 MHz, CDCl<sub>3</sub>

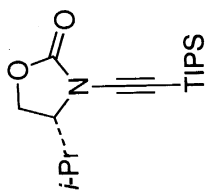

S1

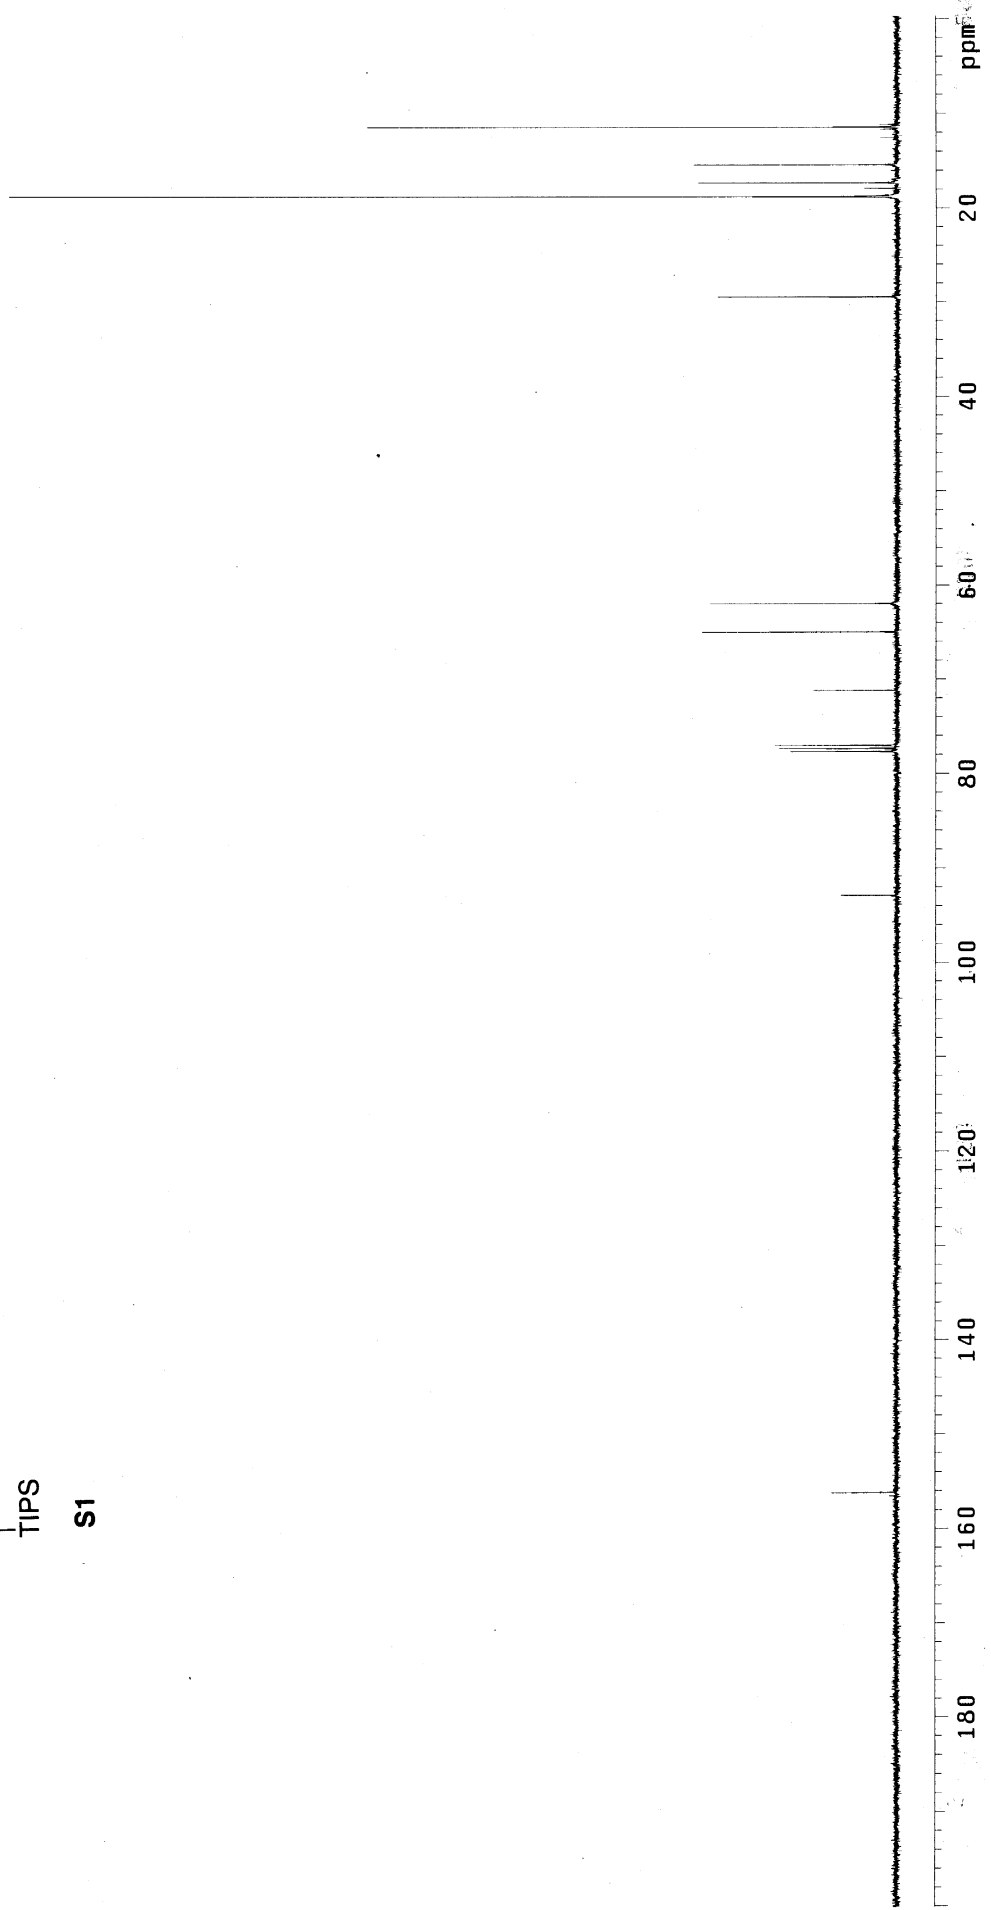

<sup>1</sup>H NMR  
400 MHz, CDCl<sub>3</sub>

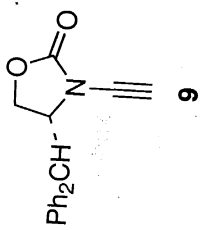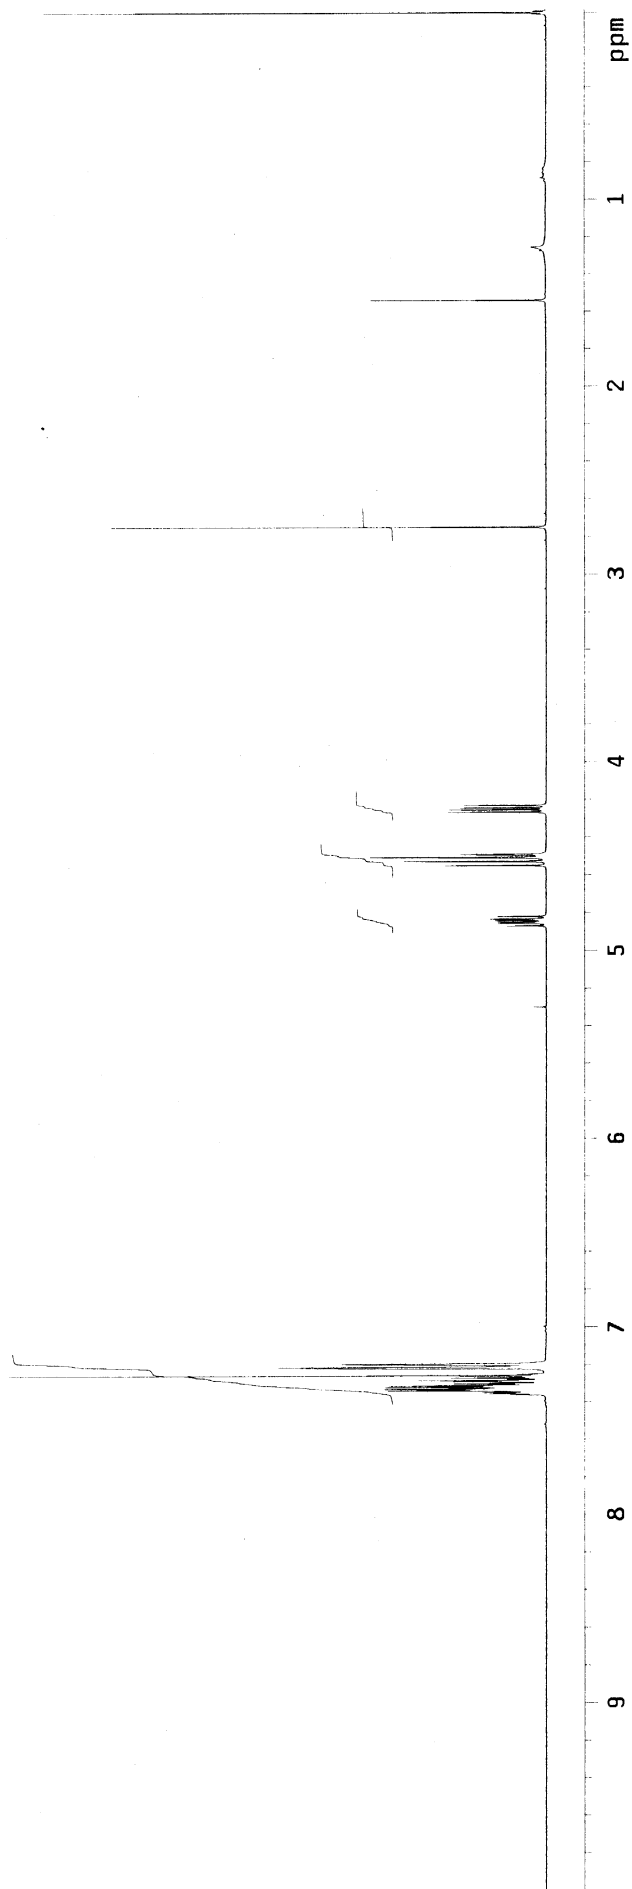

<sup>13</sup>C NMR  
100 MHz, CDCl<sub>3</sub>

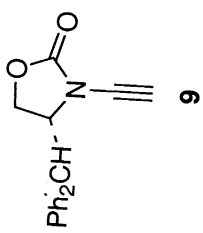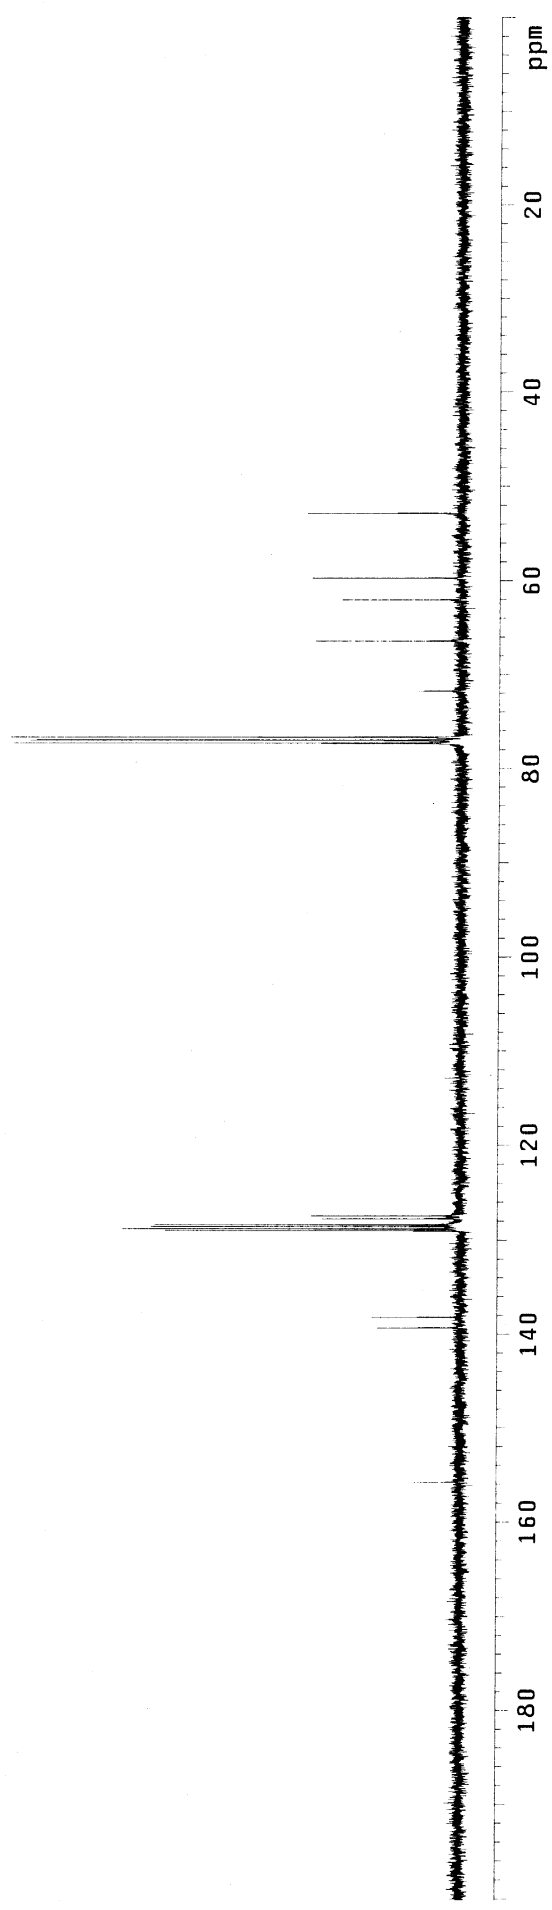

<sup>1</sup>H NMR  
400 MHz, CDCl<sub>3</sub>

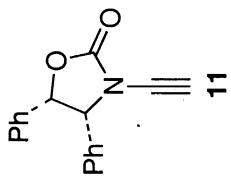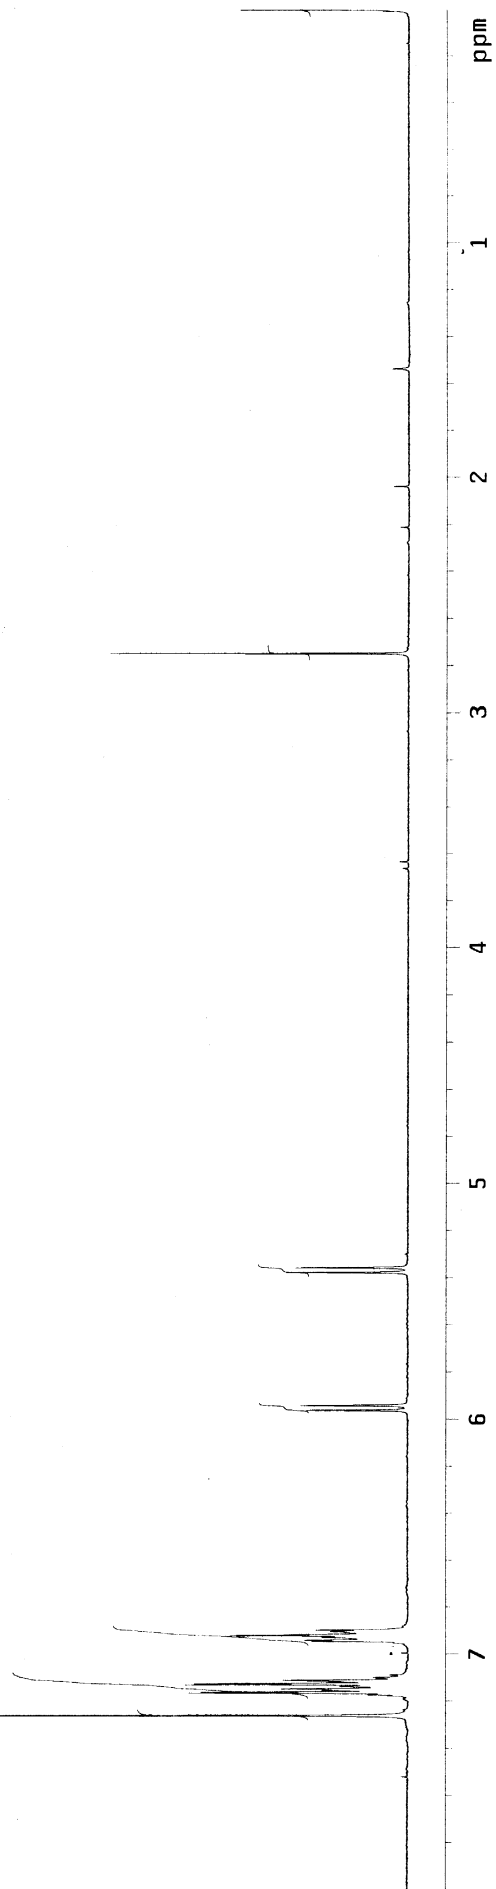



<sup>13</sup>C NMR  
100 MHz, CDCl<sub>3</sub>

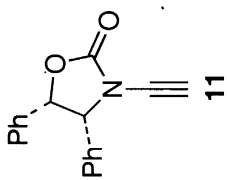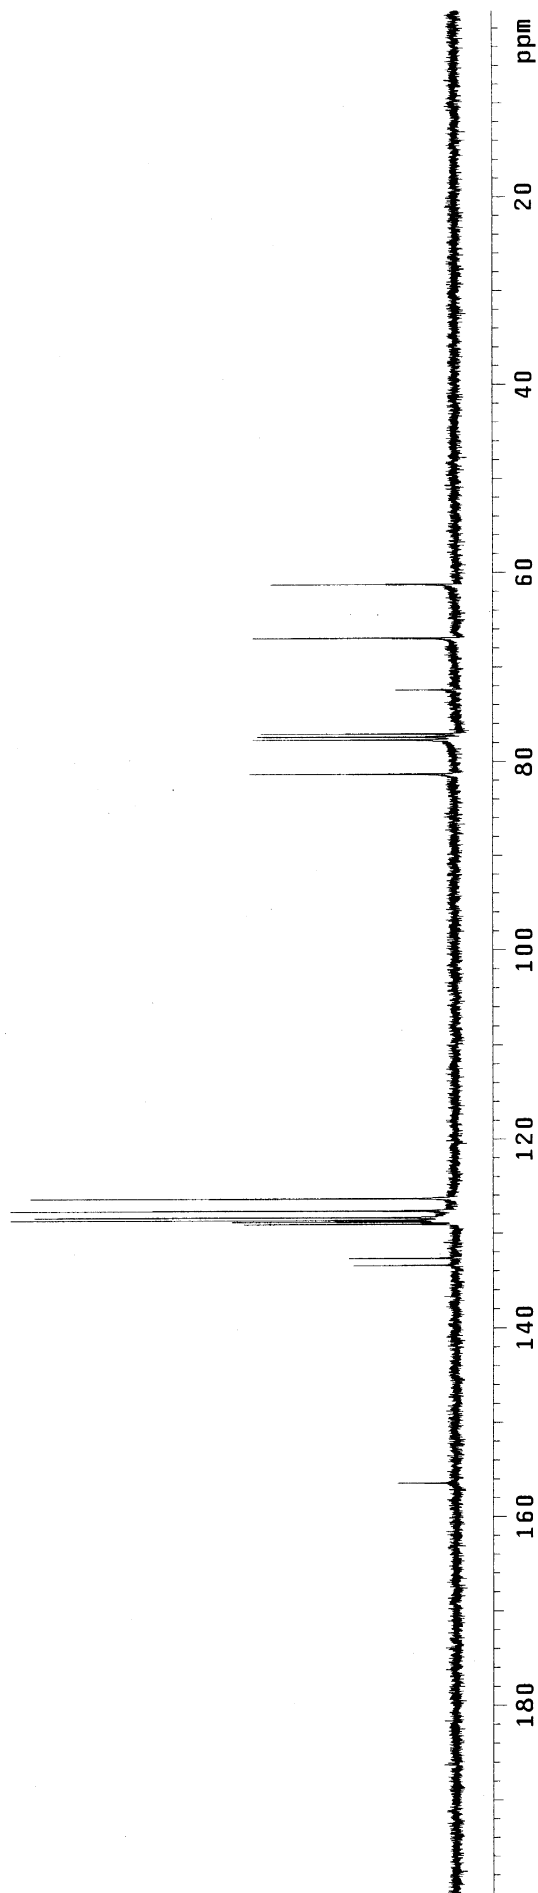

<sup>1</sup>H NMR  
400 MHz, CDCl<sub>3</sub>

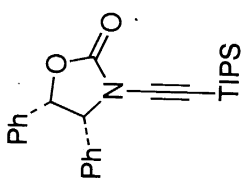

S2

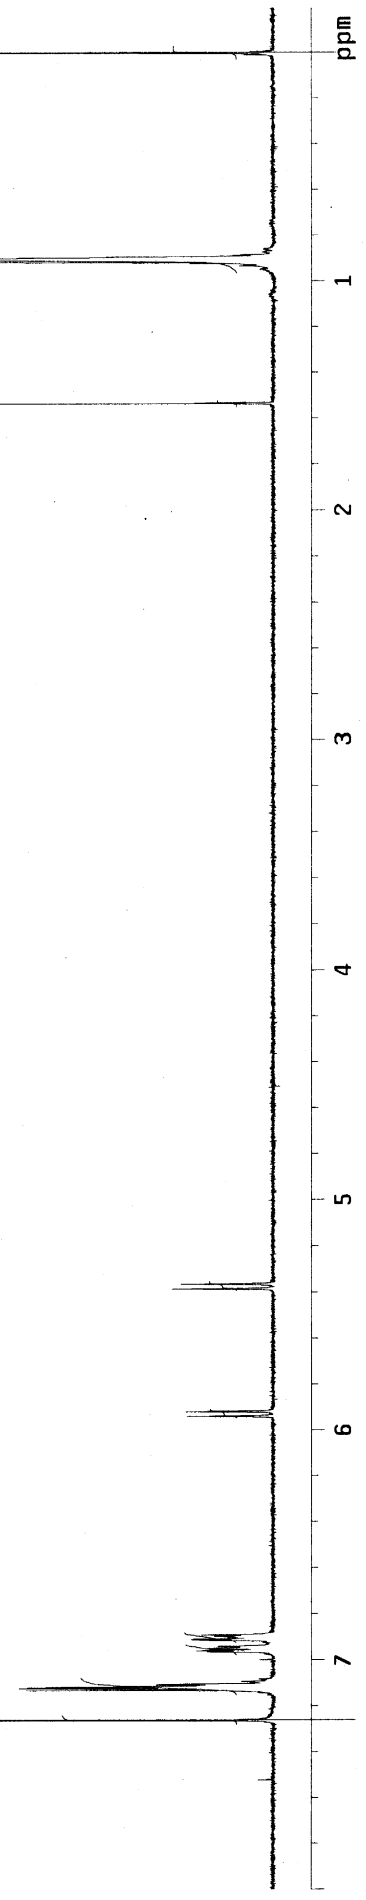

<sup>13</sup>C NMR  
100 MHz, CDCl<sub>3</sub>

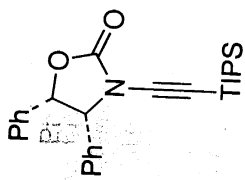

S2

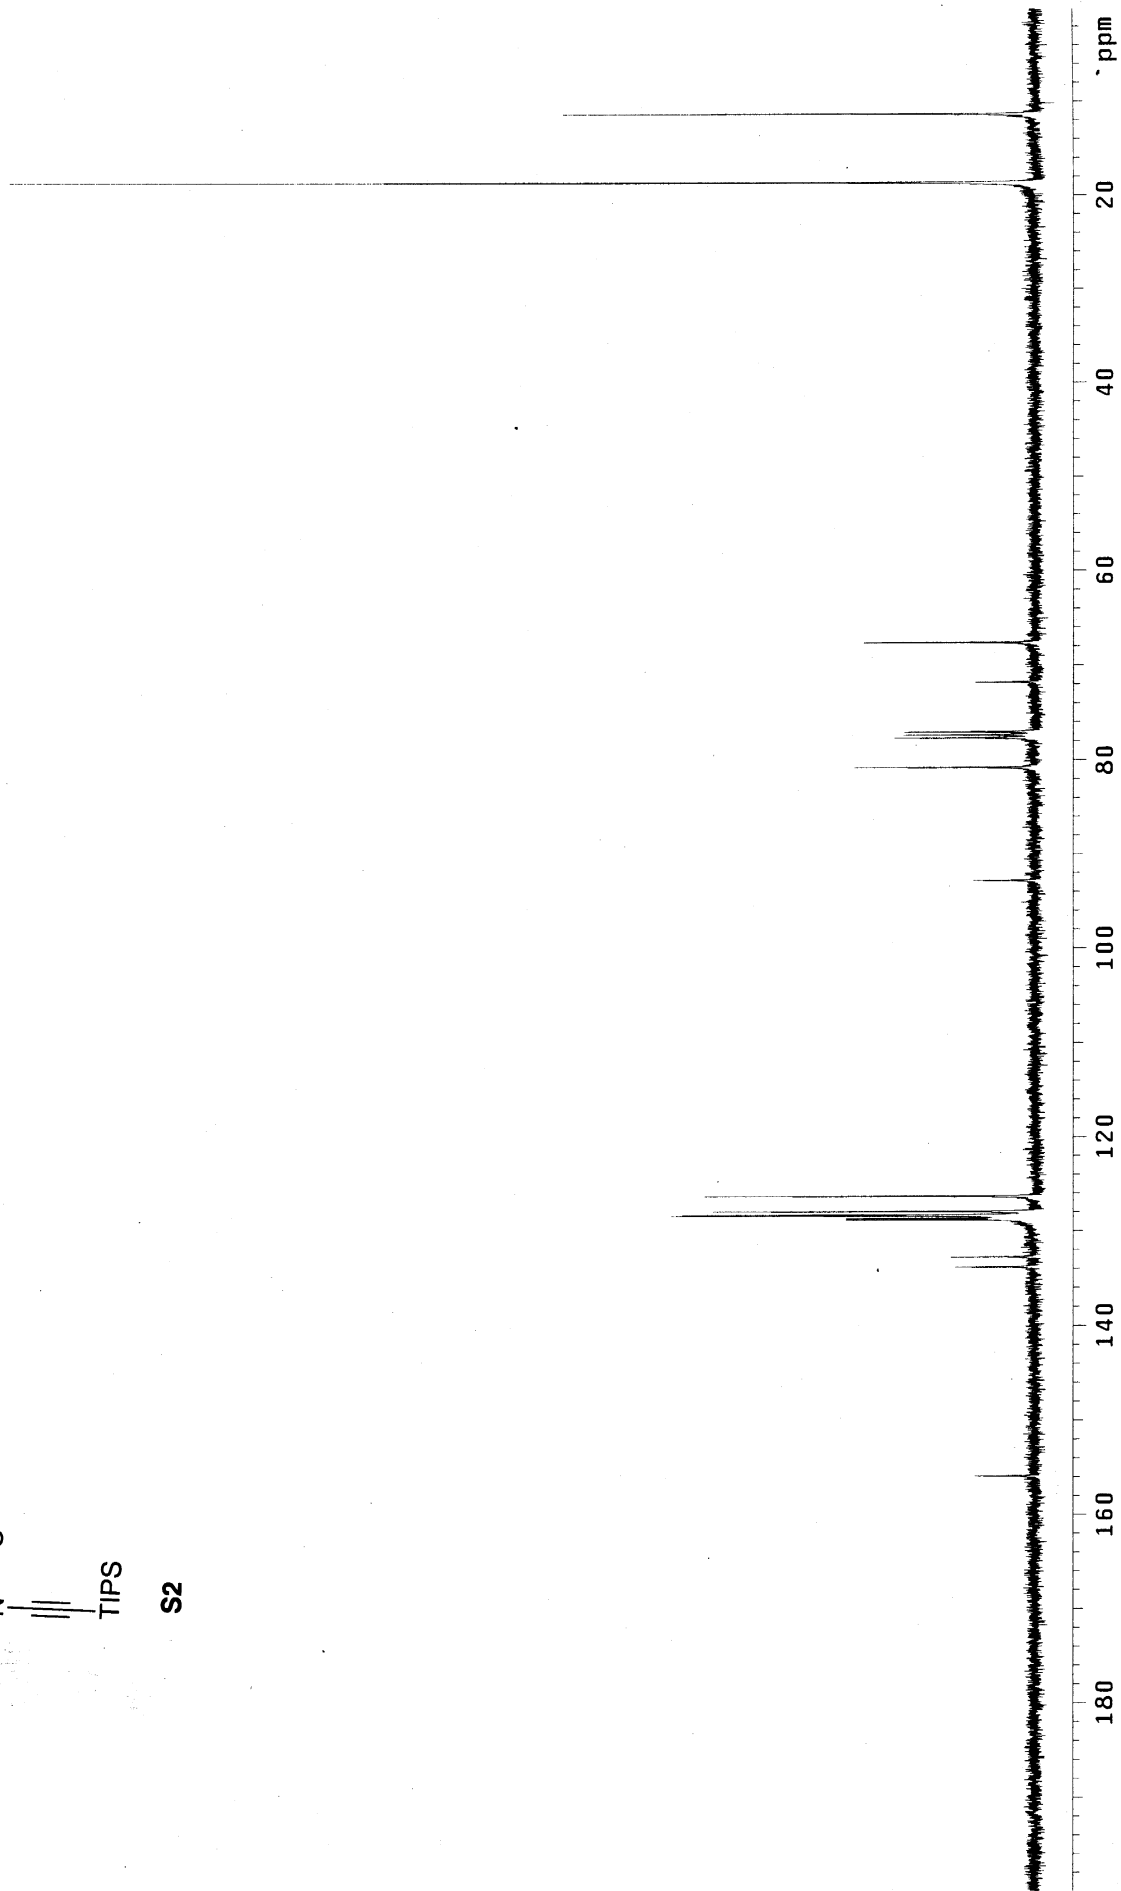

<sup>1</sup>H NMR  
400 MHz, CDCl<sub>3</sub>

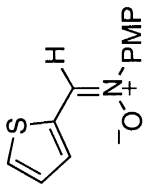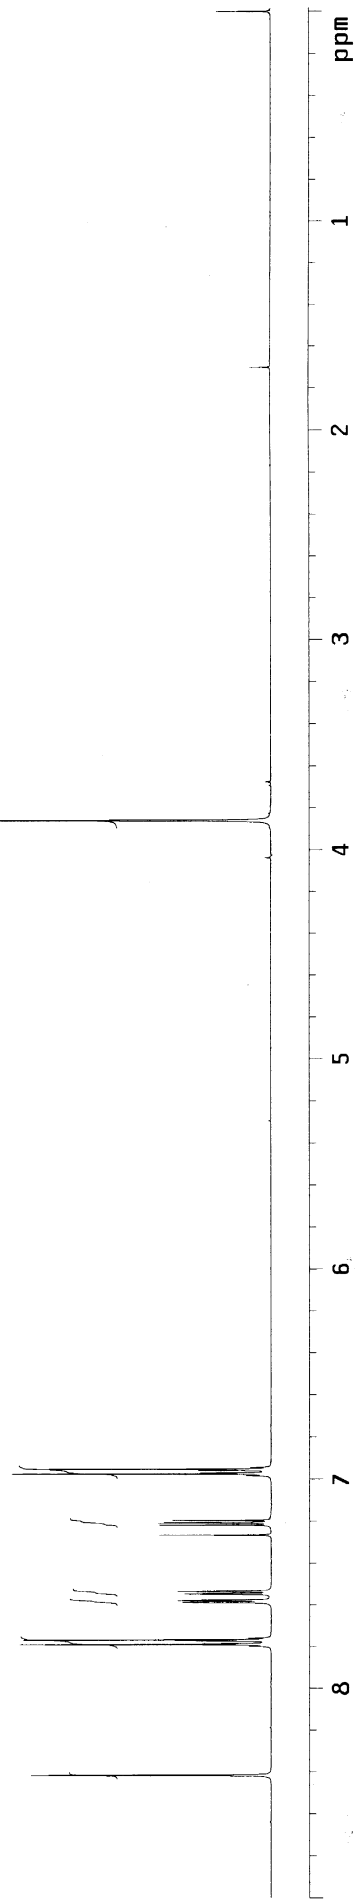

<sup>13</sup>C NMR  
100 MHz, CDCl<sub>3</sub>

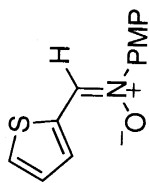

180 160 140 120 100 80 60 40 20 ppm

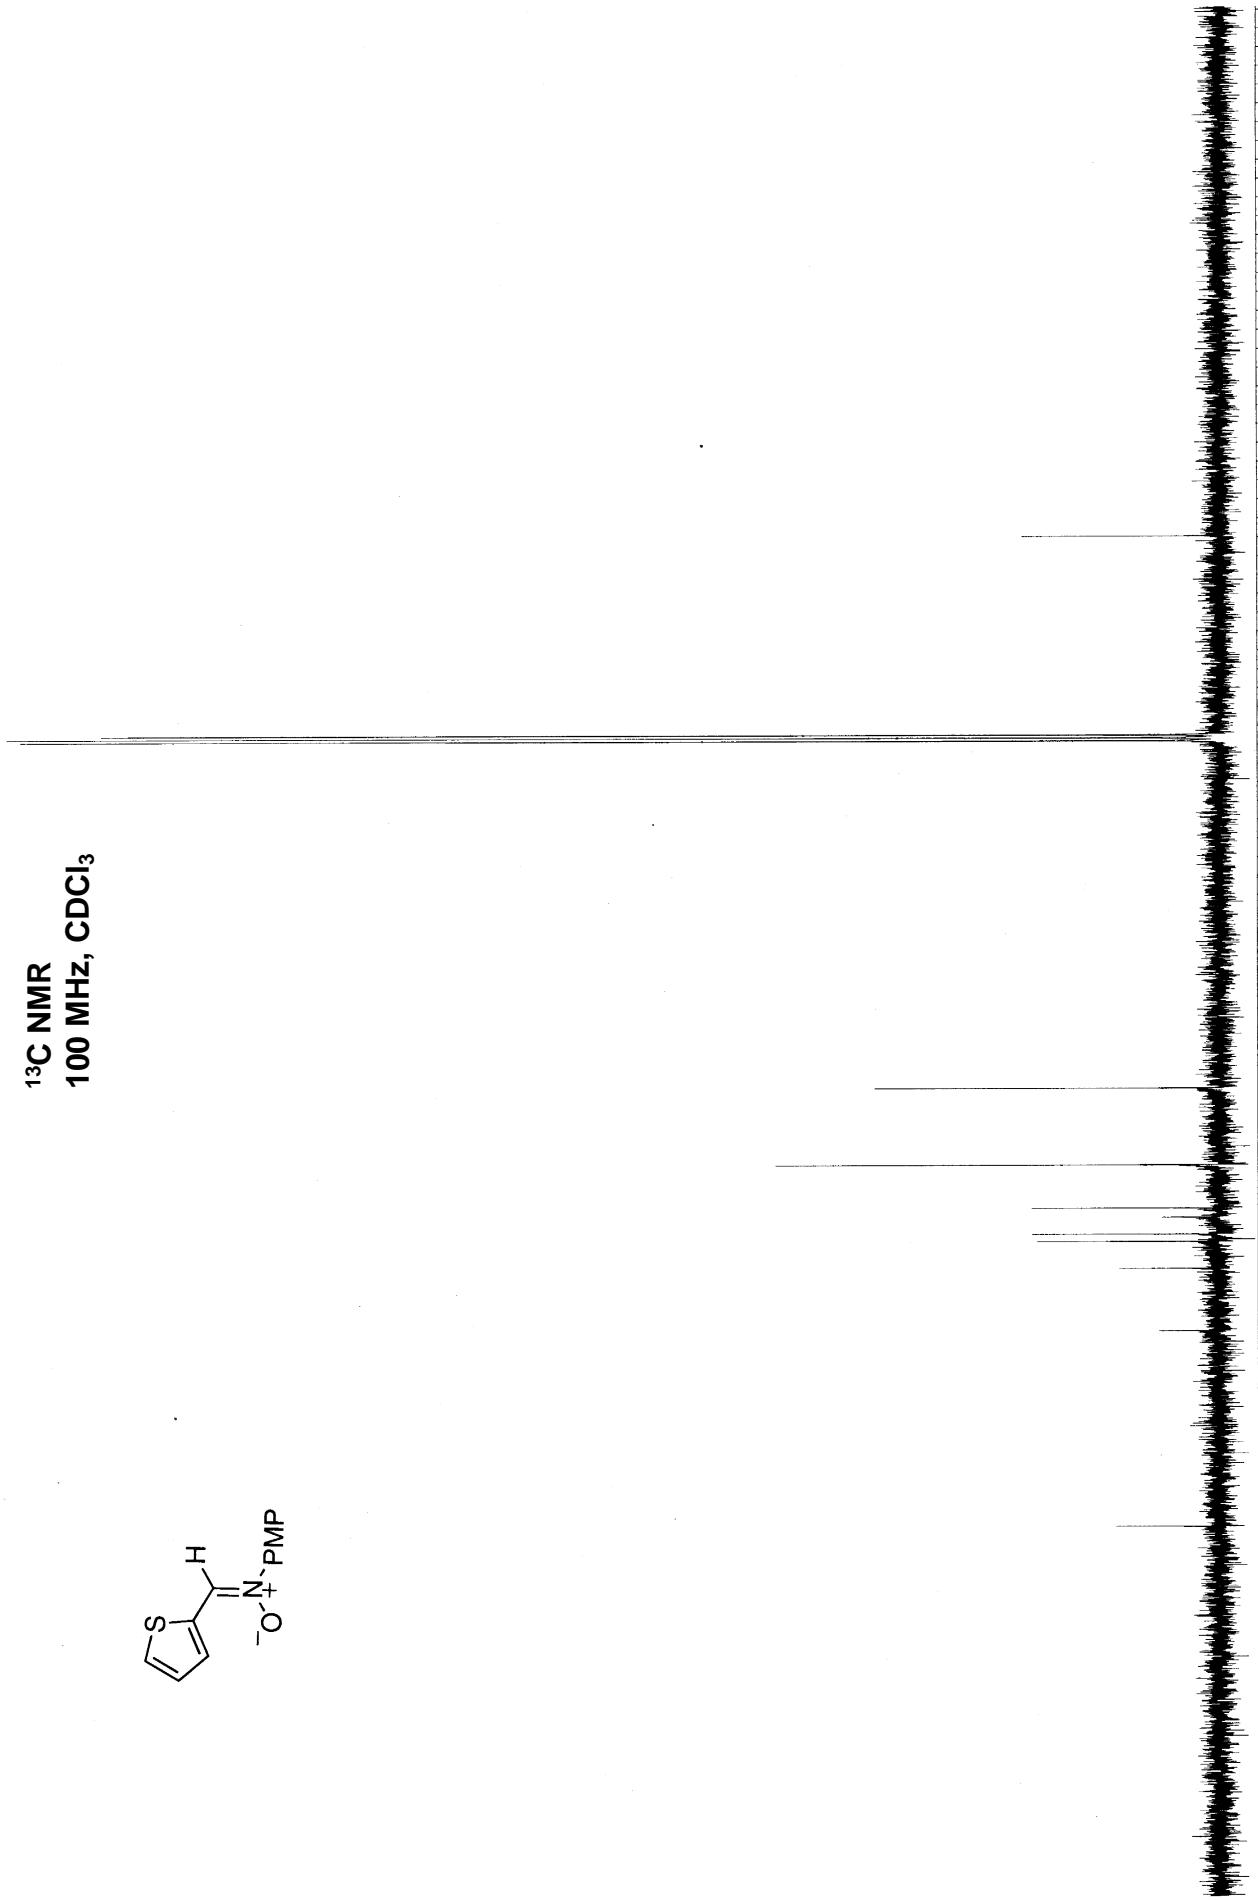

<sup>1</sup>H NMR  
400 MHz, CDCl<sub>3</sub>

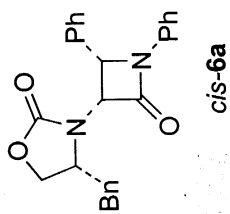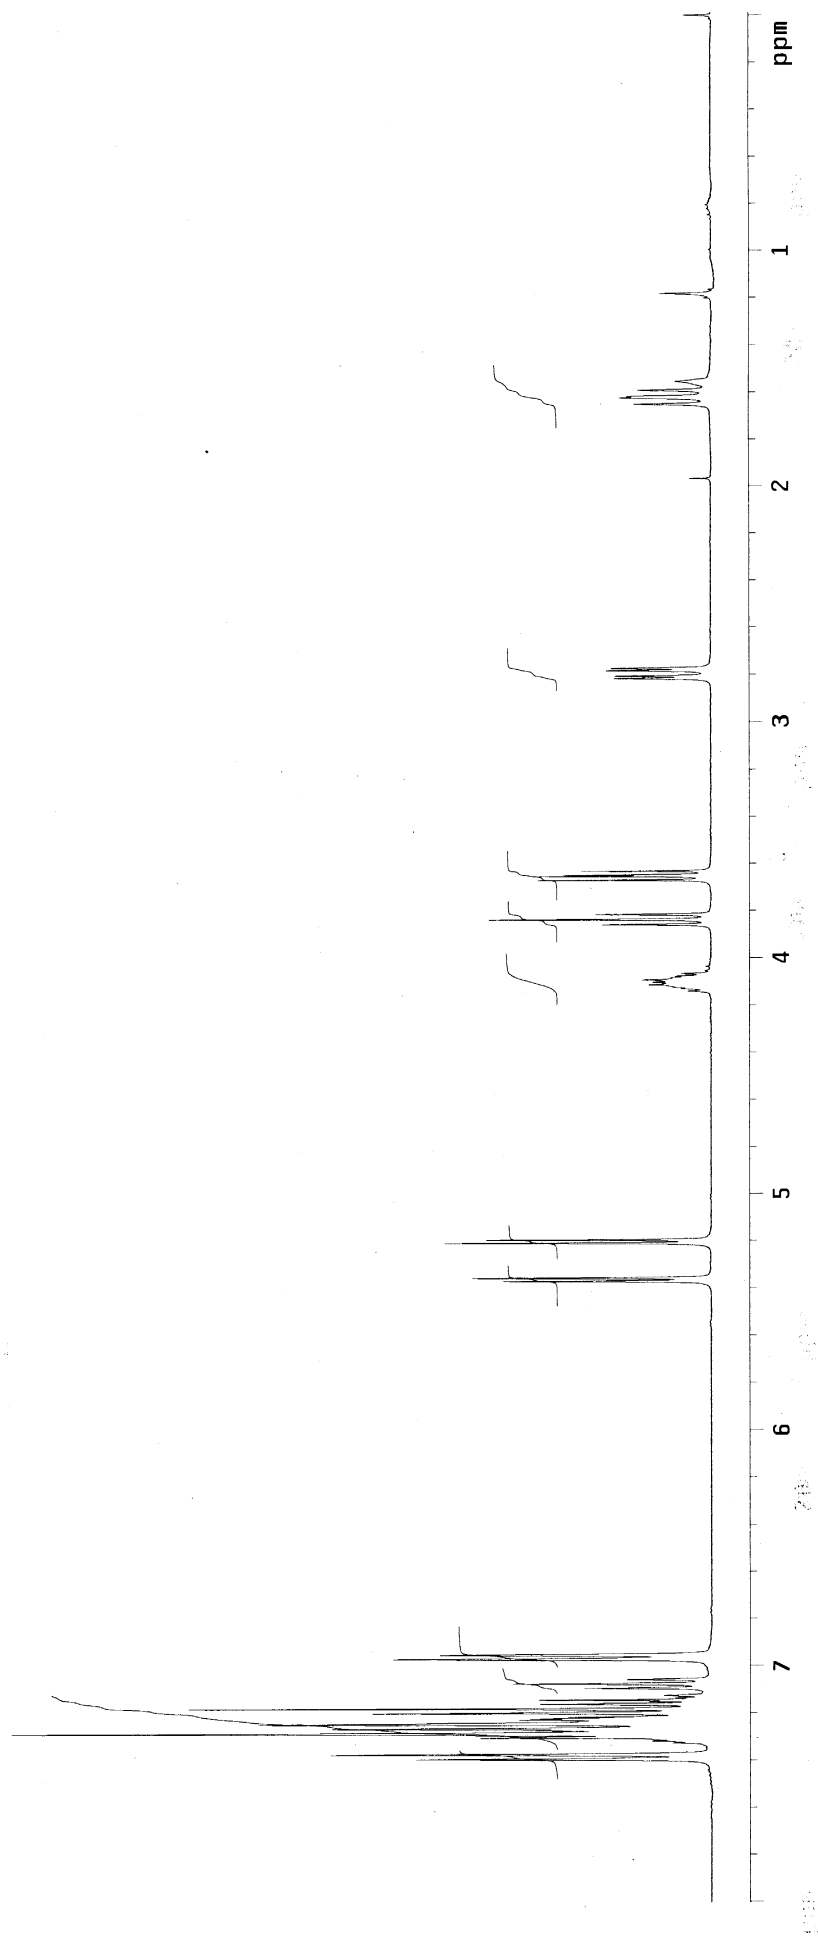

<sup>13</sup>C NMR  
100 MHz, CDCl<sub>3</sub>

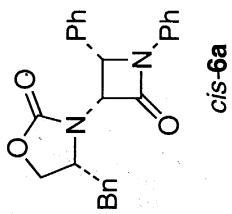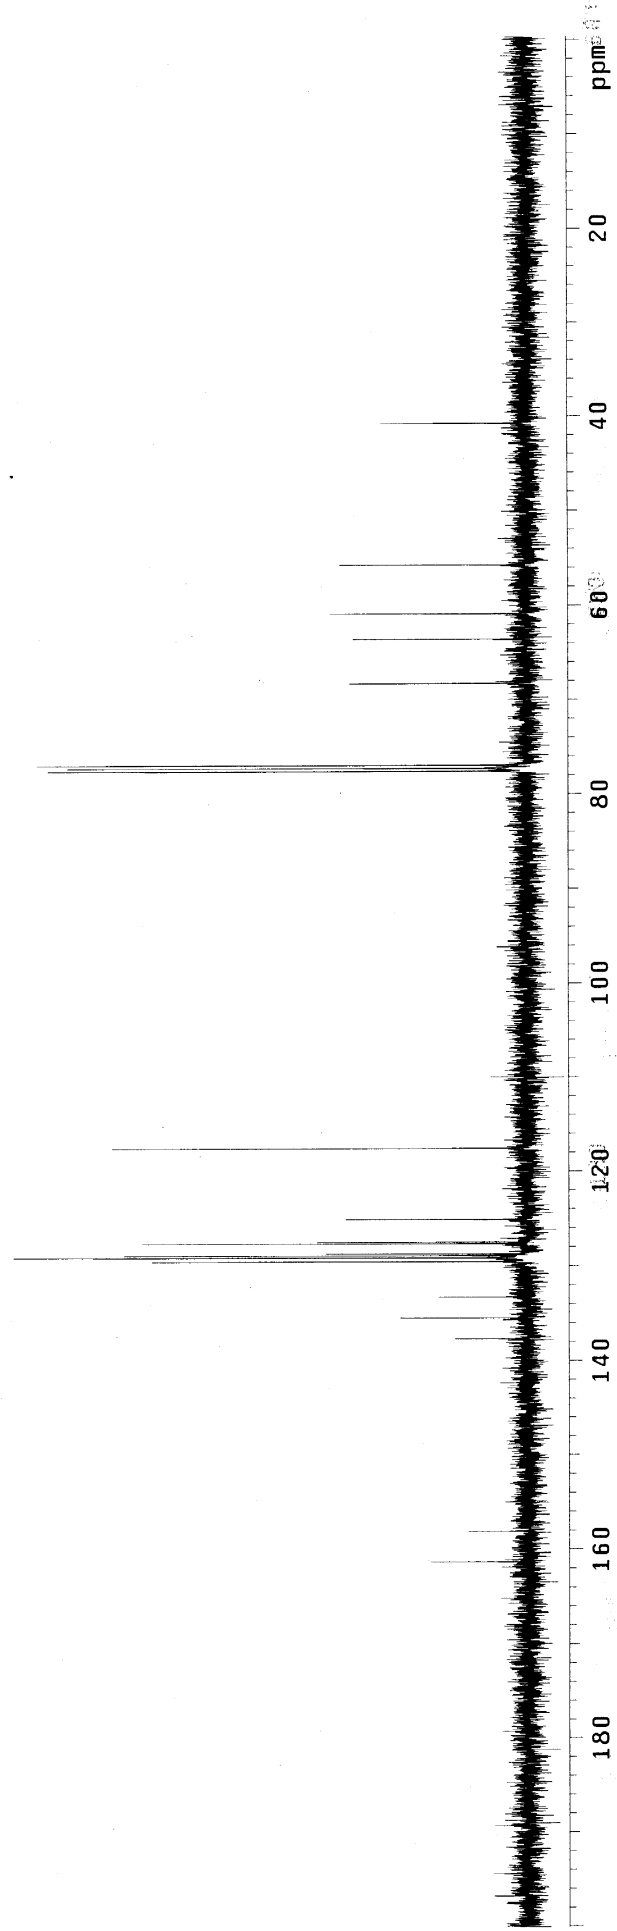

<sup>1</sup>H NMR  
400 MHz, CDCl<sub>3</sub>

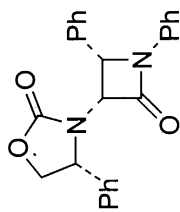

*cis*-12

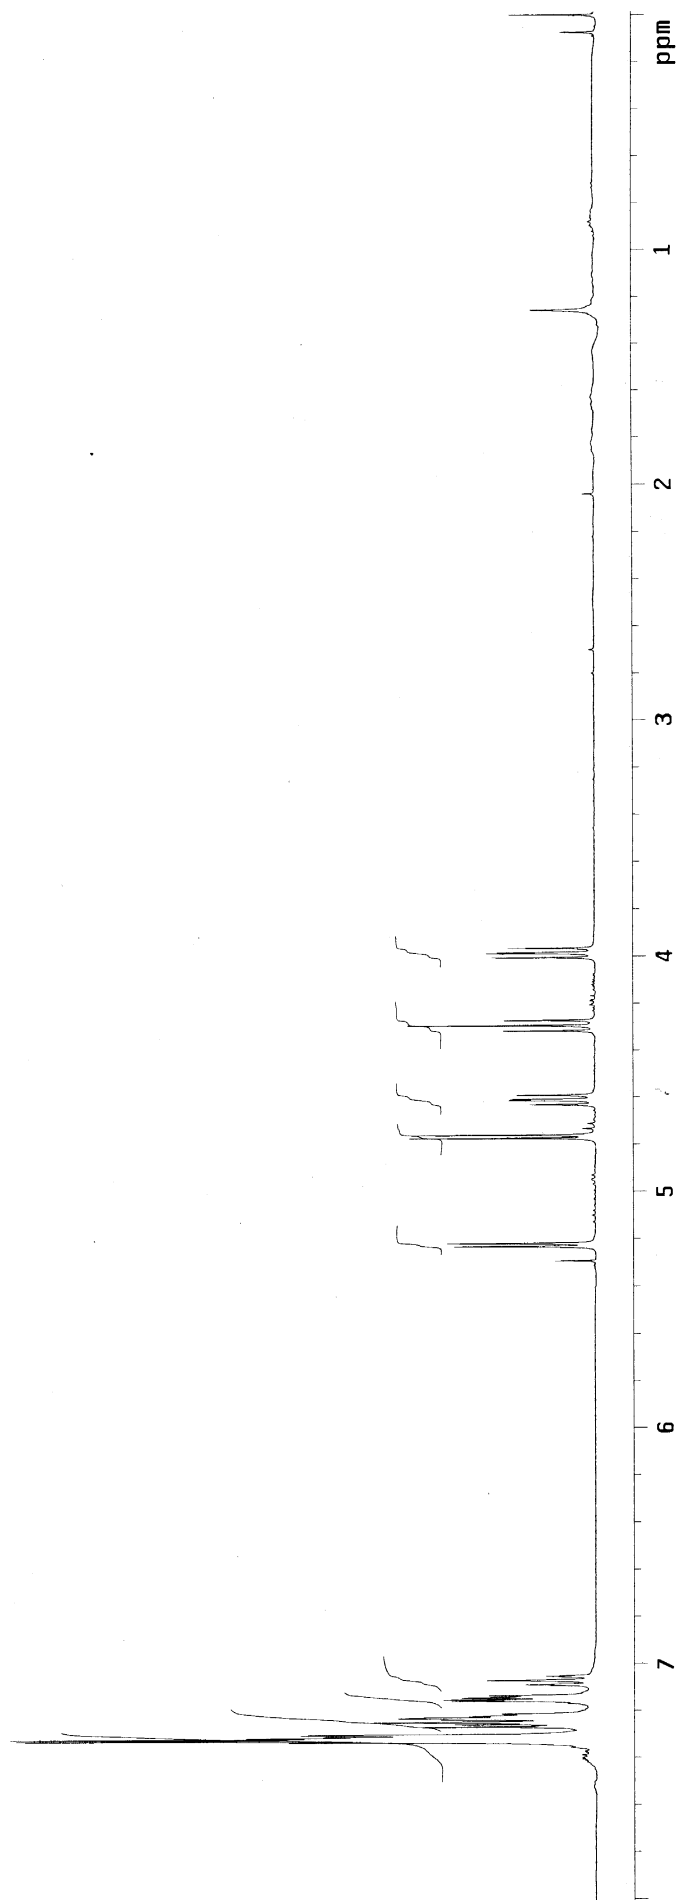



<sup>13</sup>C NMR  
100 MHz, CDCl<sub>3</sub>

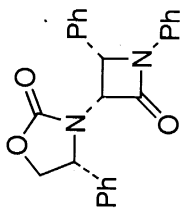

*cis*-12

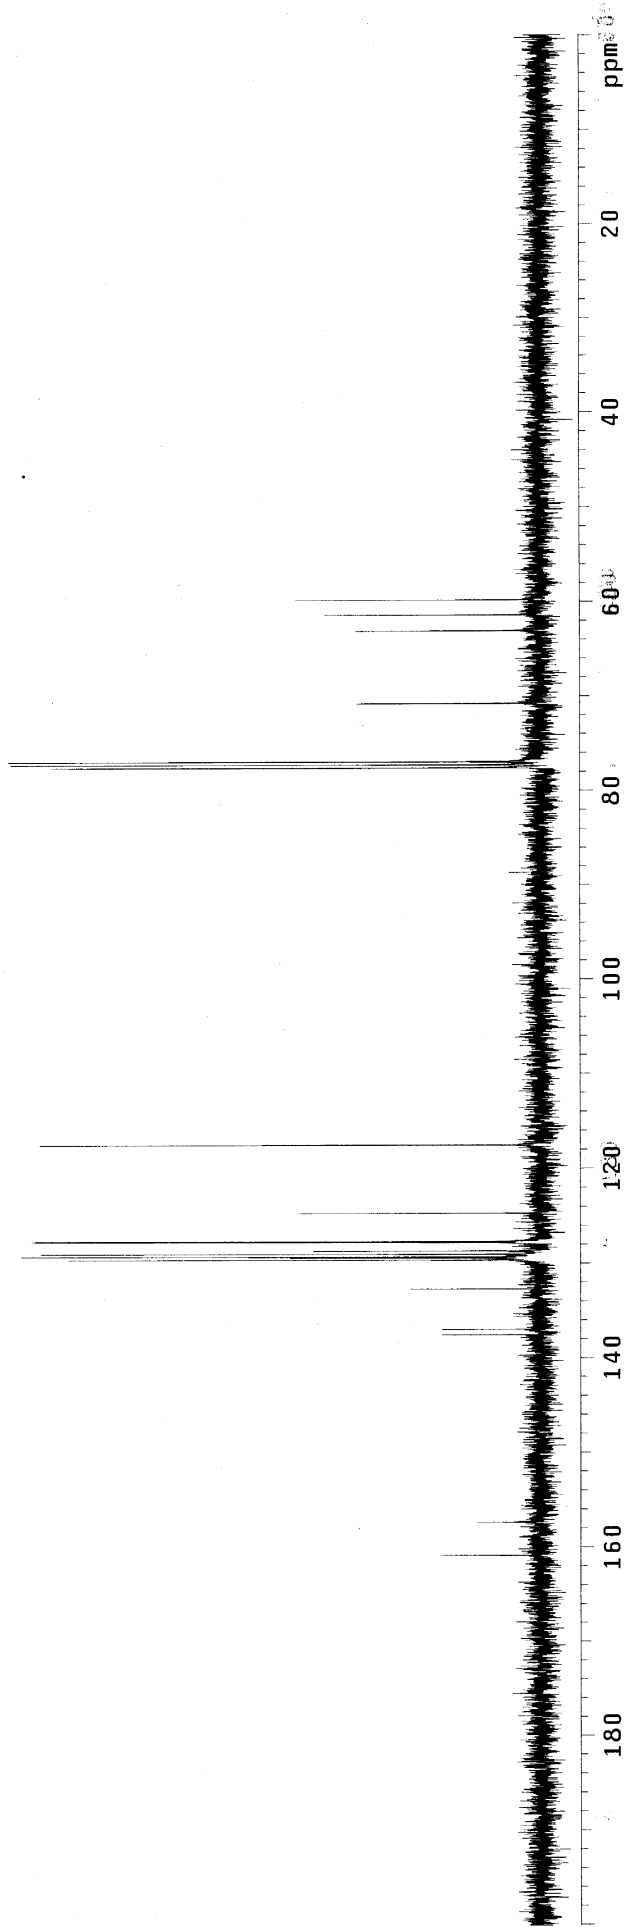

<sup>1</sup>H NMR  
400 MHz, CDCl<sub>3</sub>

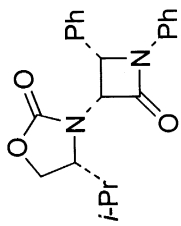

*cis*-13

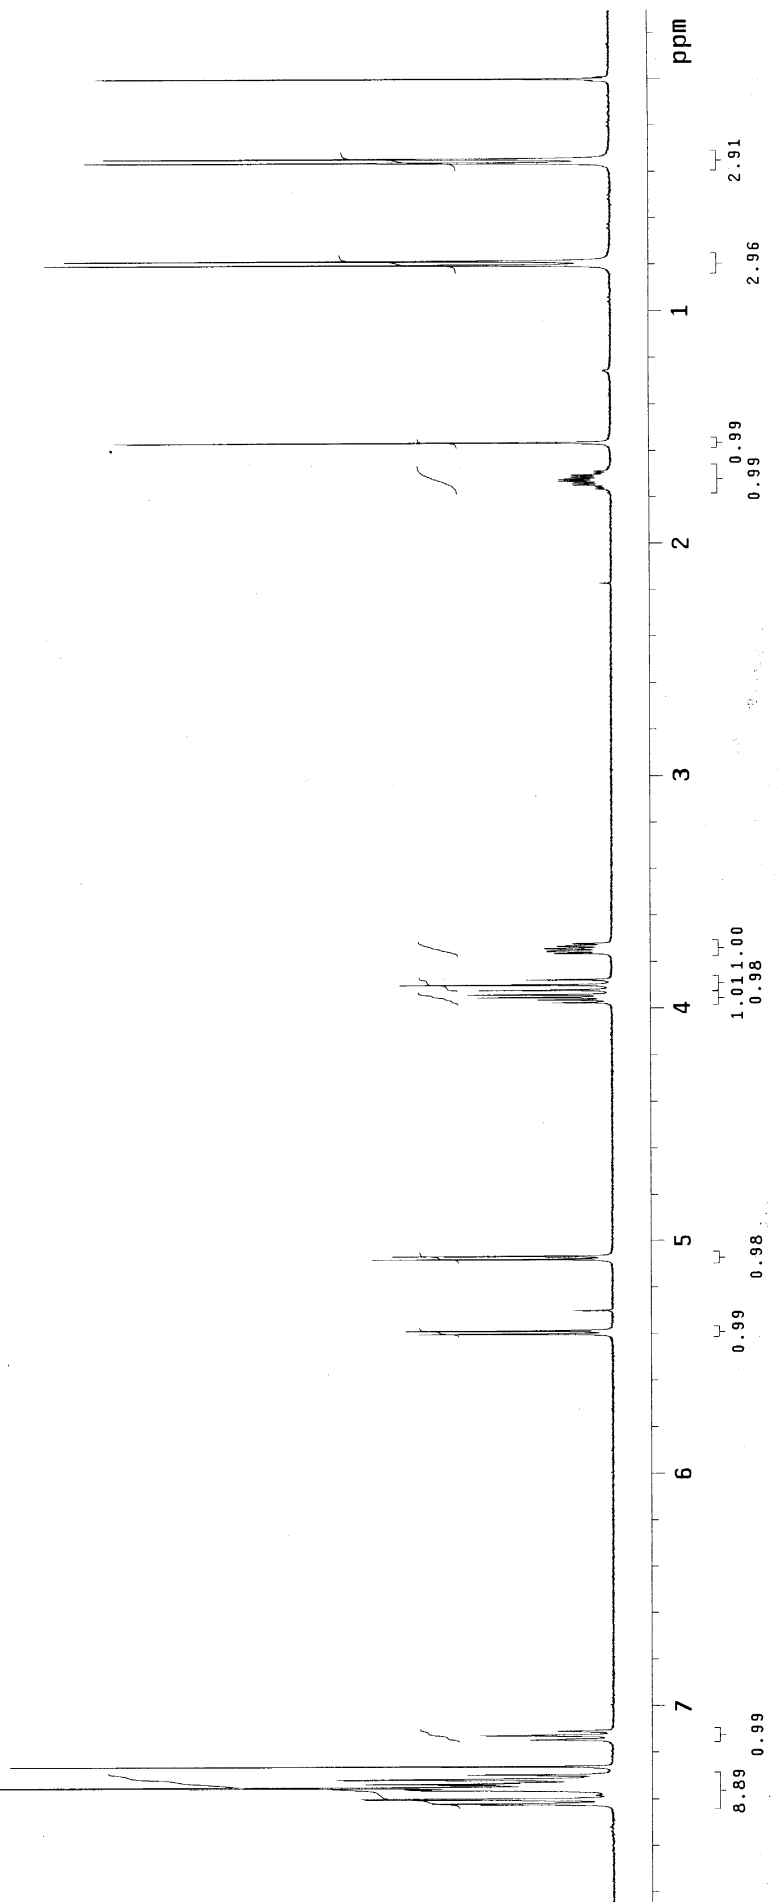

<sup>13</sup>C NMR  
100 MHz, CDCl<sub>3</sub>

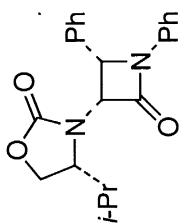

*cis*-**13**

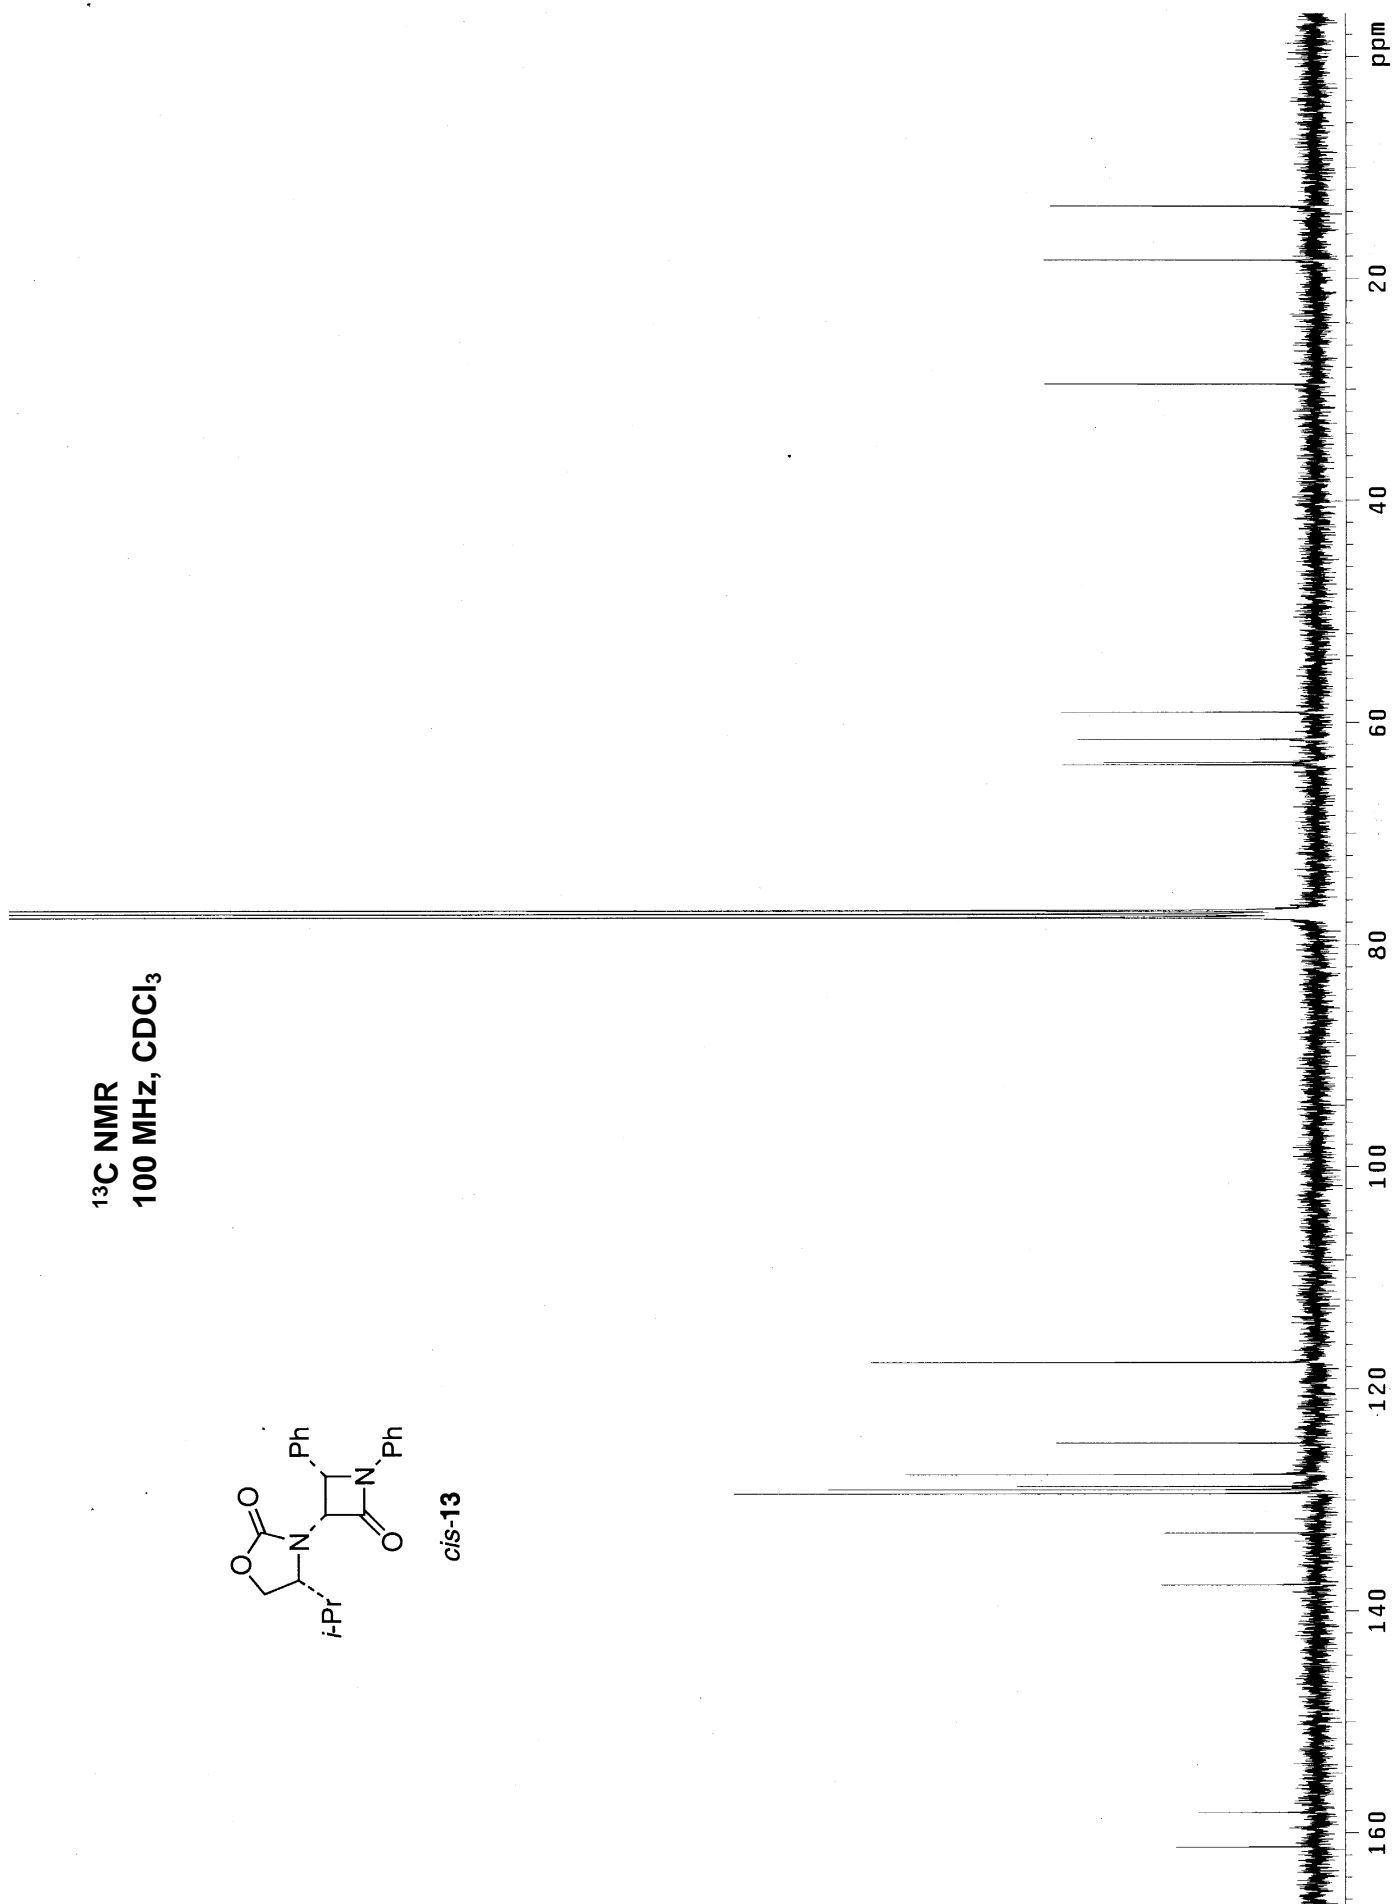

**<sup>1</sup>H NMR**  
**400 MHz, CD<sub>2</sub>Cl<sub>2</sub>**

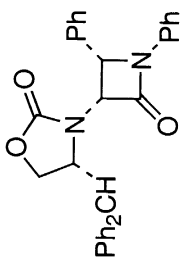

*cis*-14

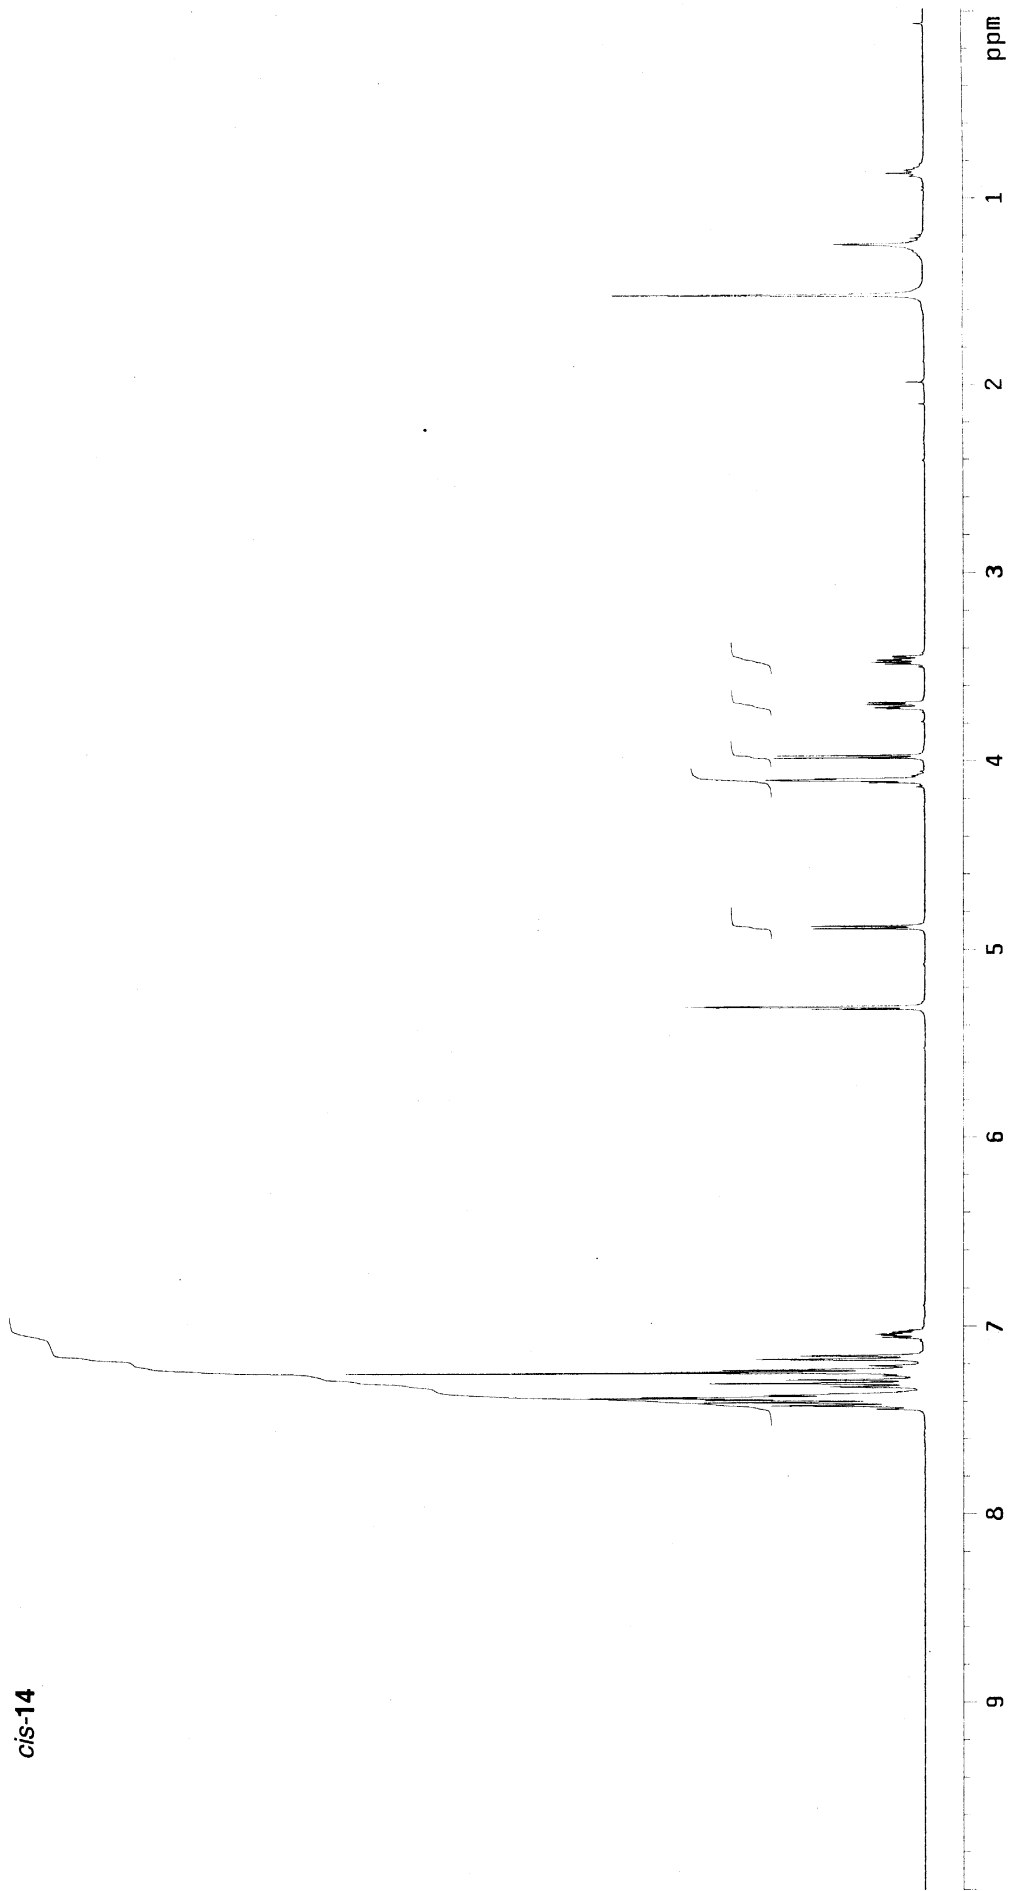

<sup>13</sup>C NMR  
100 MHz, CD<sub>2</sub>Cl<sub>2</sub>

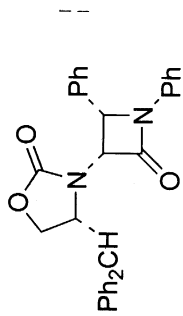

*cis*-14

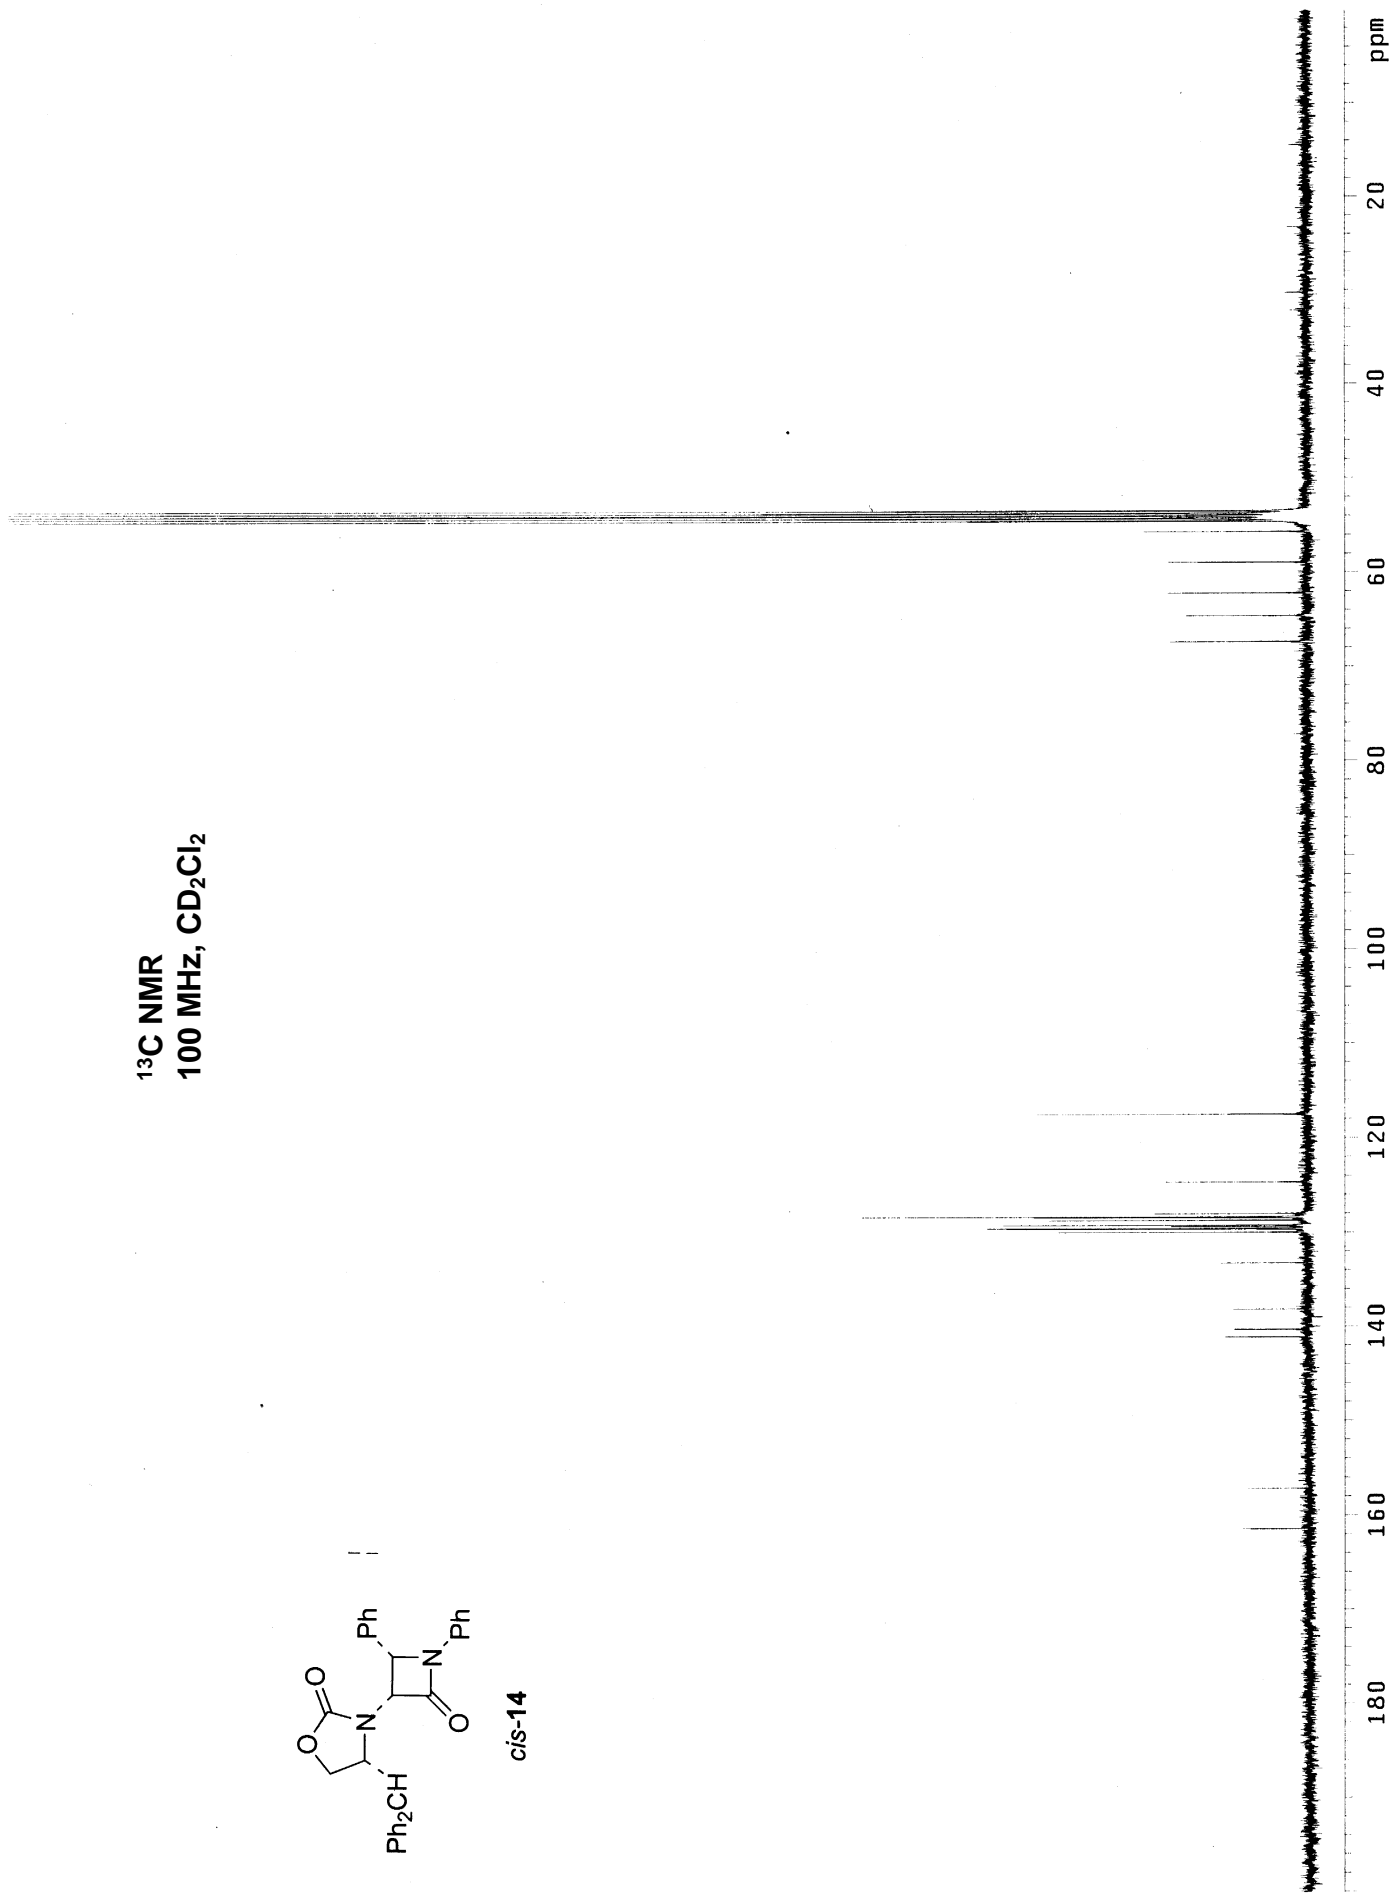

<sup>1</sup>H NMR  
500 MHz, CDCl<sub>3</sub>

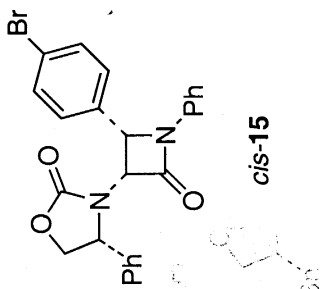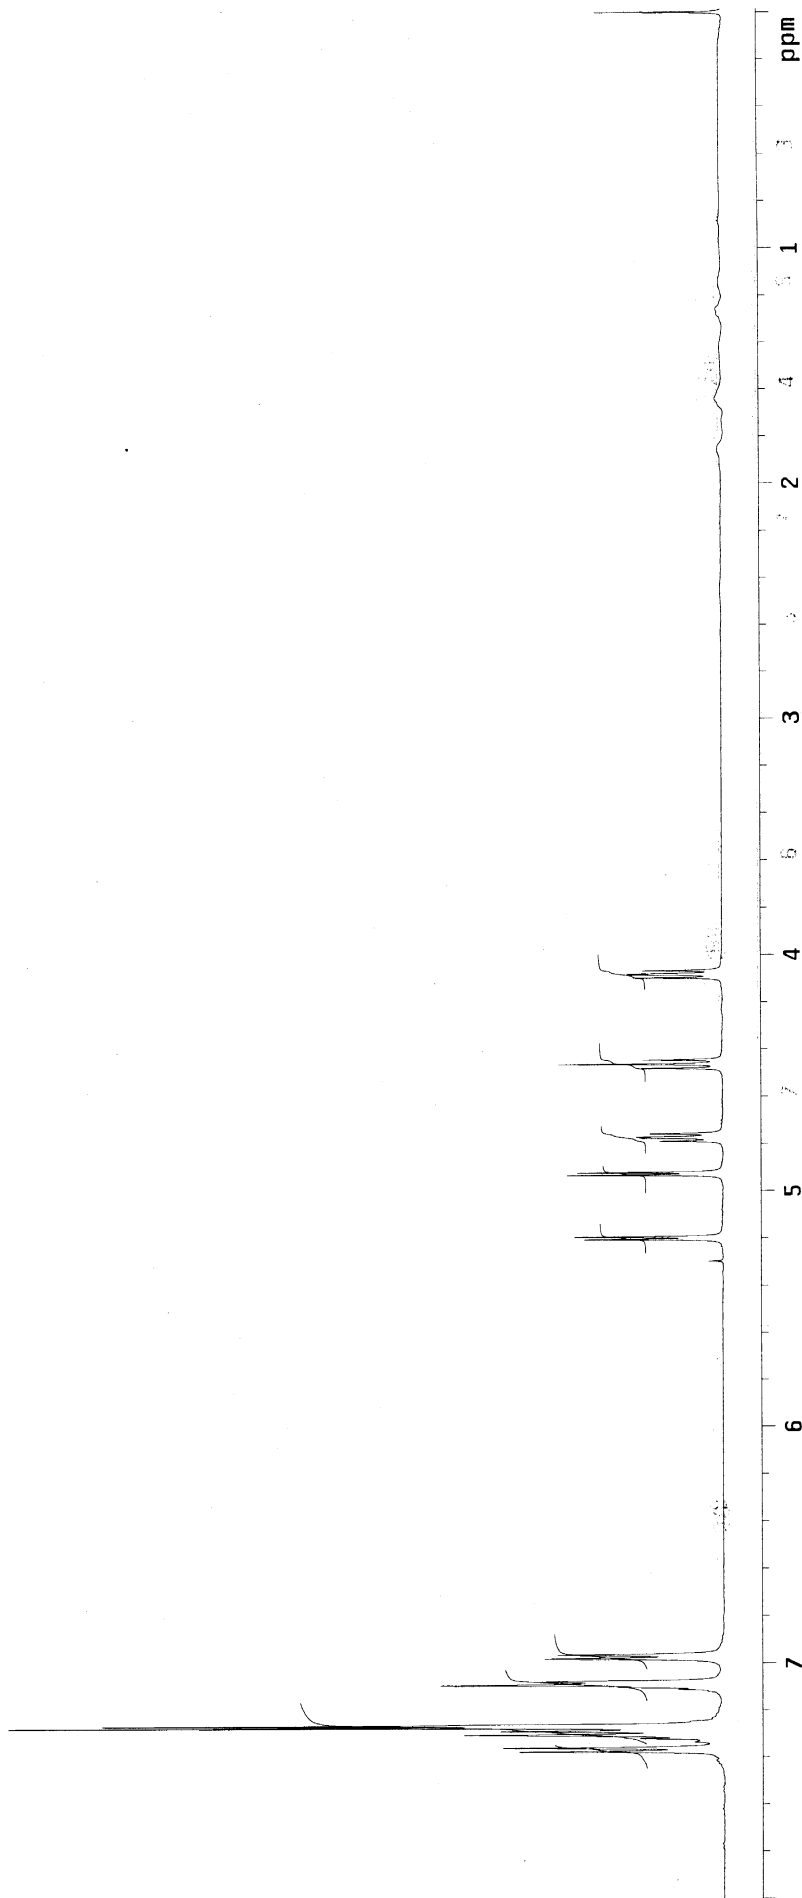

<sup>13</sup>C NMR  
125 MHz, CDCl<sub>3</sub>

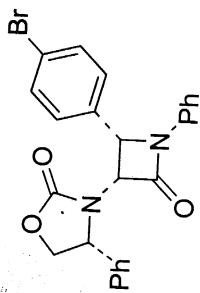

*cis*-15

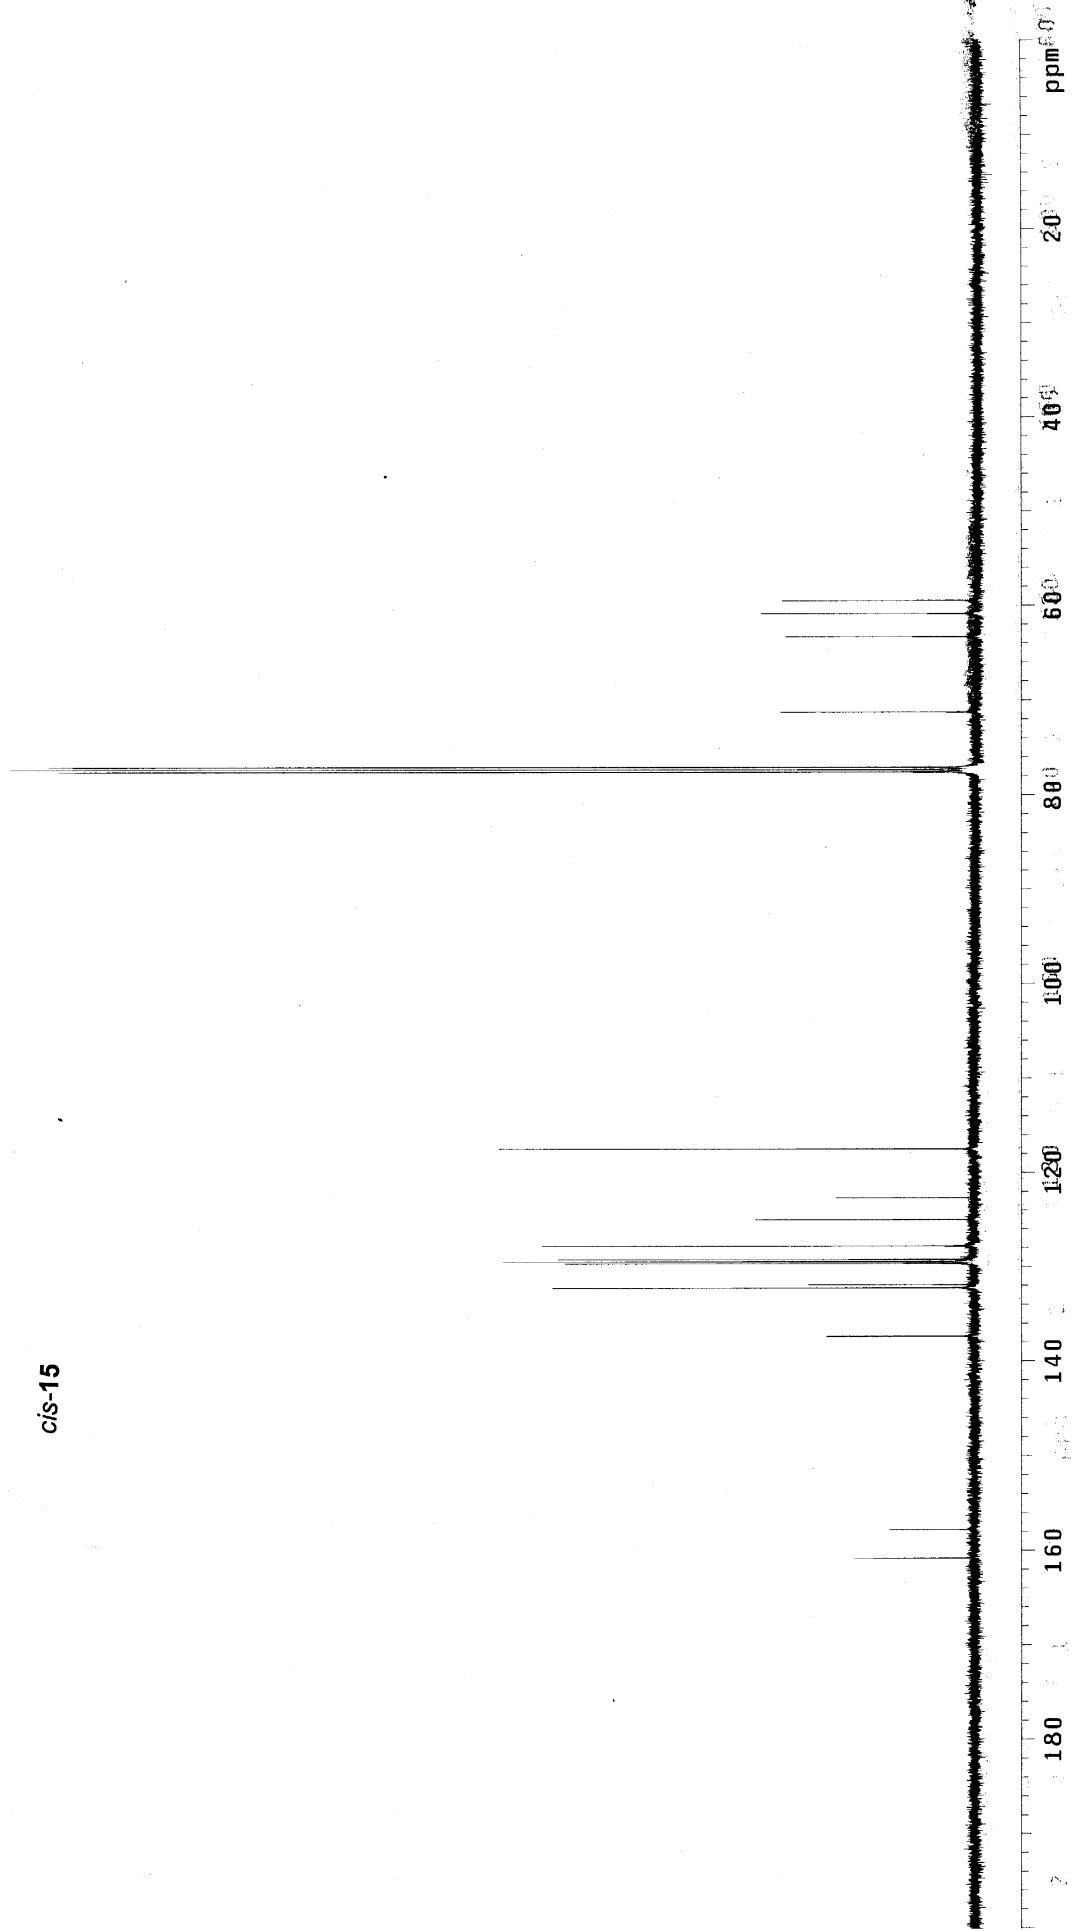

<sup>1</sup>H NMR  
400 MHz, CDCl<sub>3</sub>

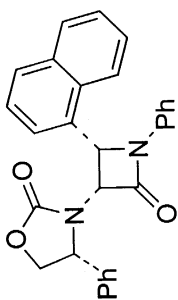

*cis*-16

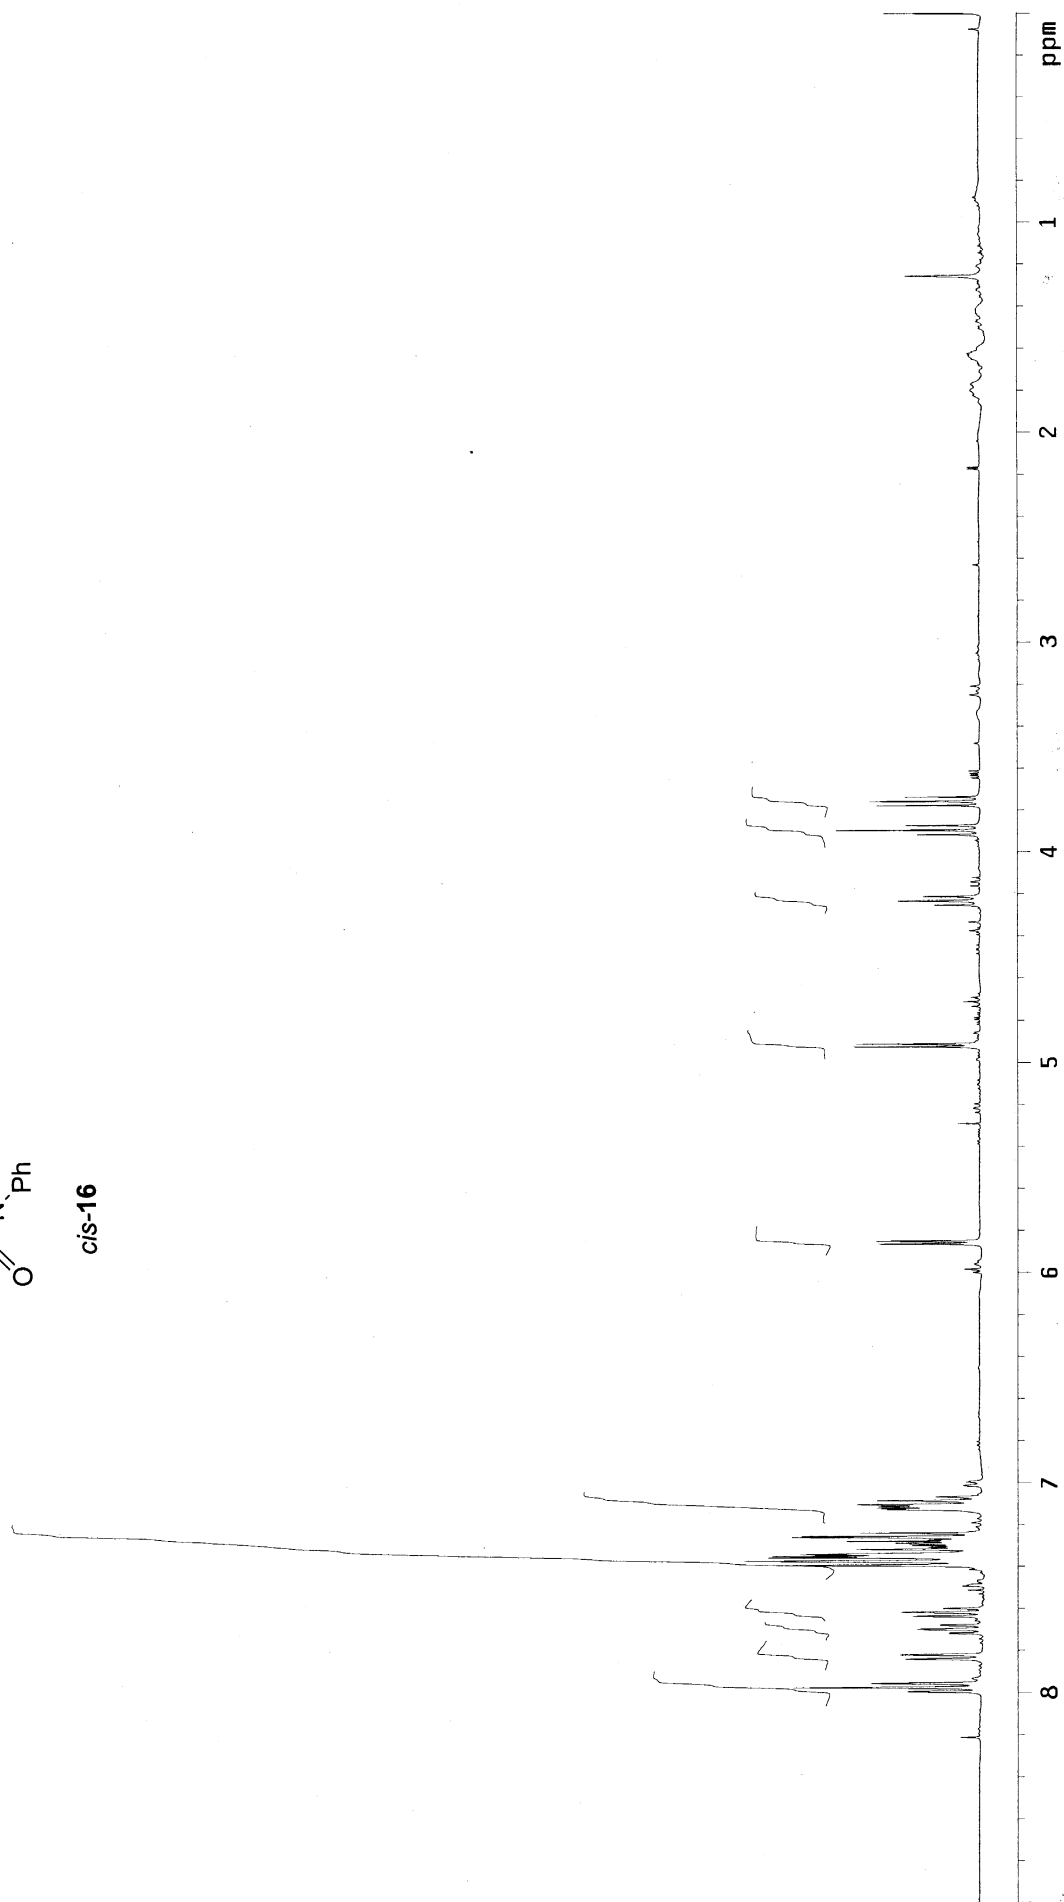



<sup>13</sup>C NMR  
100 MHz, CDCl<sub>3</sub>

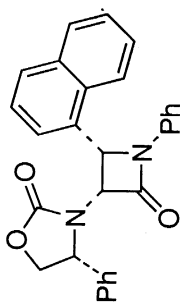

*cis*-16

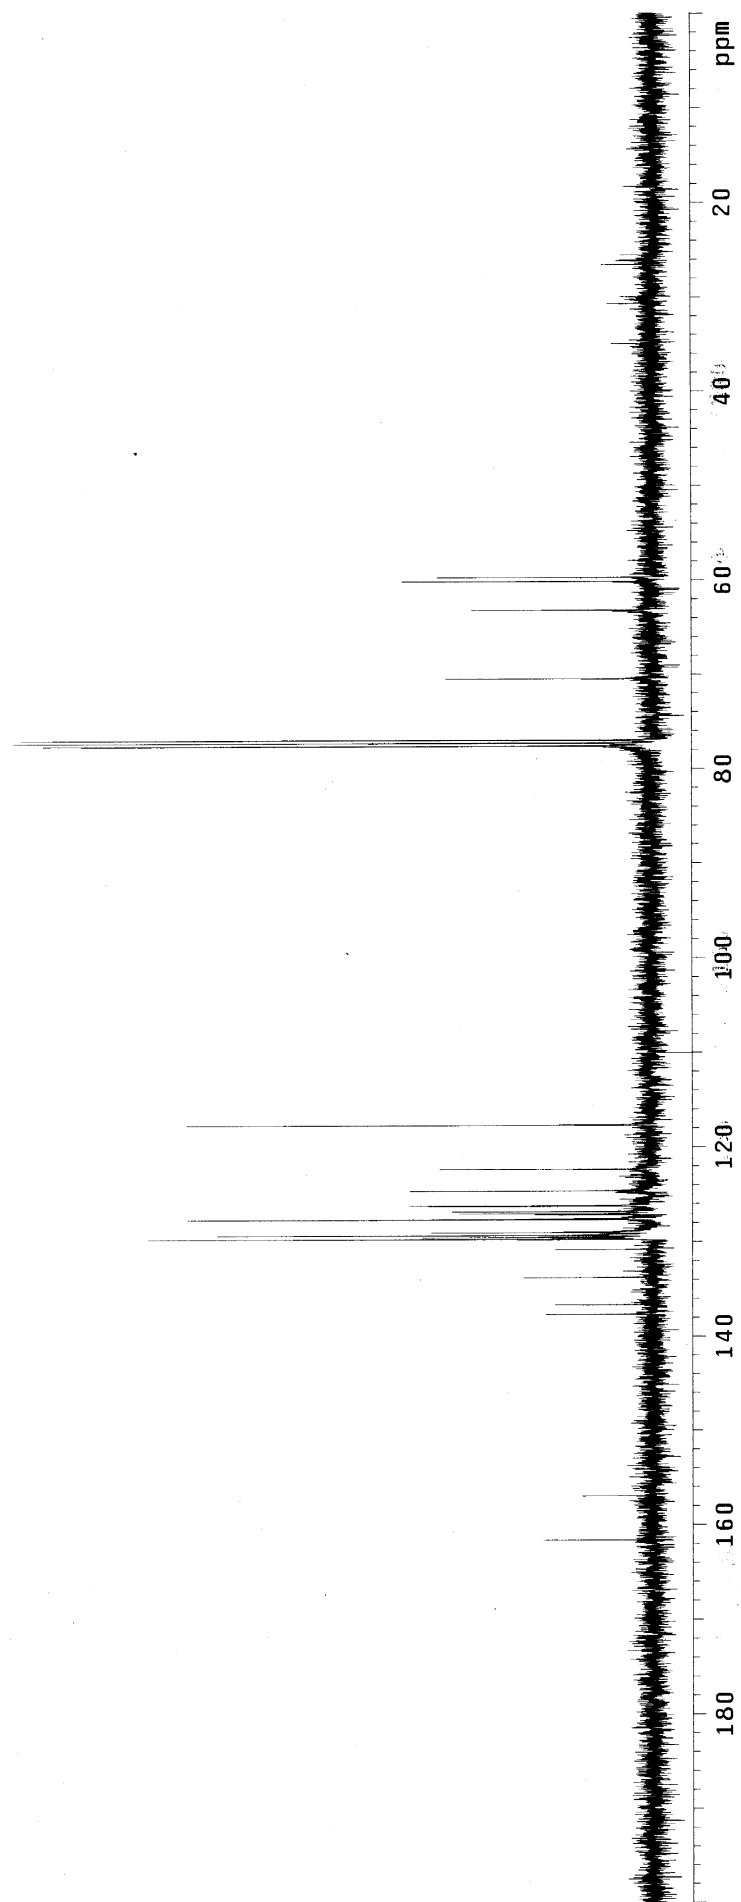

**<sup>1</sup>H NMR**  
**400 MHz, CDCl<sub>3</sub>**

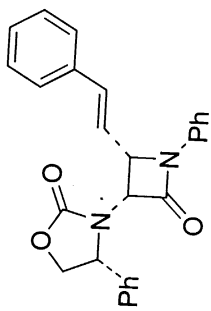

*cis*-17

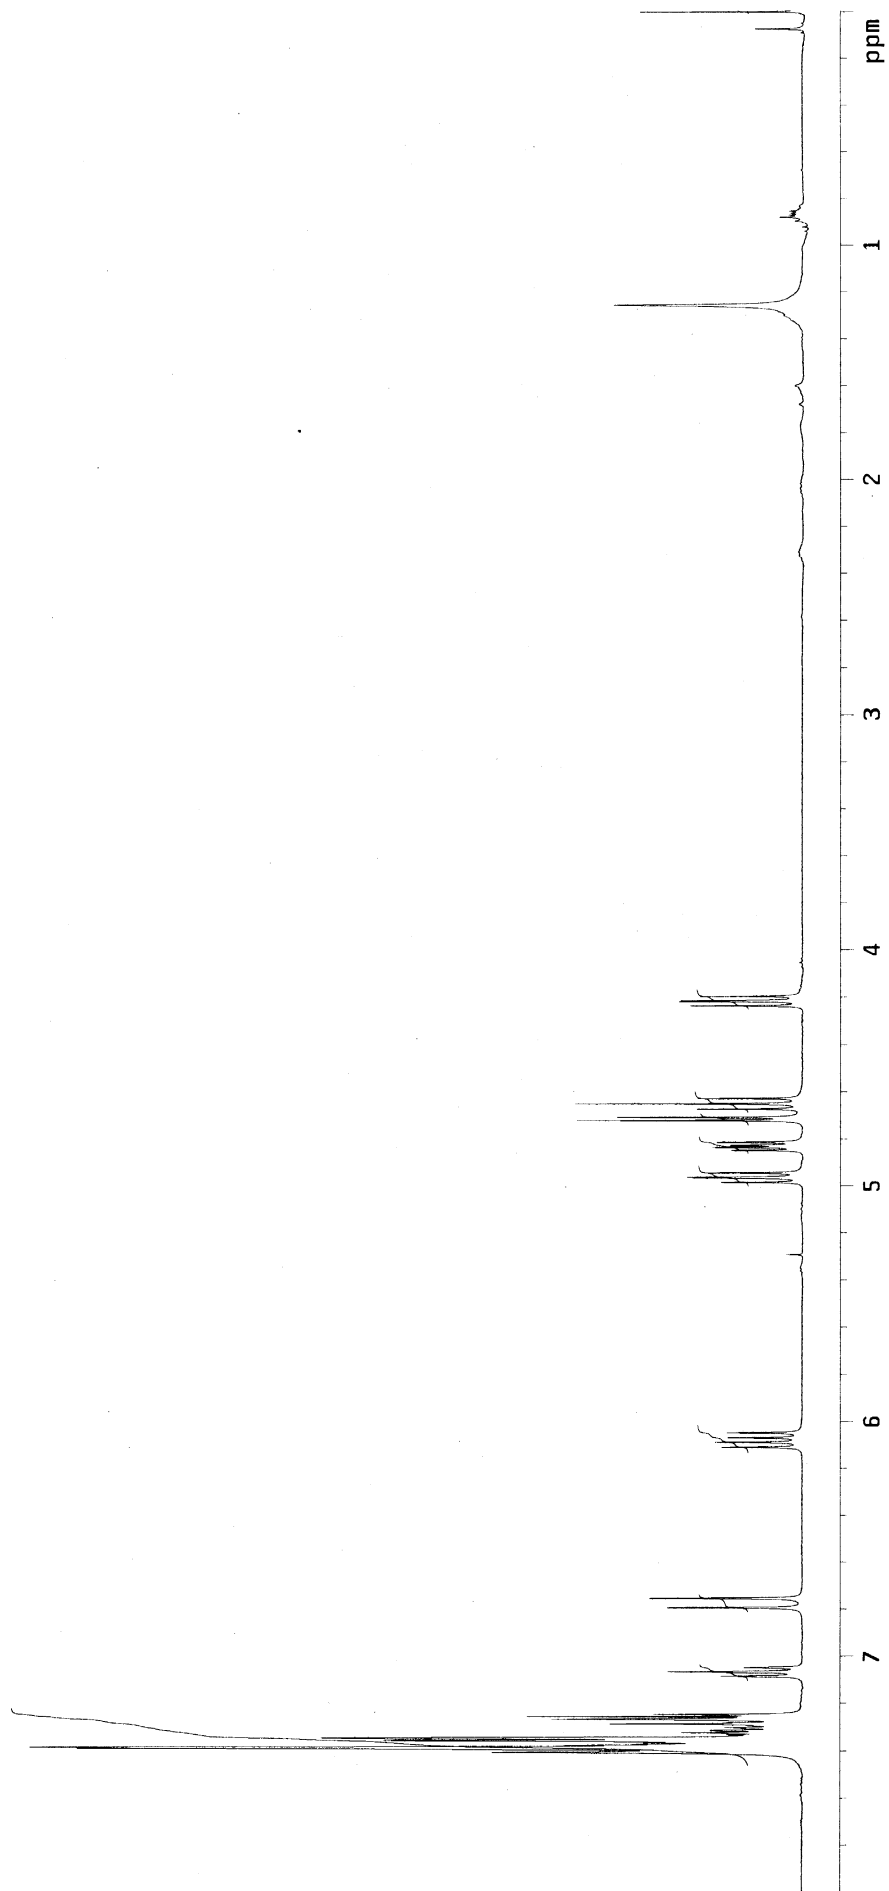

<sup>13</sup>C NMR  
125 MHz, CDCl<sub>3</sub>

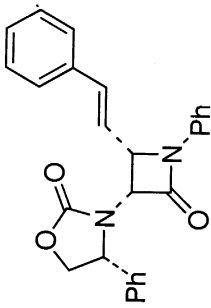

*cis*-17

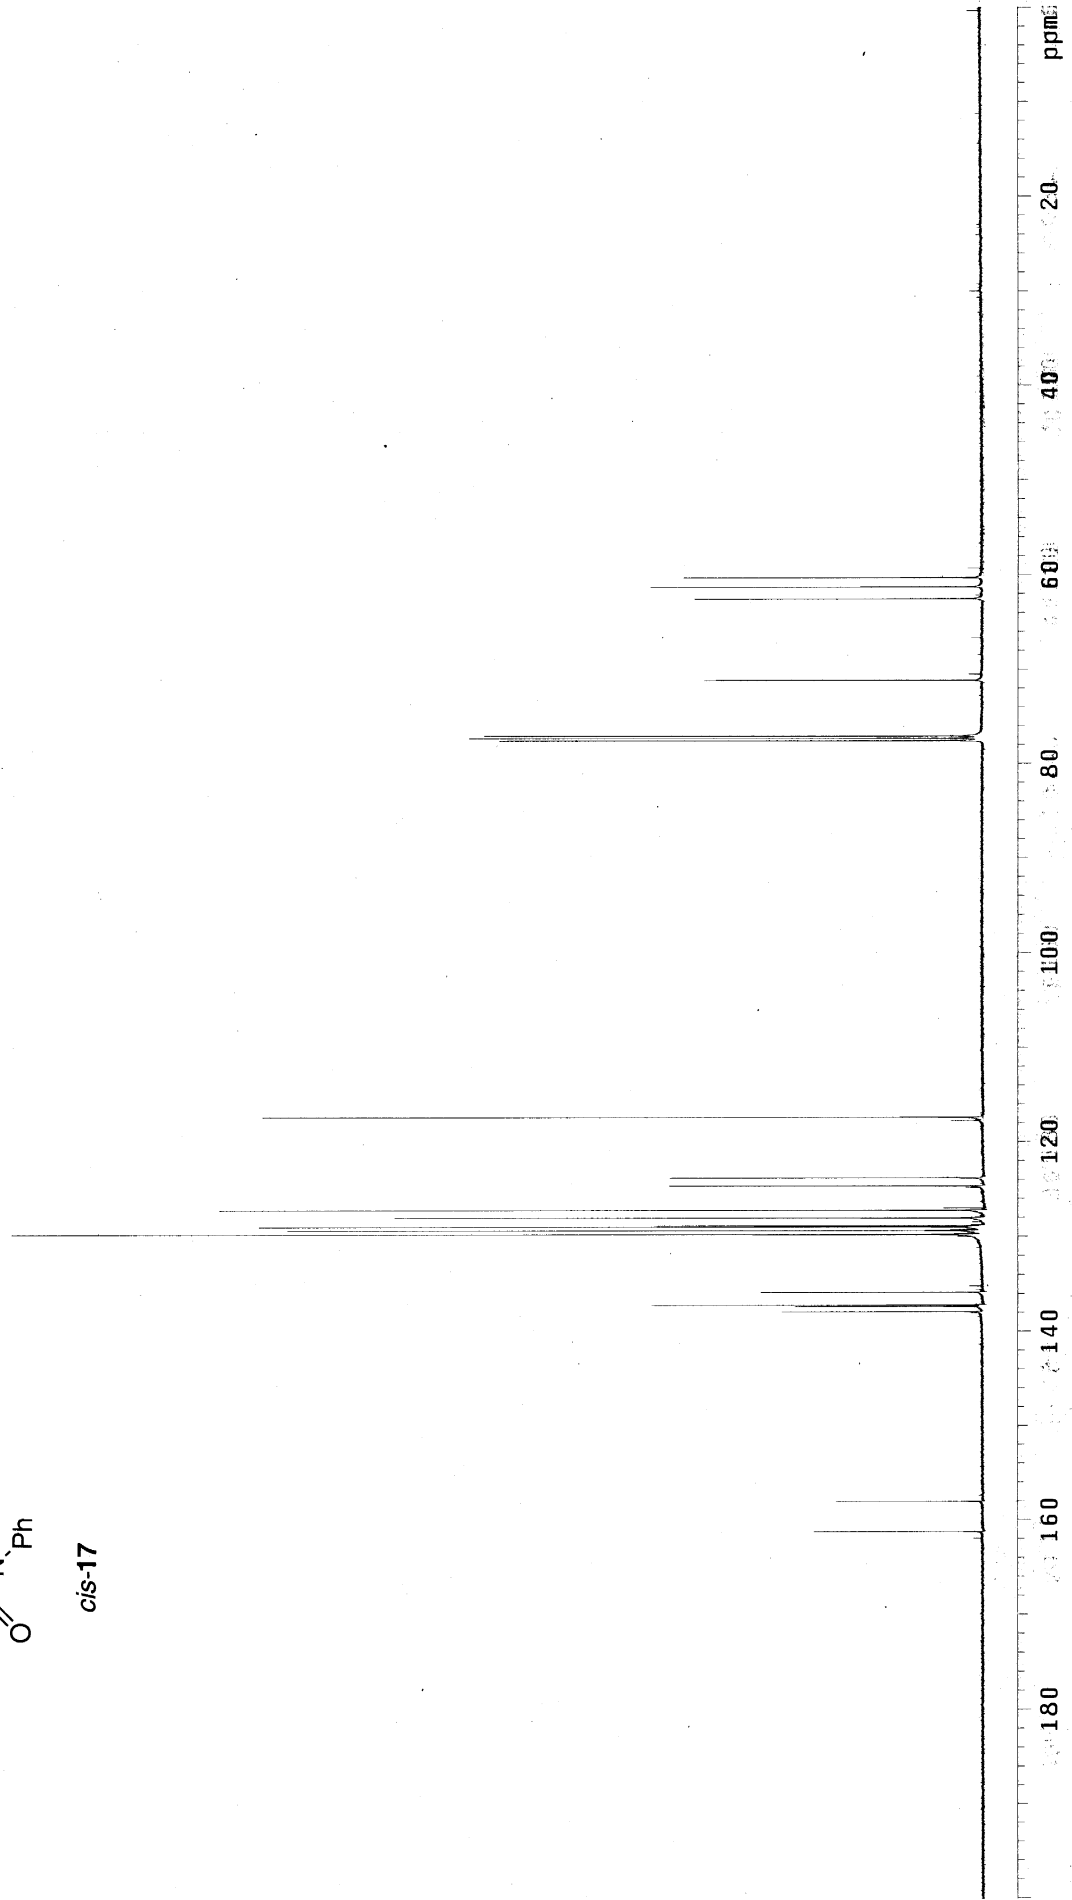

<sup>1</sup>H NMR  
500 MHz, CDCl<sub>3</sub>

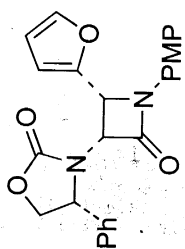

*cis*-18

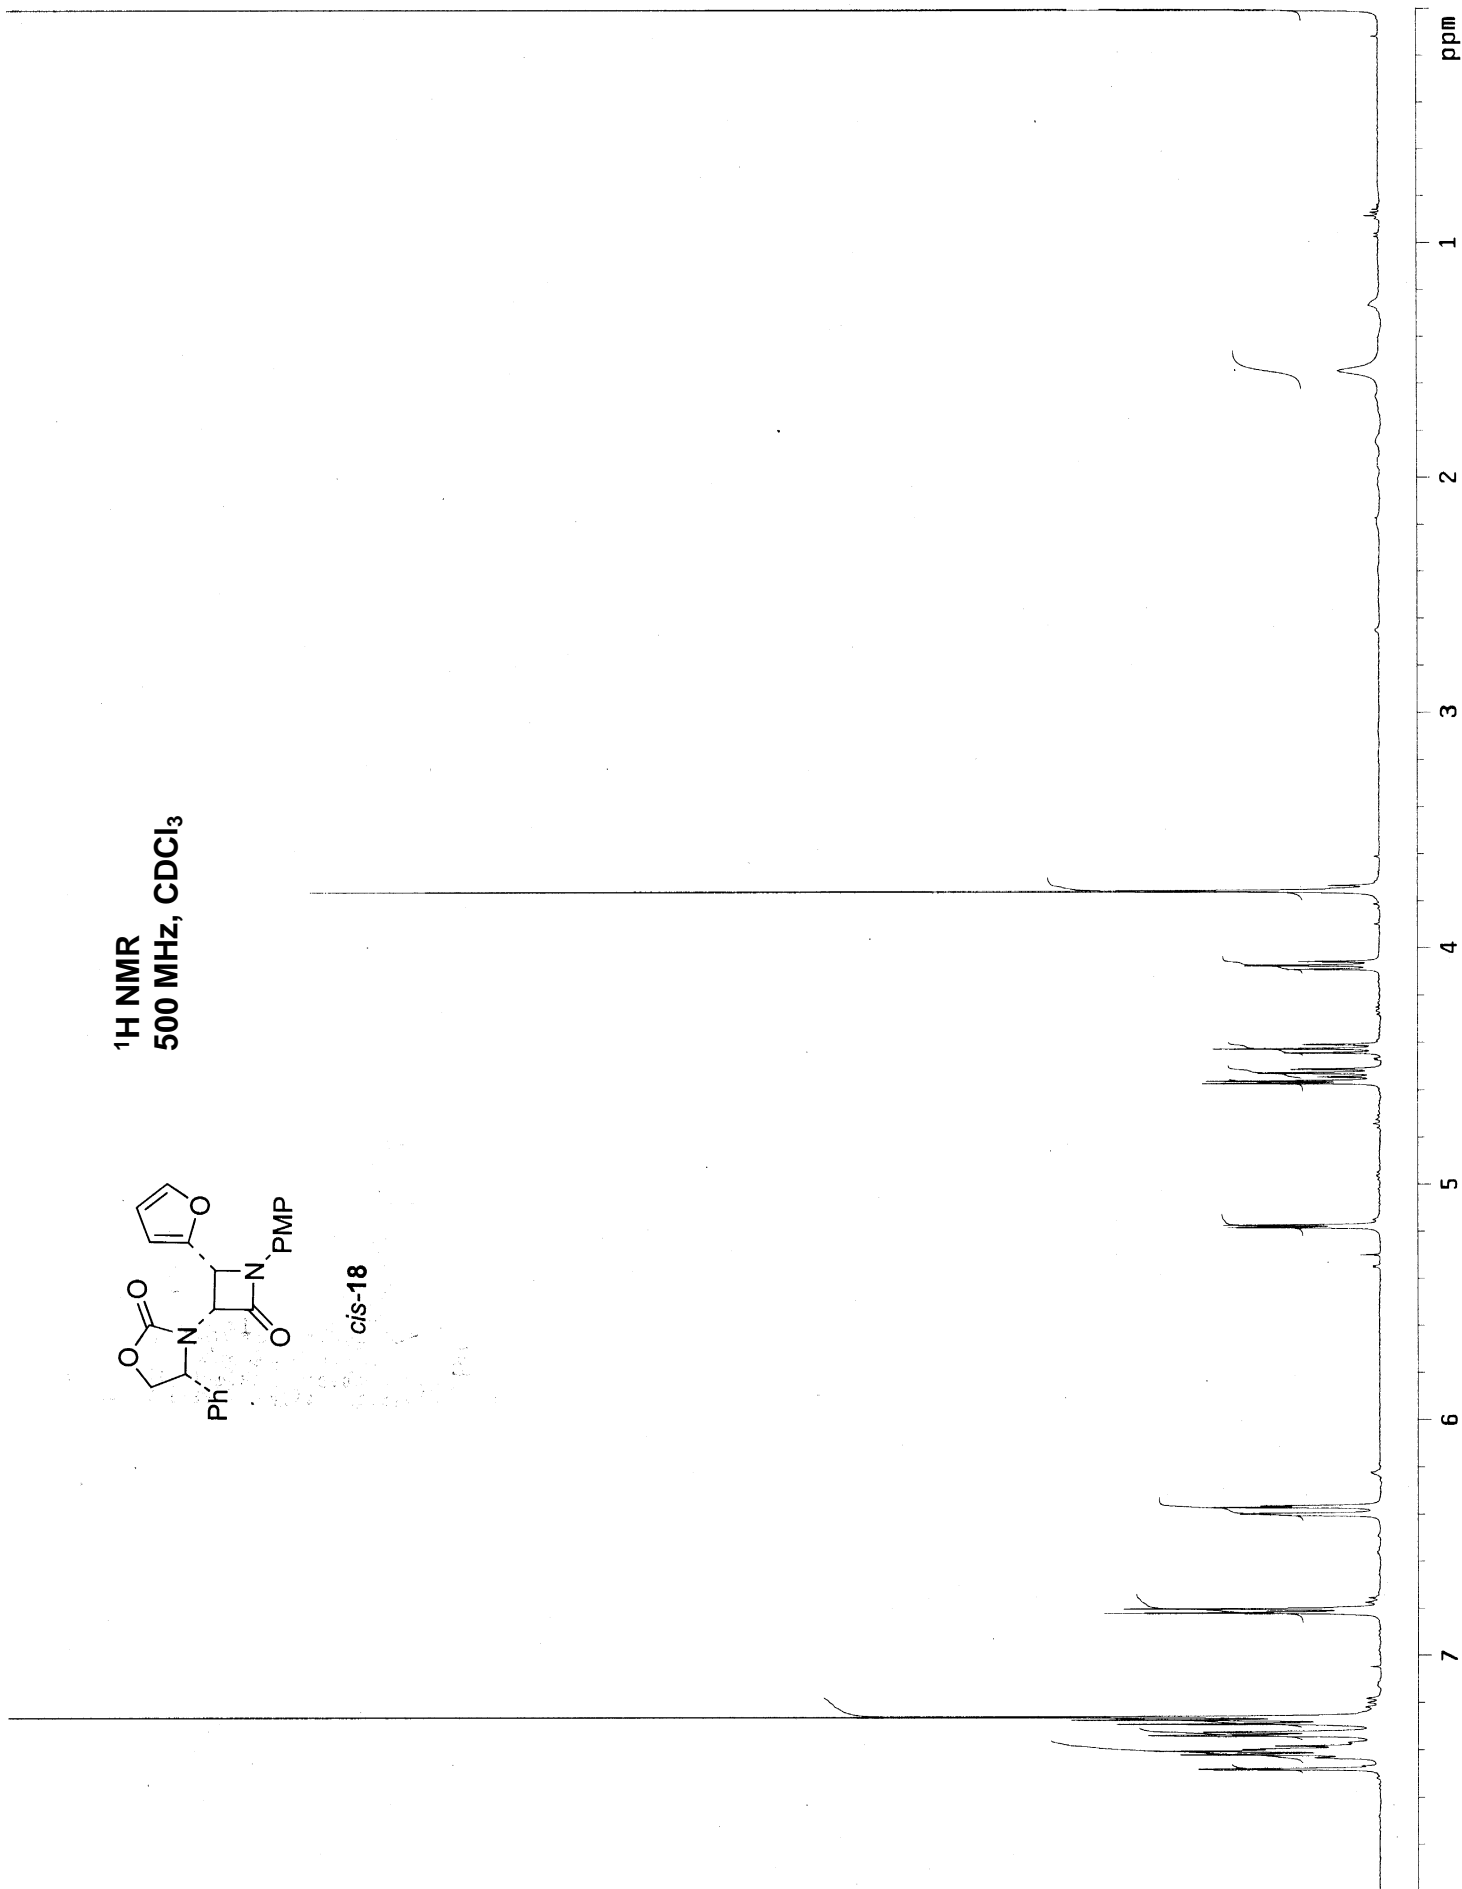

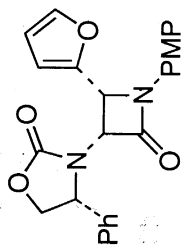

<sup>13</sup>C NMR  
125 MHz, CDCl<sub>3</sub>

*cis*-18

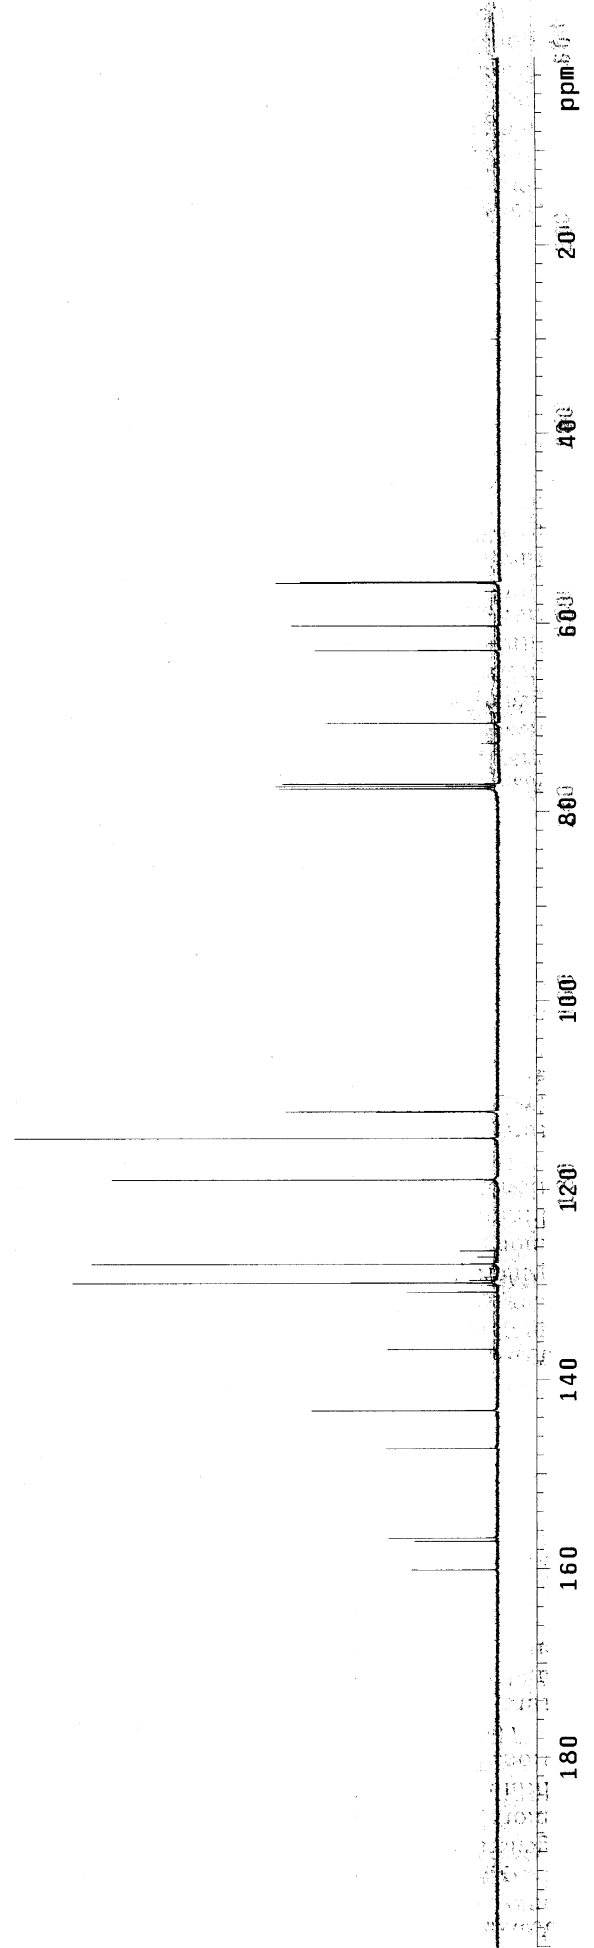

<sup>1</sup>H NMR  
500 MHz, CDCl<sub>3</sub>

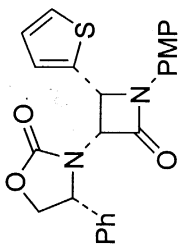

*cis*-19

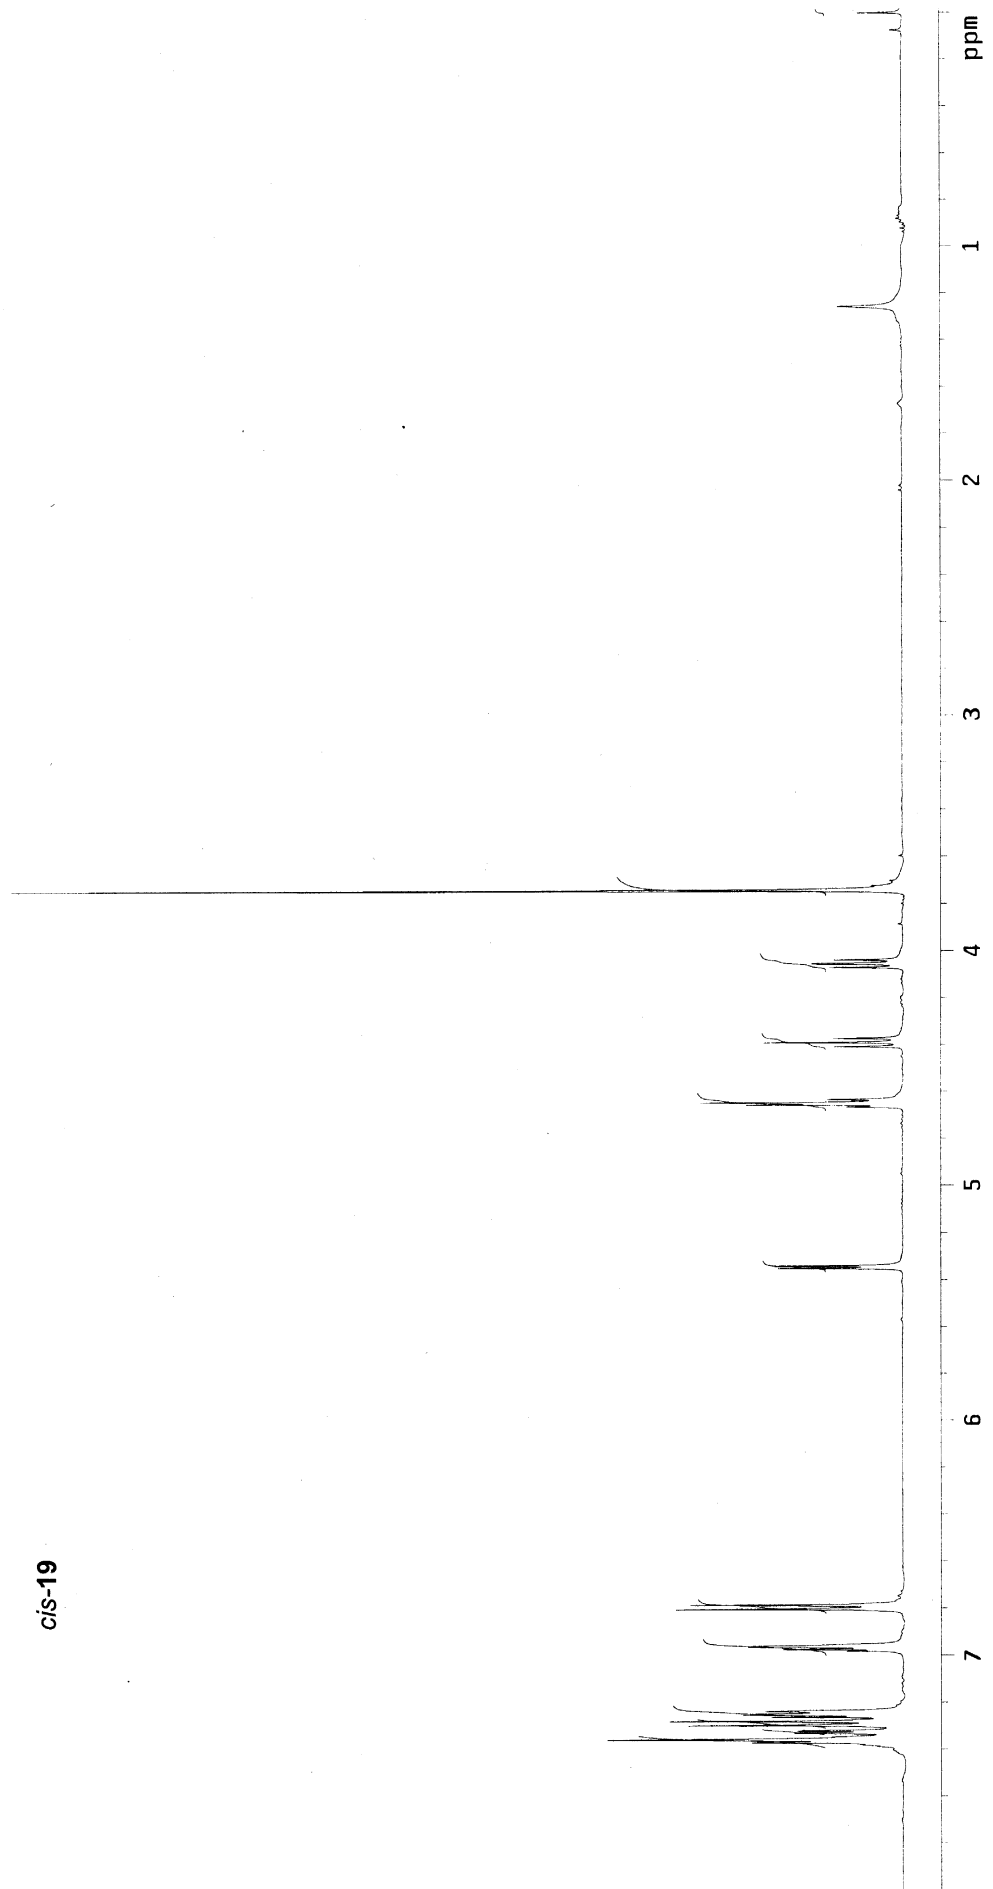

<sup>13</sup>C NMR  
125 MHz, CDCl<sub>3</sub>

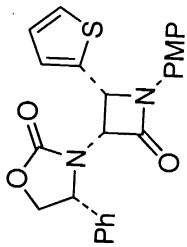

*cis*-19

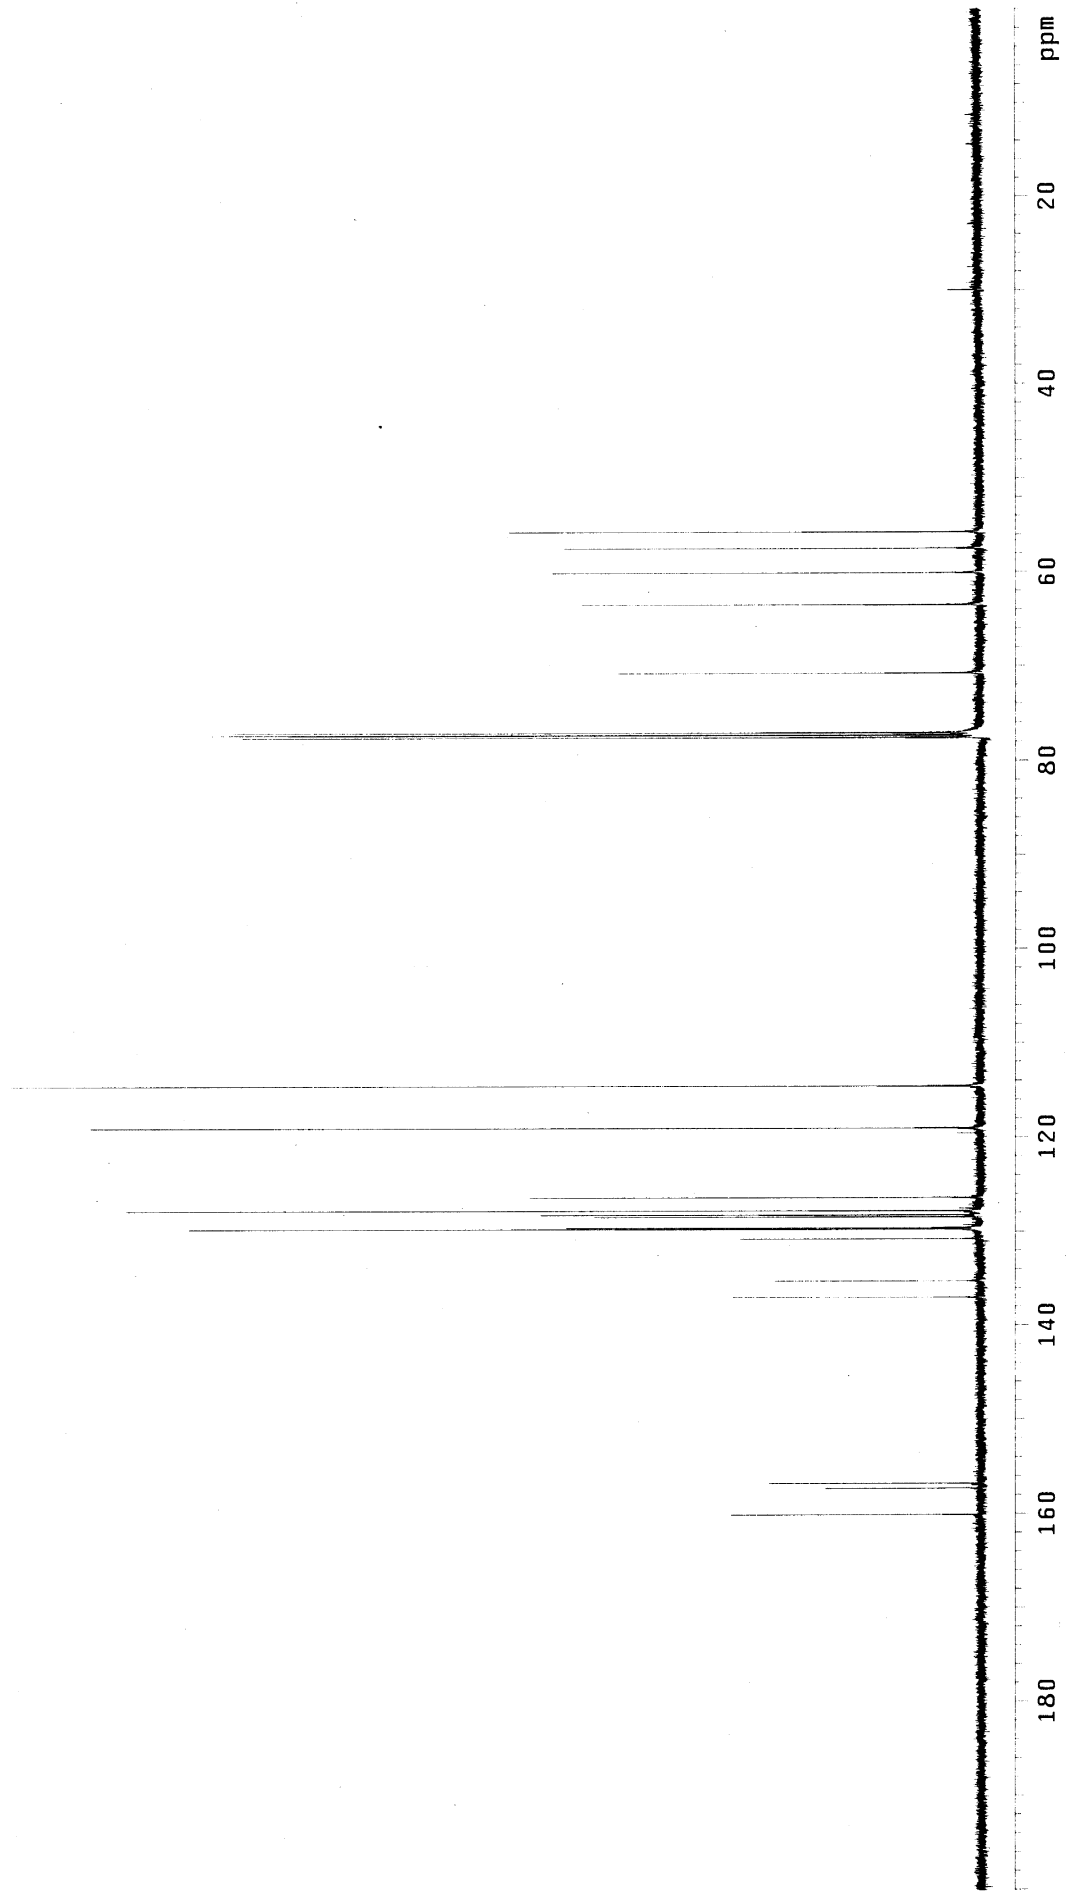

<sup>1</sup>H NMR  
400 MHz, CDCl<sub>3</sub>

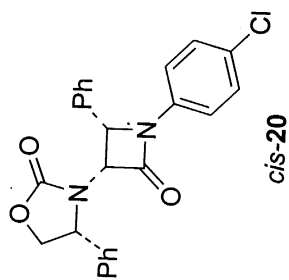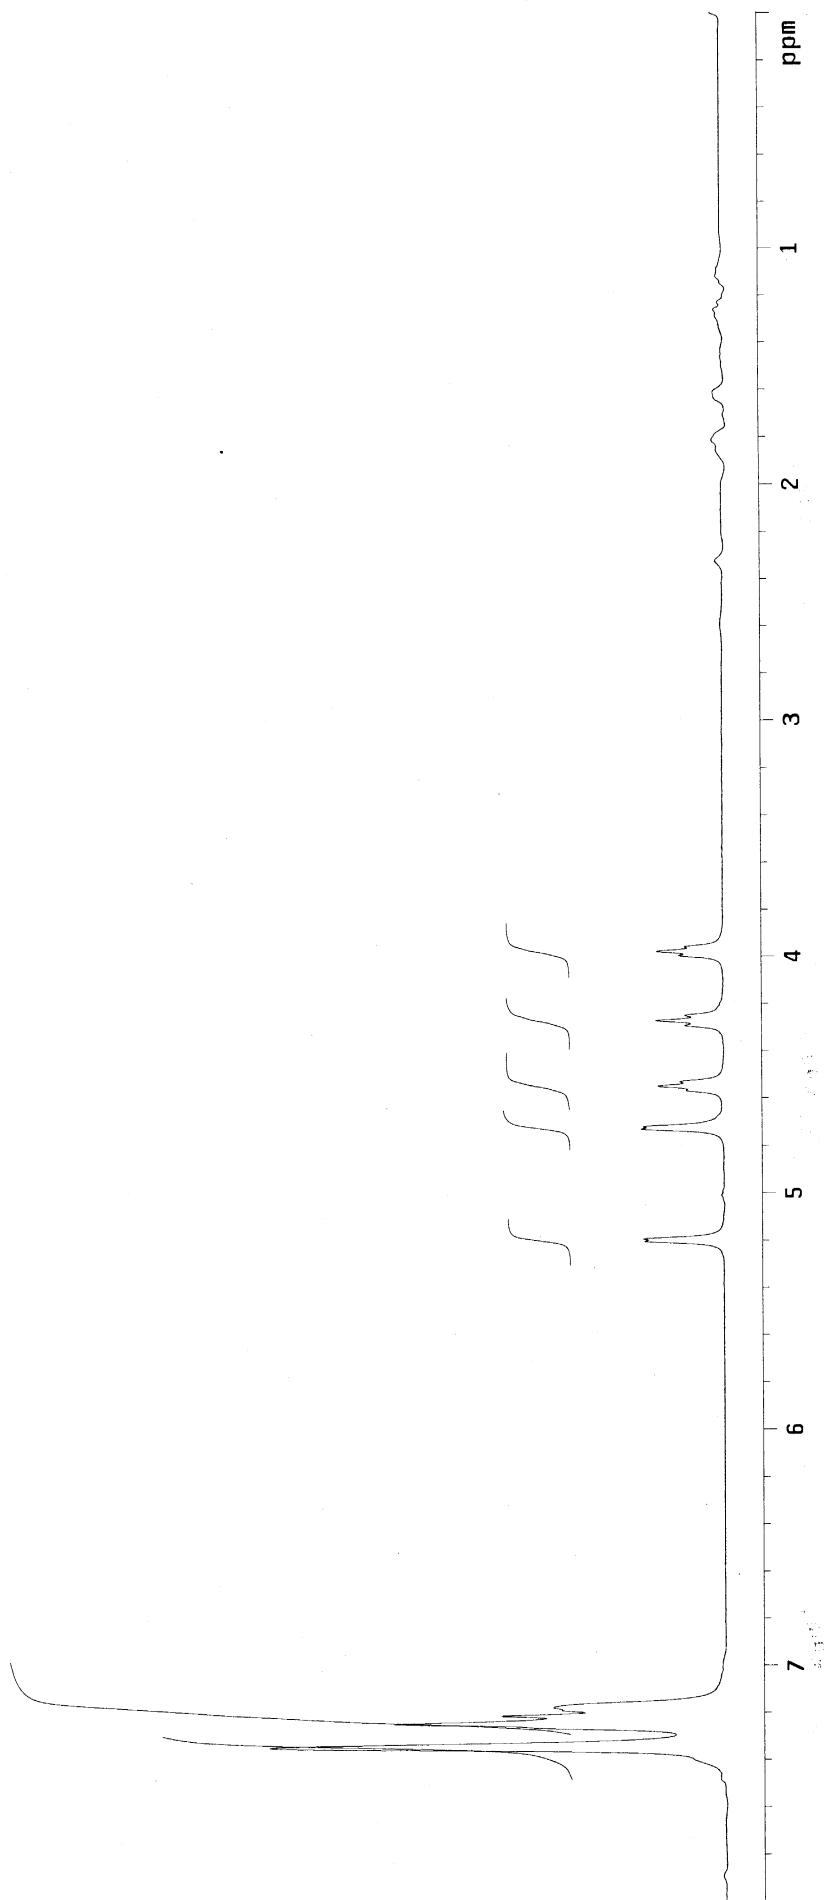



<sup>13</sup>C NMR  
100 MHz, CDCl<sub>3</sub>

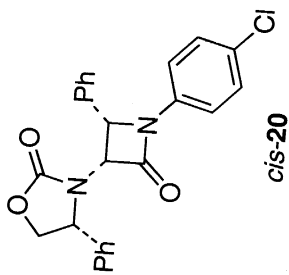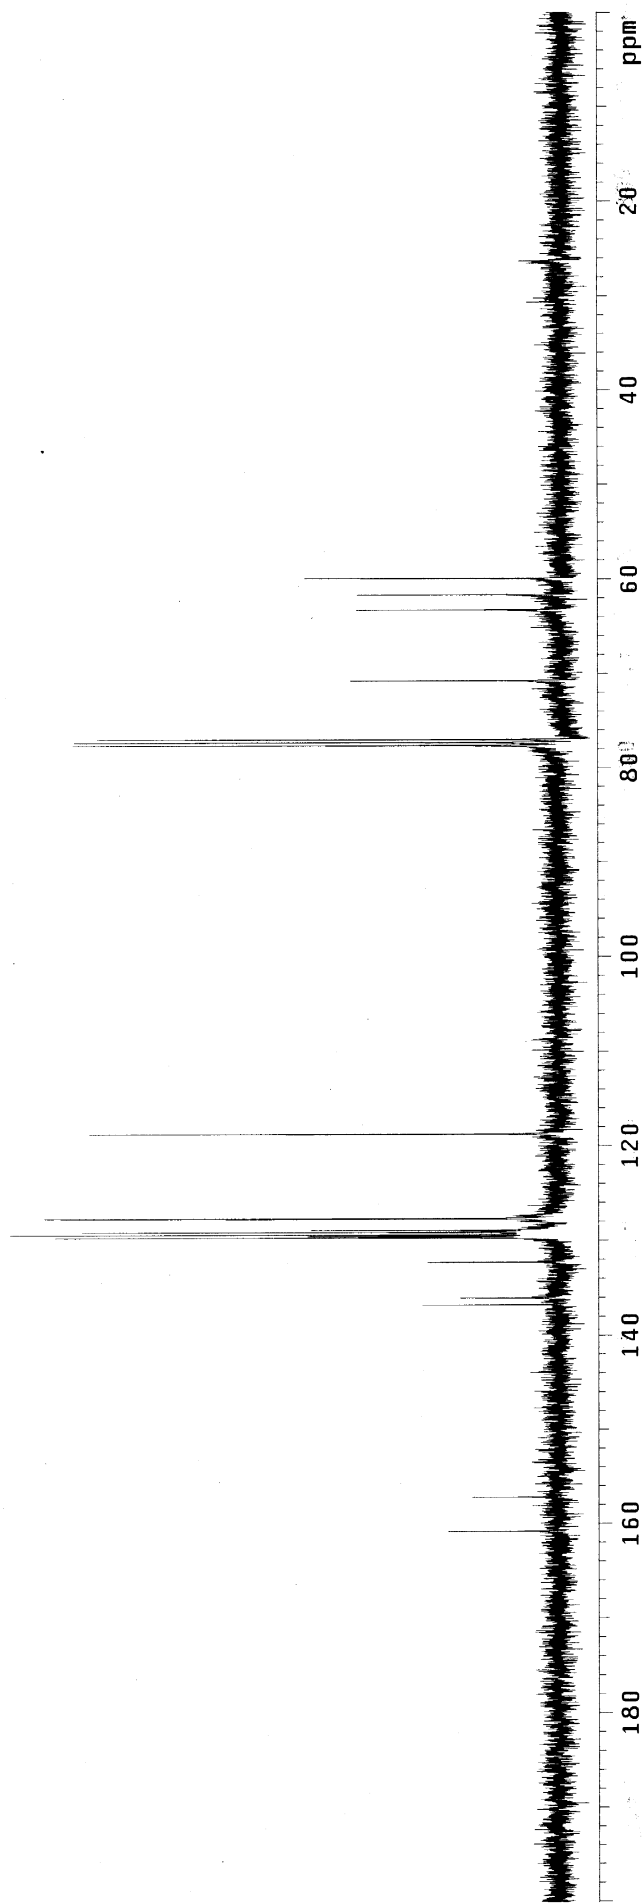

**<sup>1</sup>H NMR**  
**400 MHz, CDCl<sub>3</sub>**

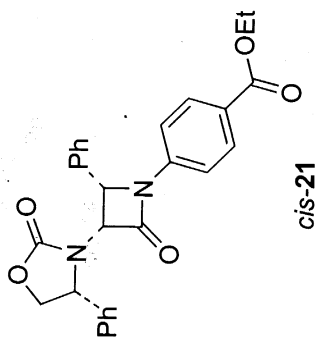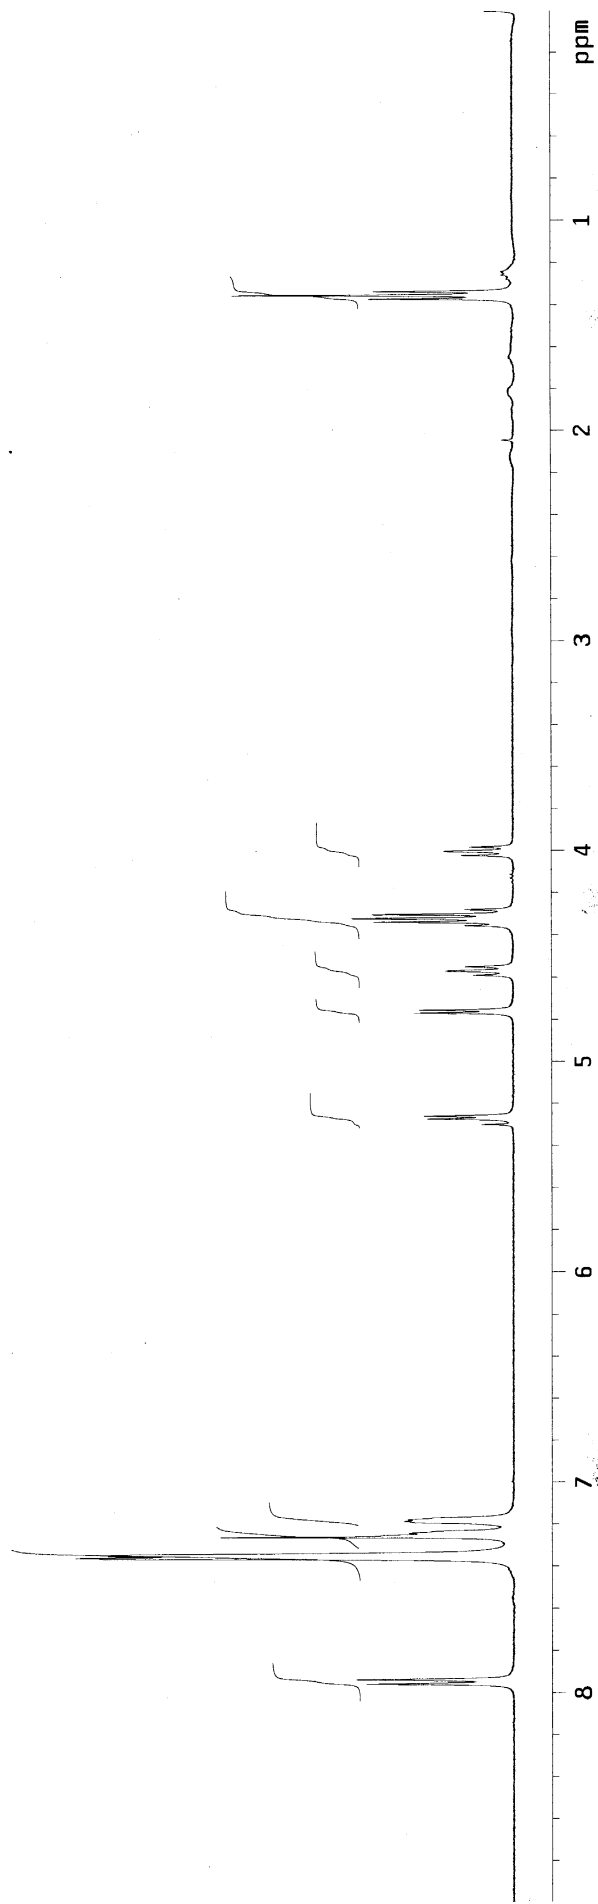

<sup>13</sup>C NMR  
100 MHz, CDCl<sub>3</sub>

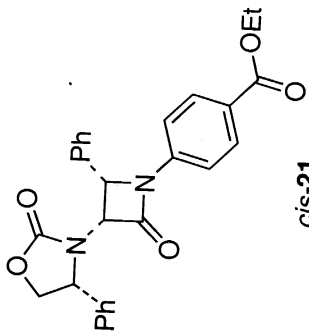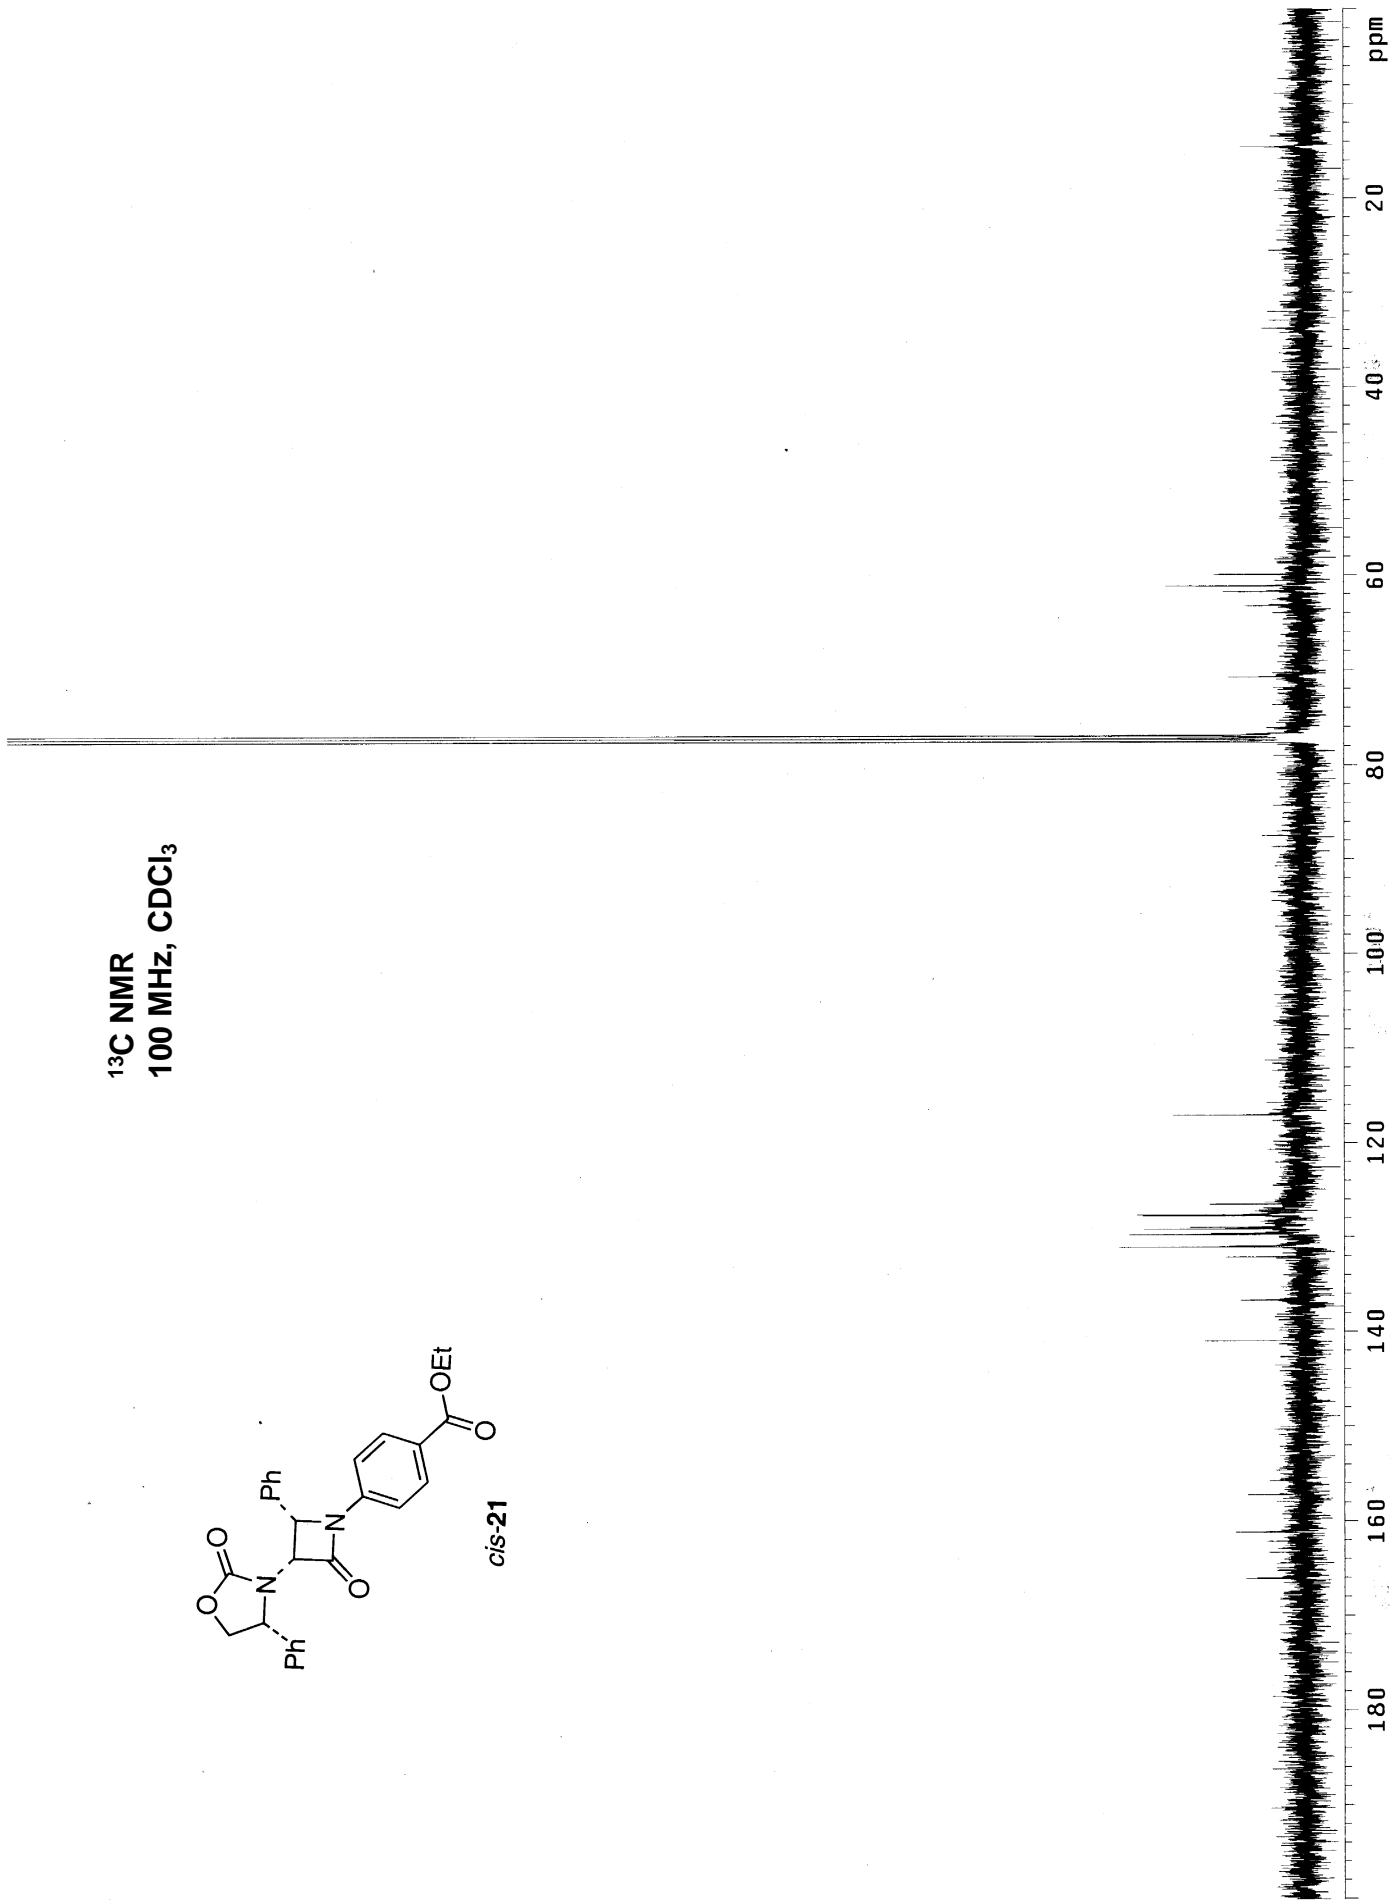

<sup>1</sup>H NMR  
400 MHz, CDCl<sub>3</sub>

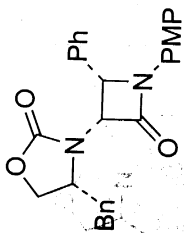

*cis*-22

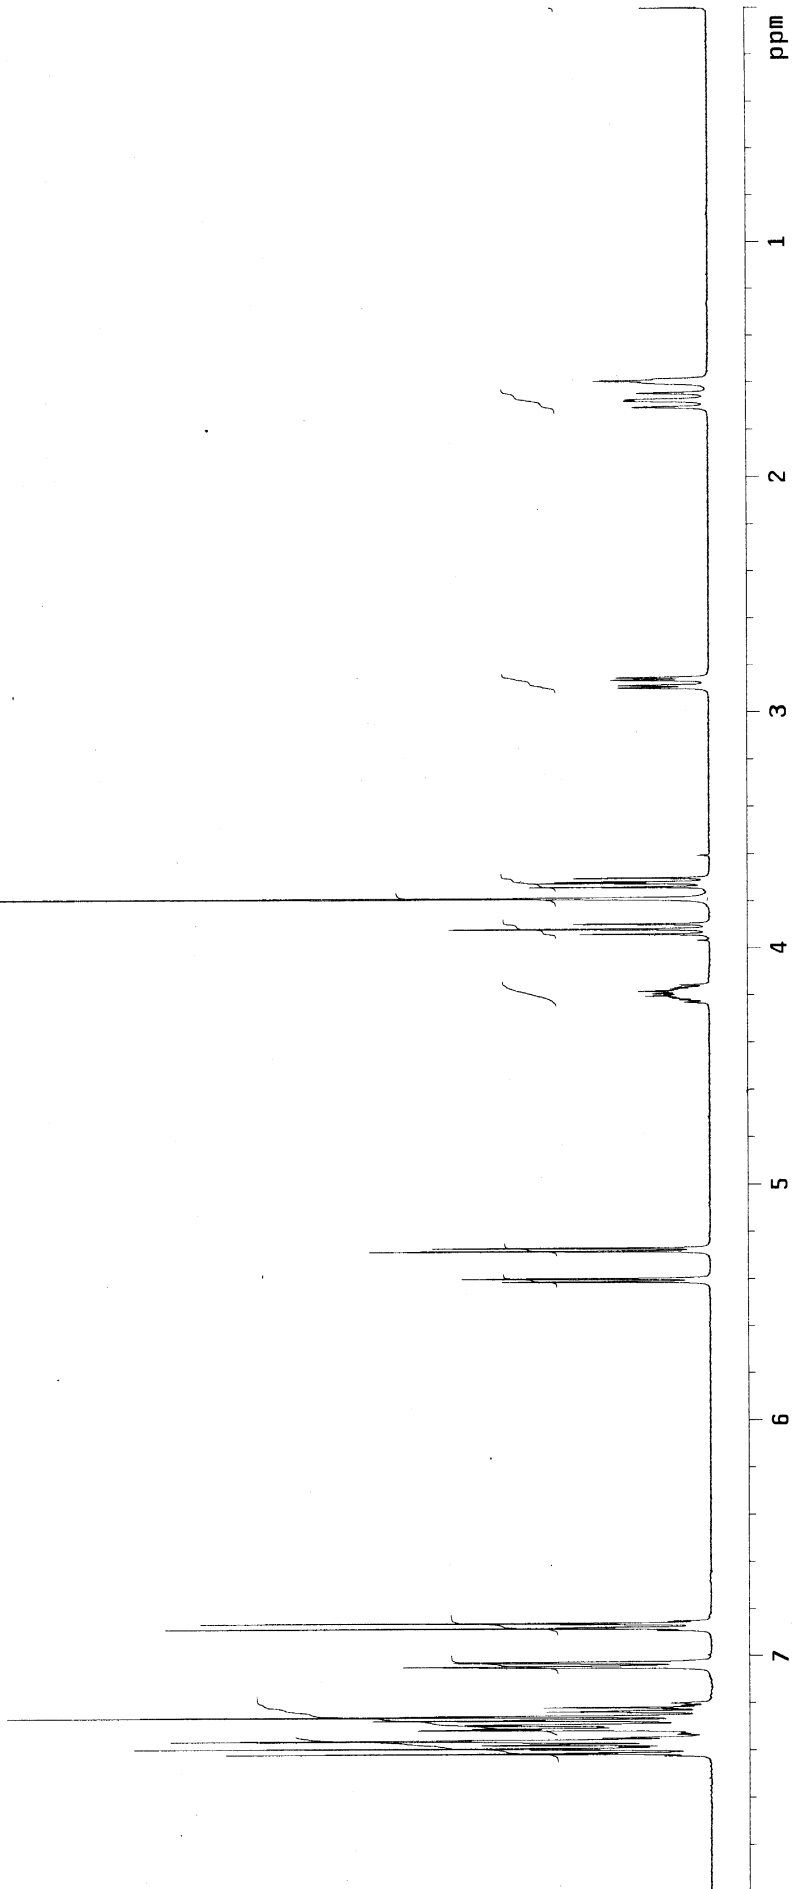

<sup>13</sup>C NMR  
100 MHz, CDCl<sub>3</sub>

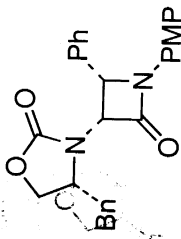

*cis*-22

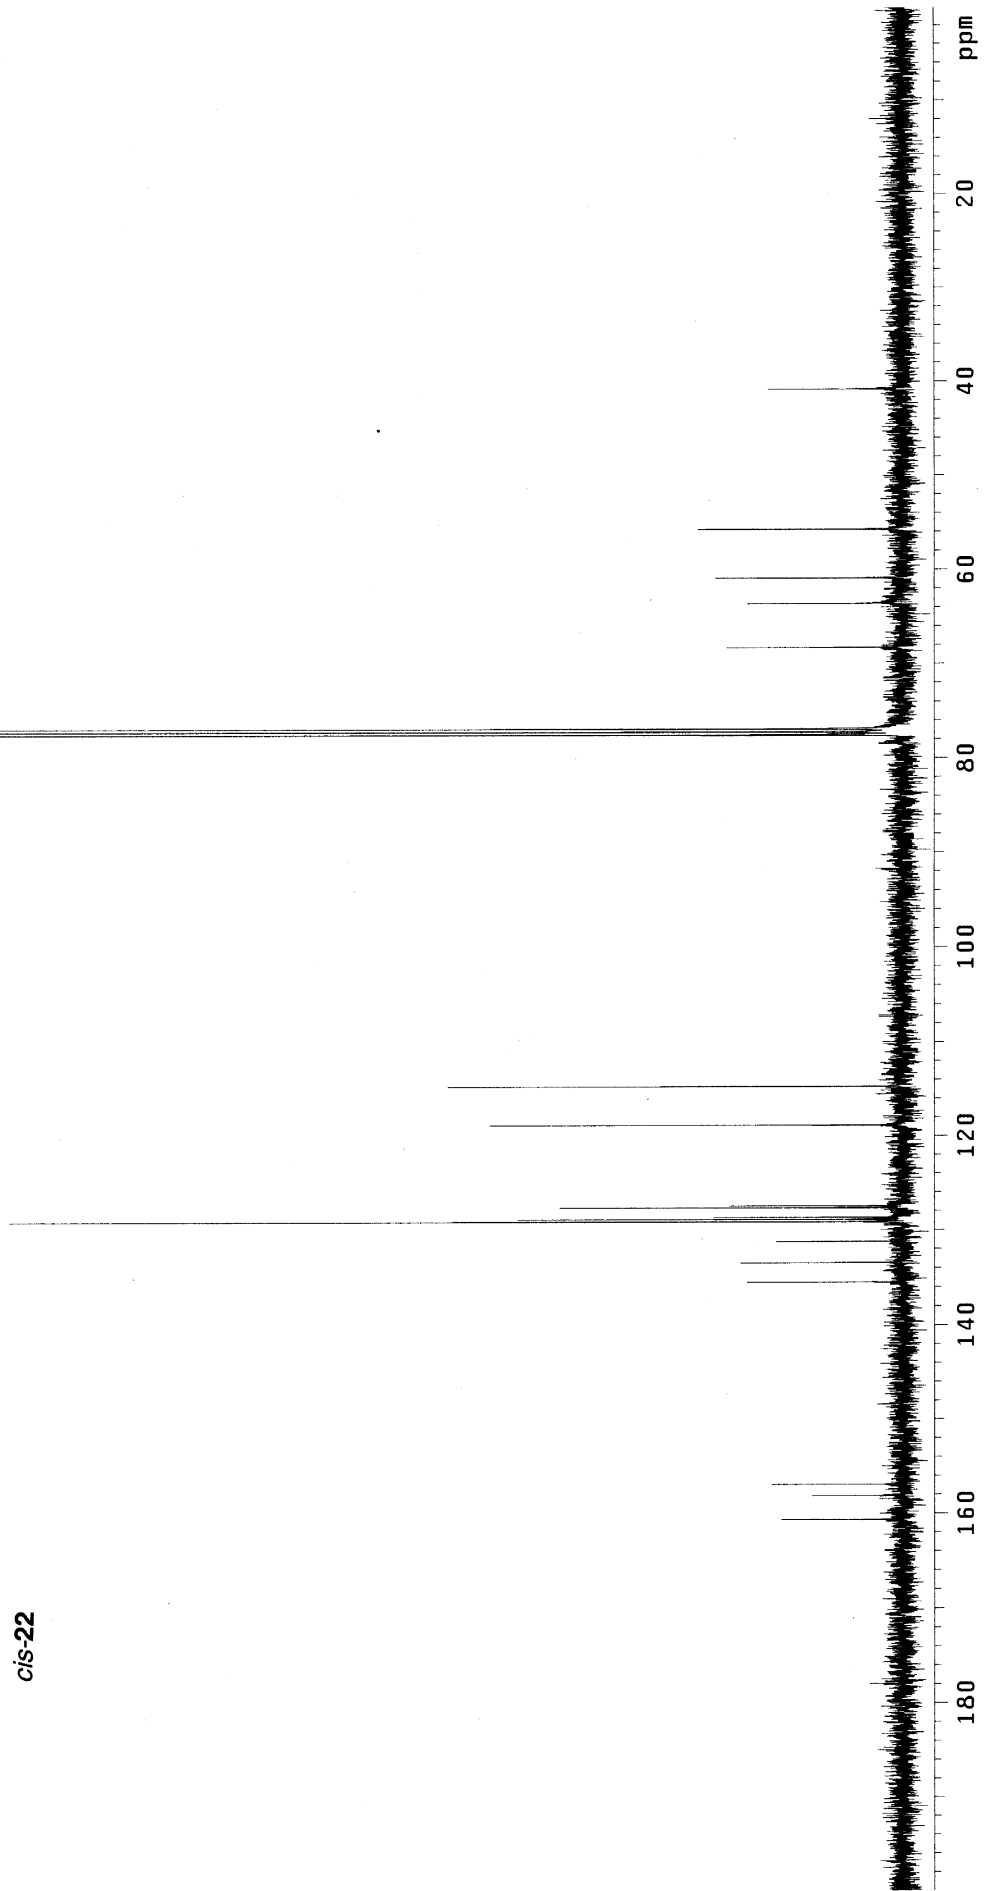

**<sup>1</sup>H NMR  
400 MHz, CDCl<sub>3</sub>**

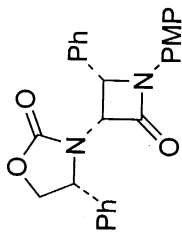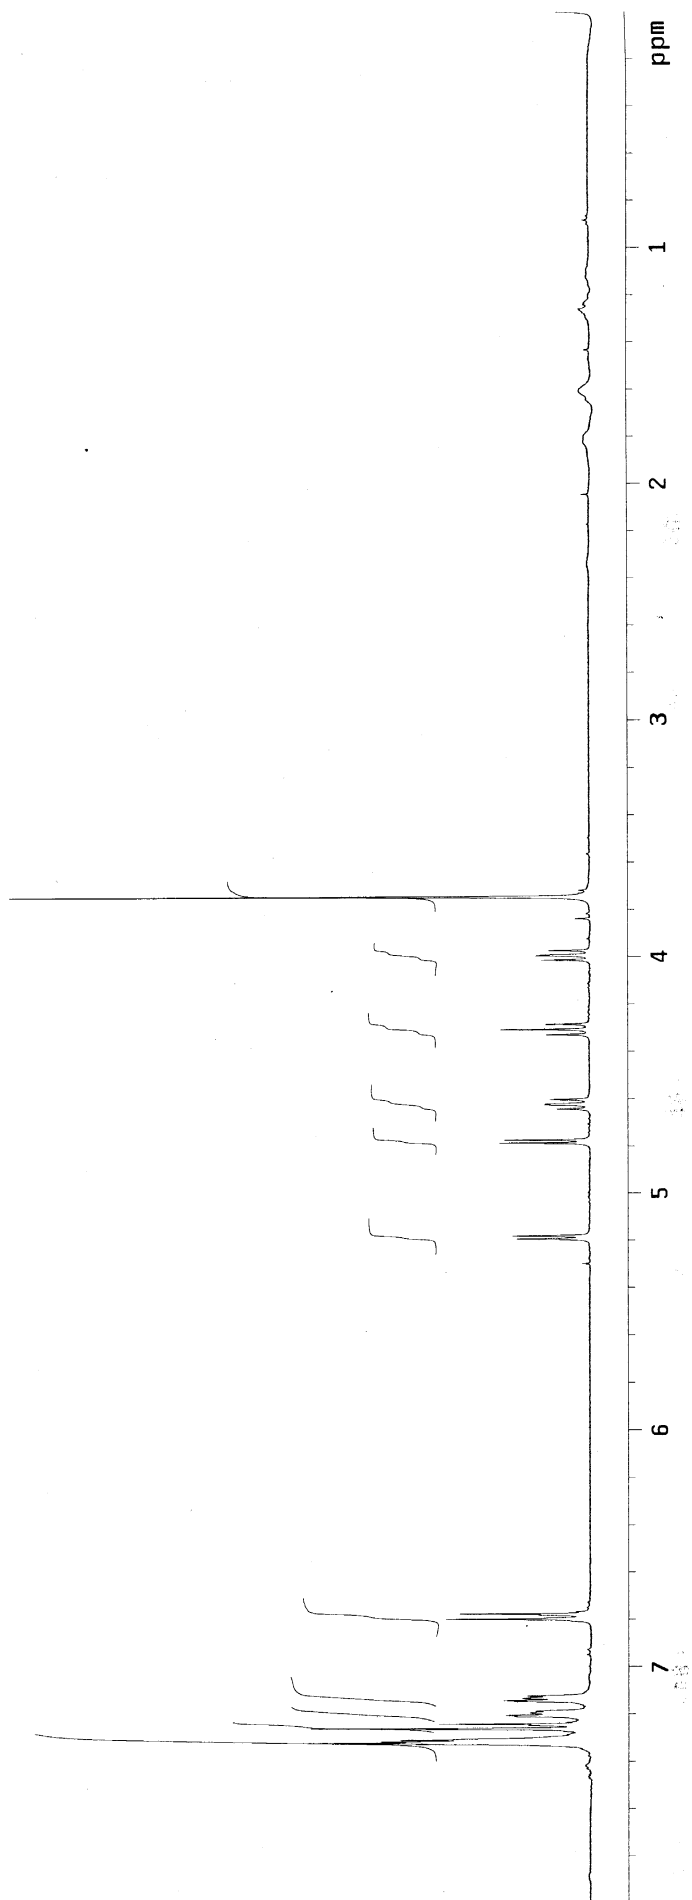

<sup>13</sup>C NMR  
100 MHz, CDCl<sub>3</sub>

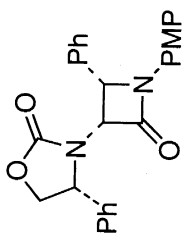

*cis*-23

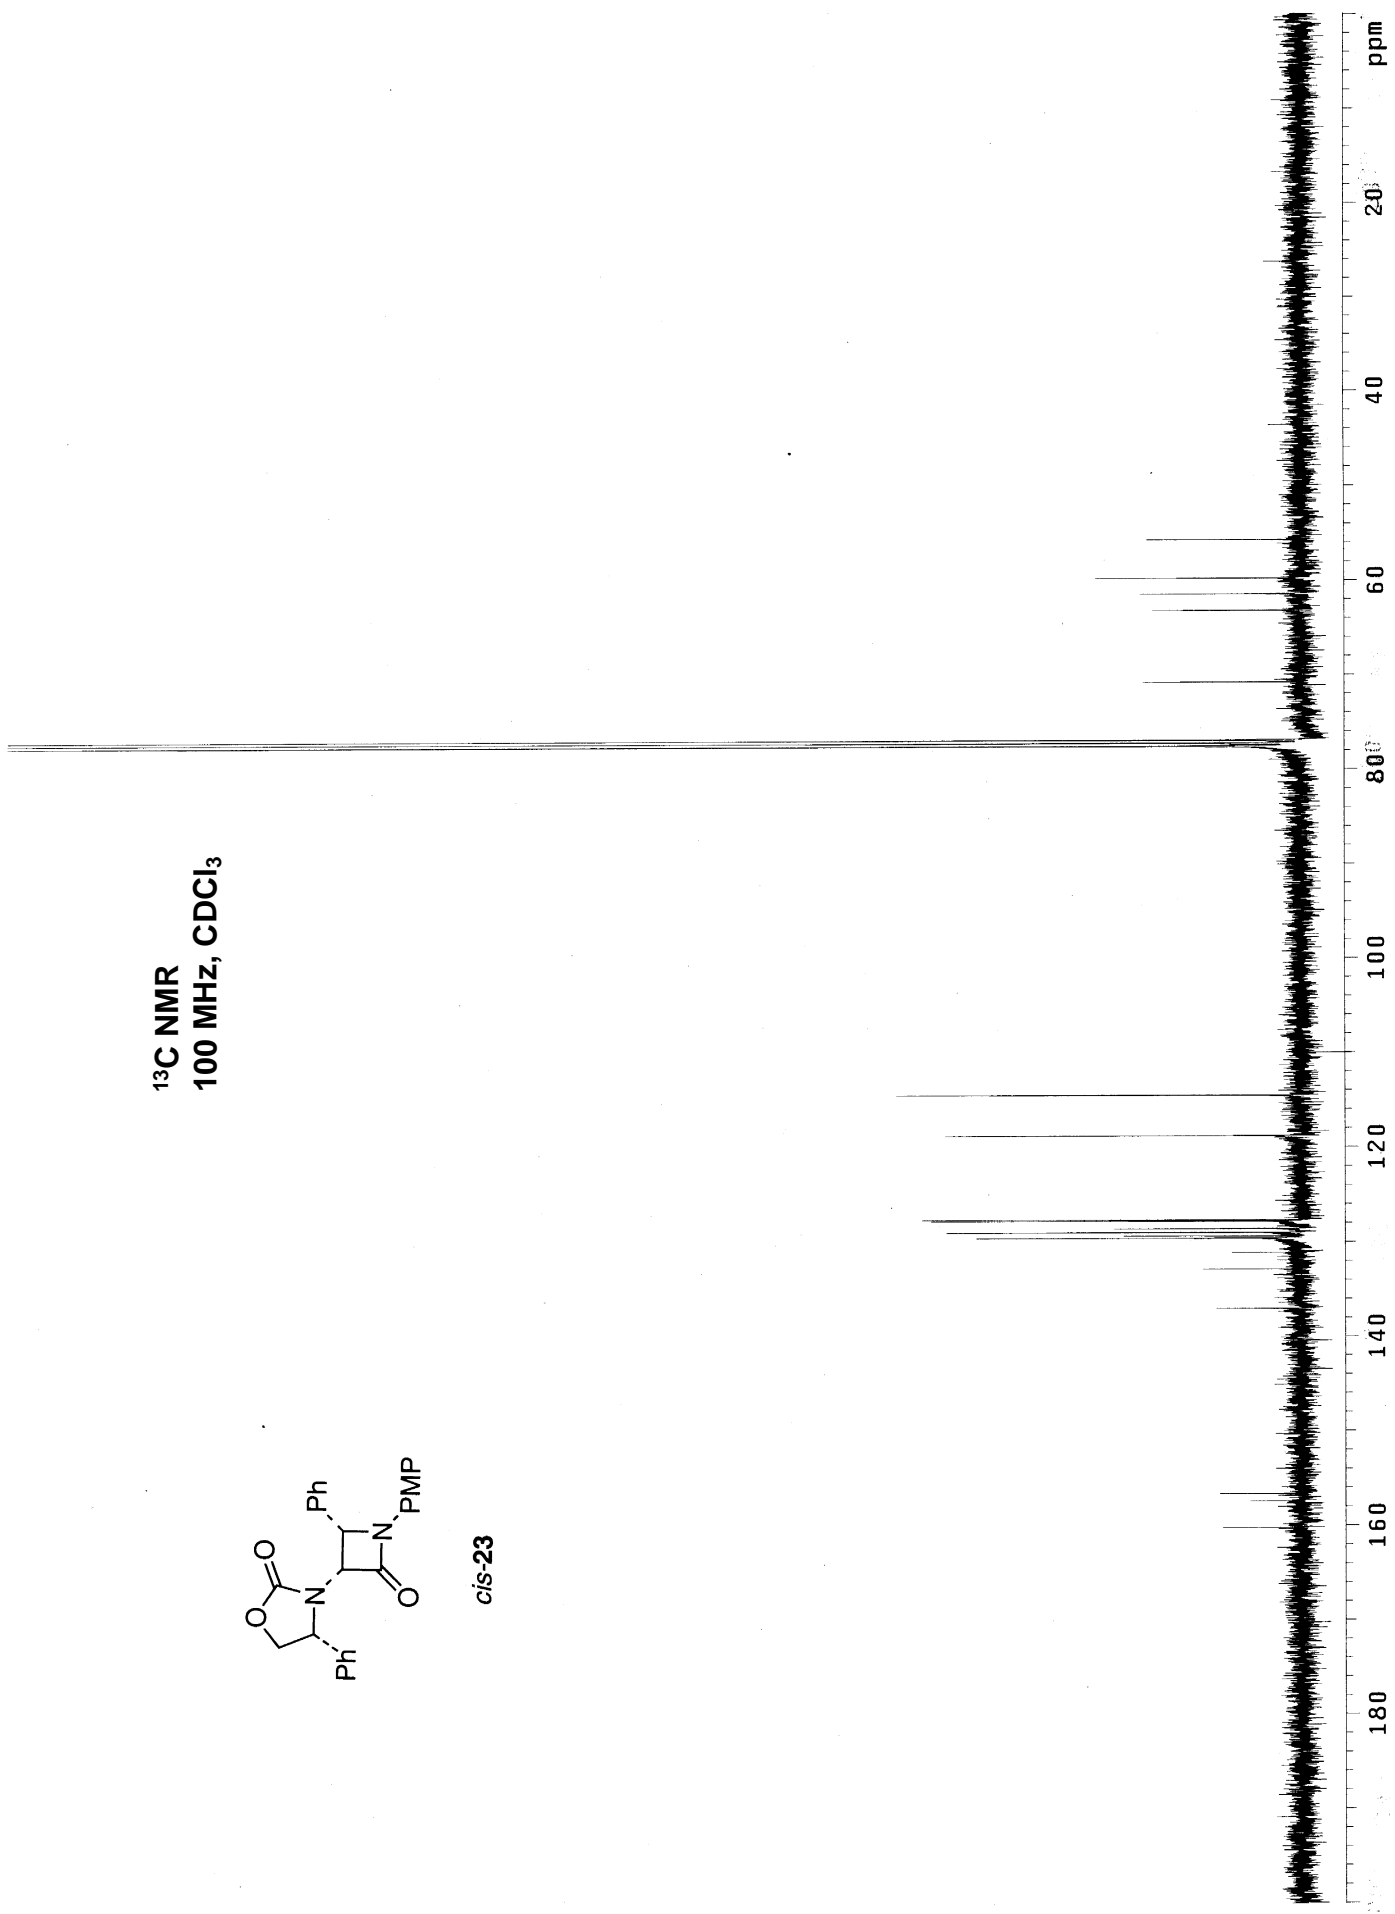

**<sup>1</sup>H NMR**  
**400 MHz, CDCl<sub>3</sub>**

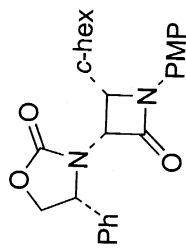

*cis*-24

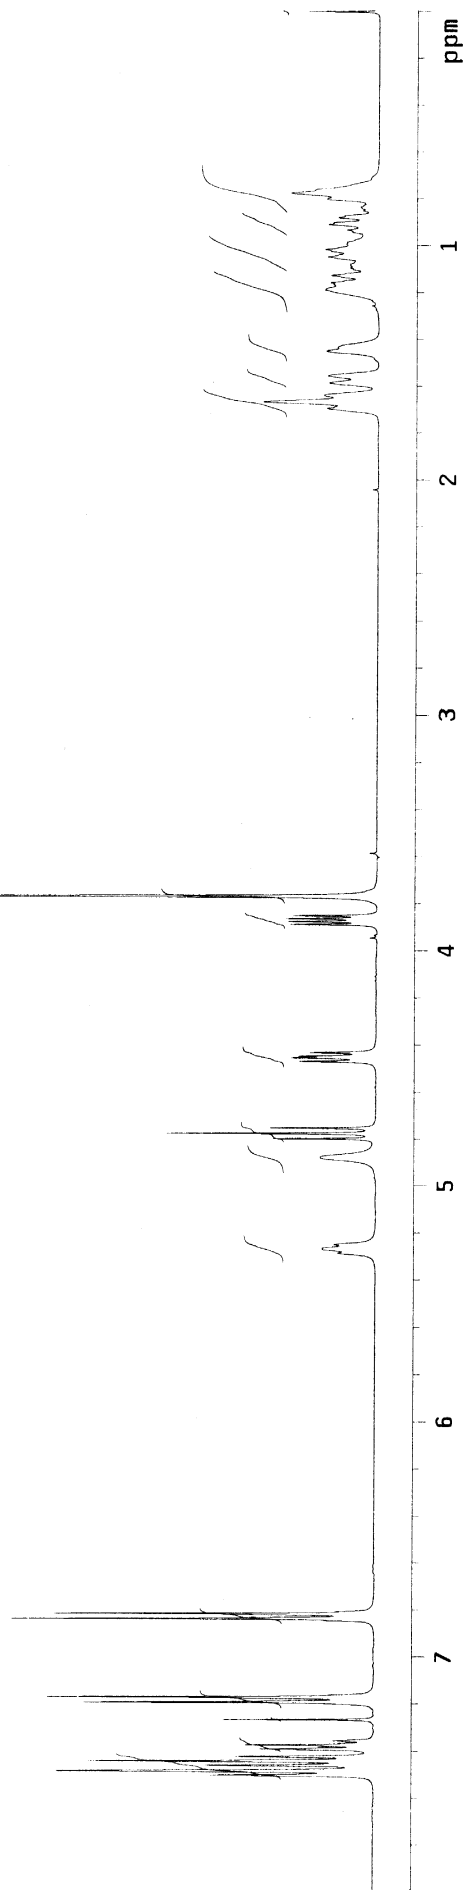



<sup>13</sup>C NMR  
125 MHz, CDCl<sub>3</sub>

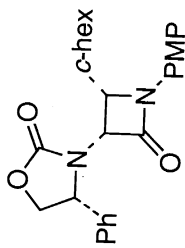

*cis*-24

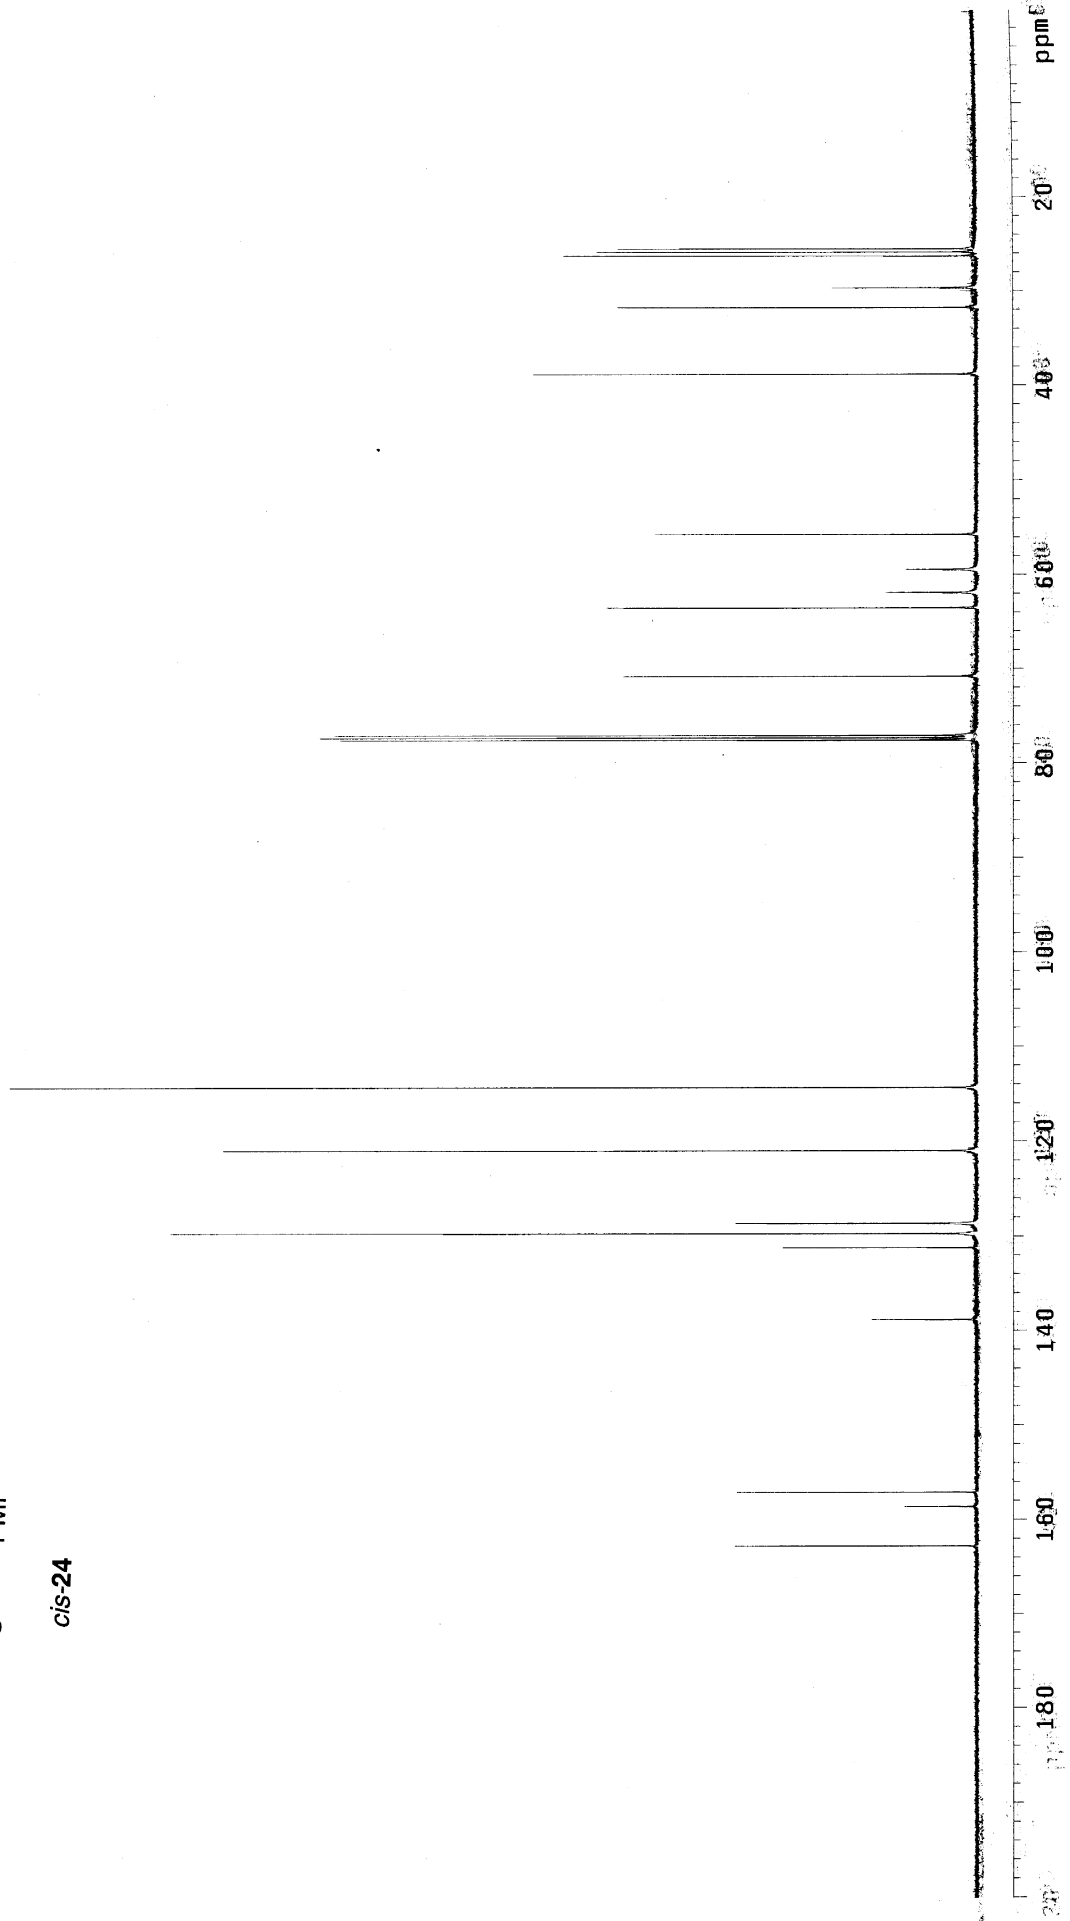

<sup>1</sup>H NMR  
400 MHz, CDCl<sub>3</sub>

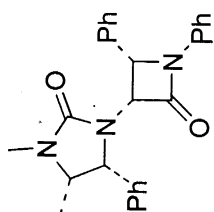

*cis*-25

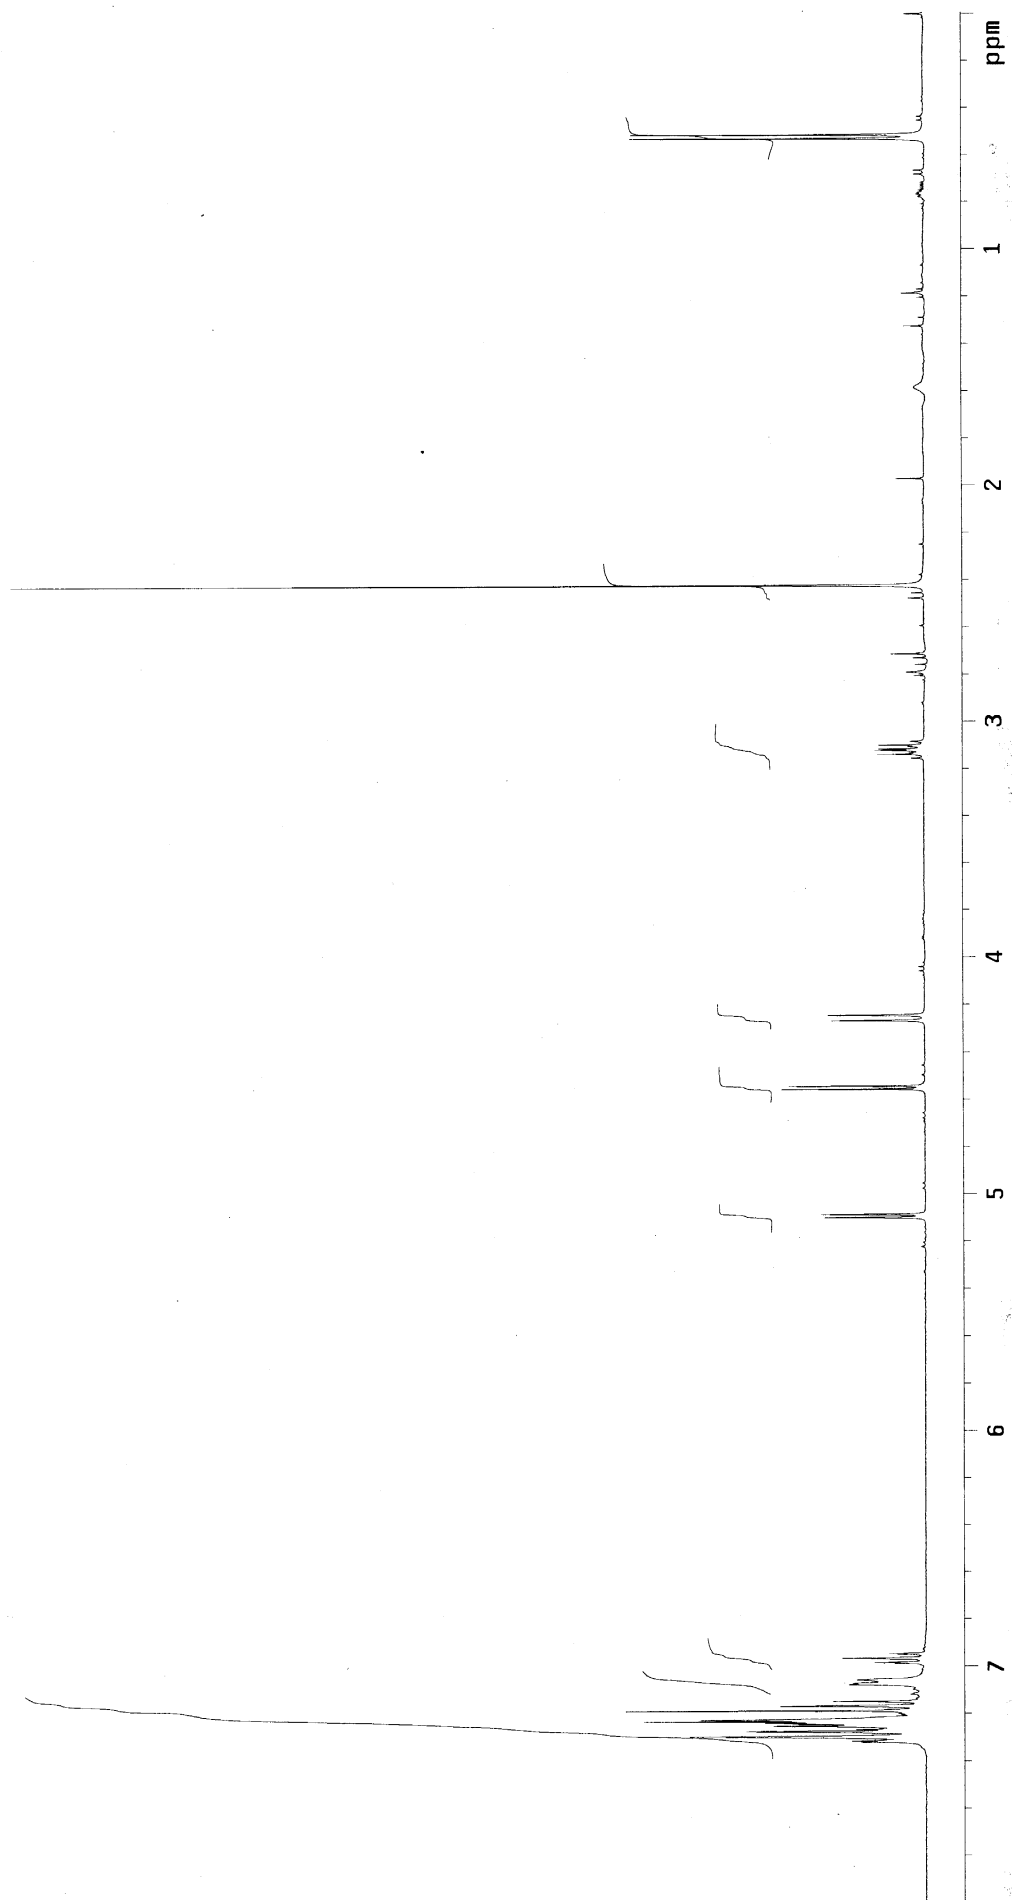

<sup>13</sup>C NMR  
100 MHz, CDCl<sub>3</sub>

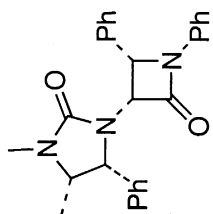

*cis*-25

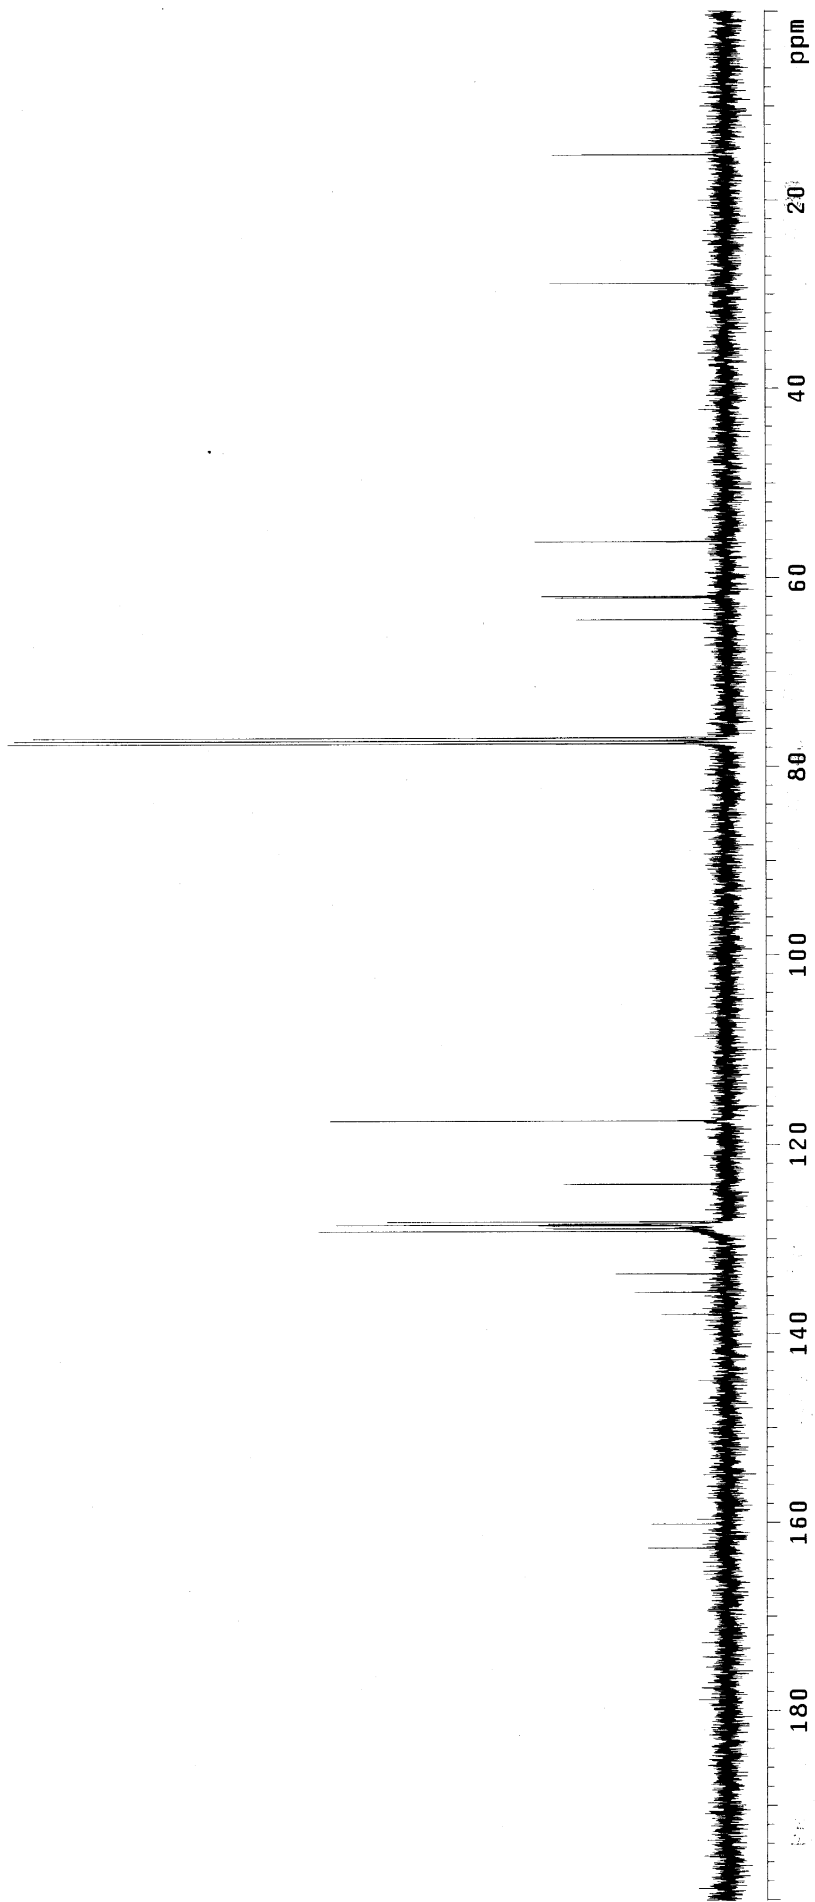

<sup>1</sup>H NMR  
400 MHz, CDCl<sub>3</sub>

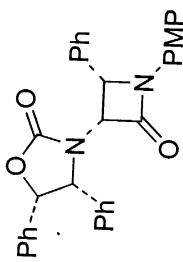

*cis*-26

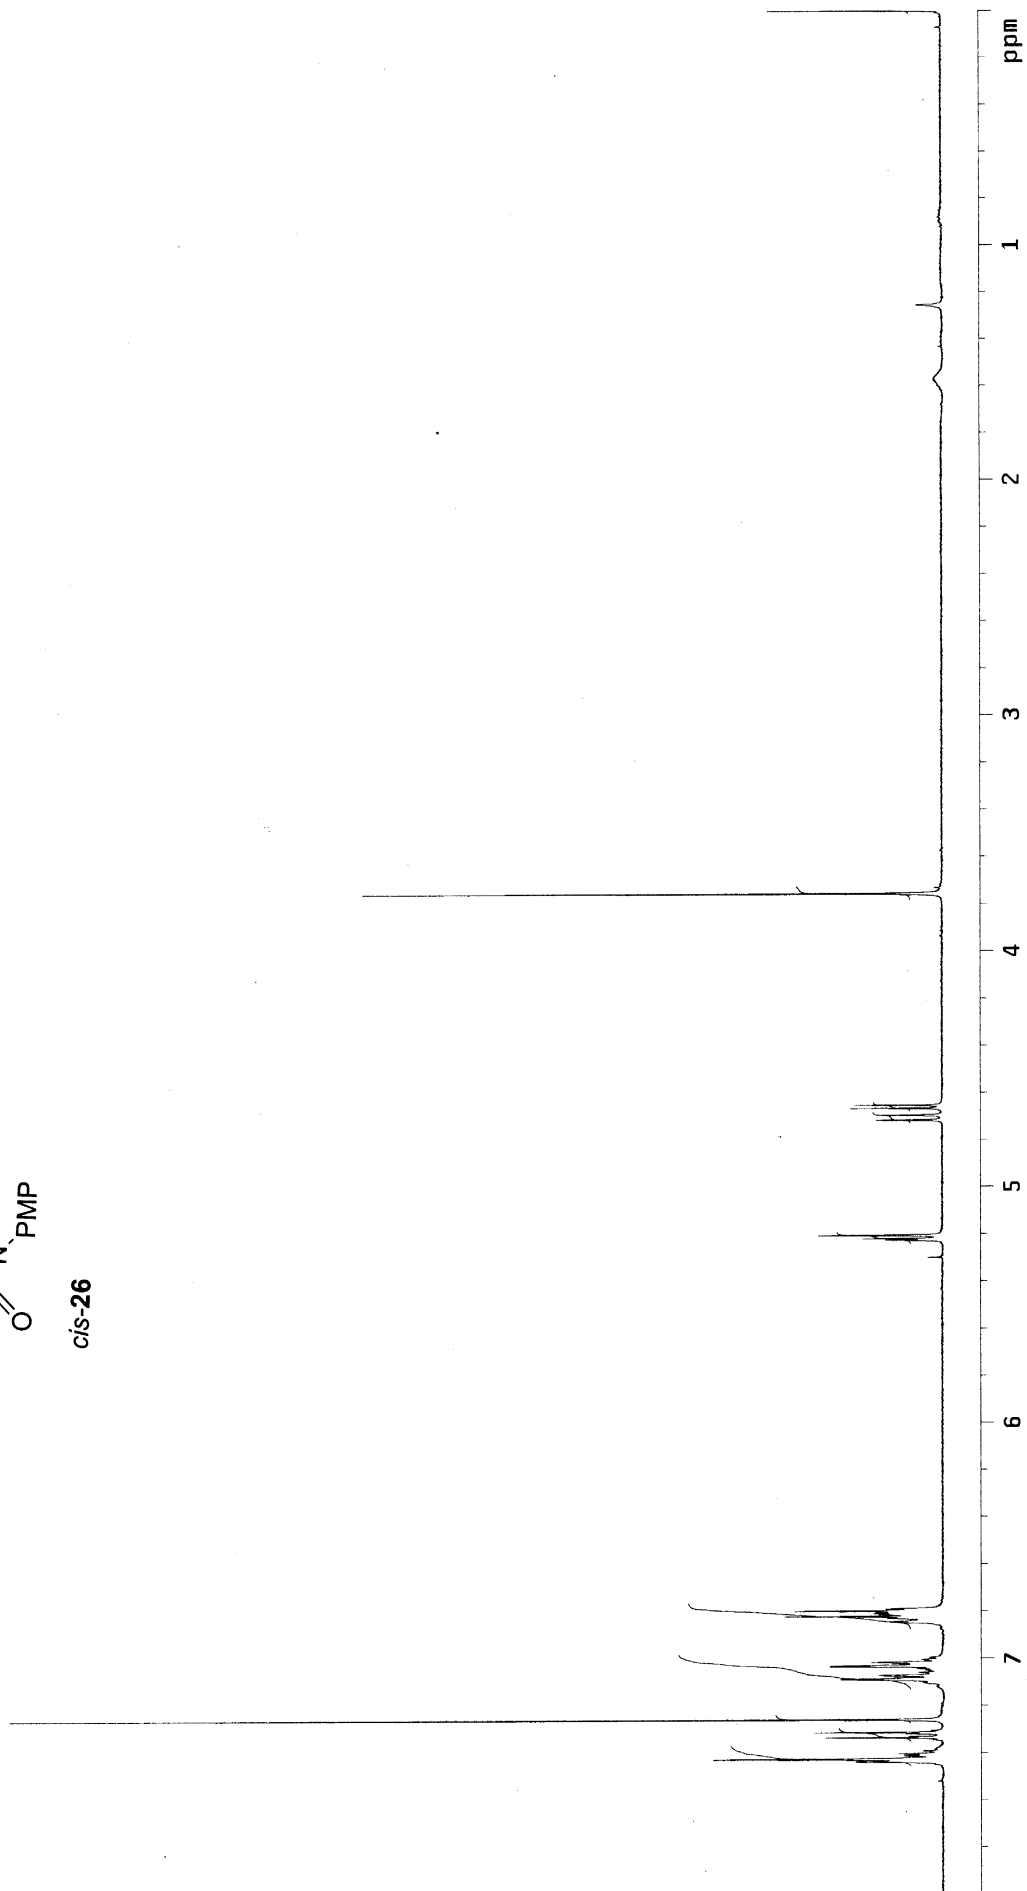

<sup>13</sup>C NMR  
100 MHz, CD<sub>2</sub>Cl<sub>2</sub>

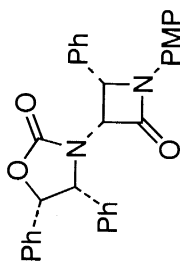

*cis*-26

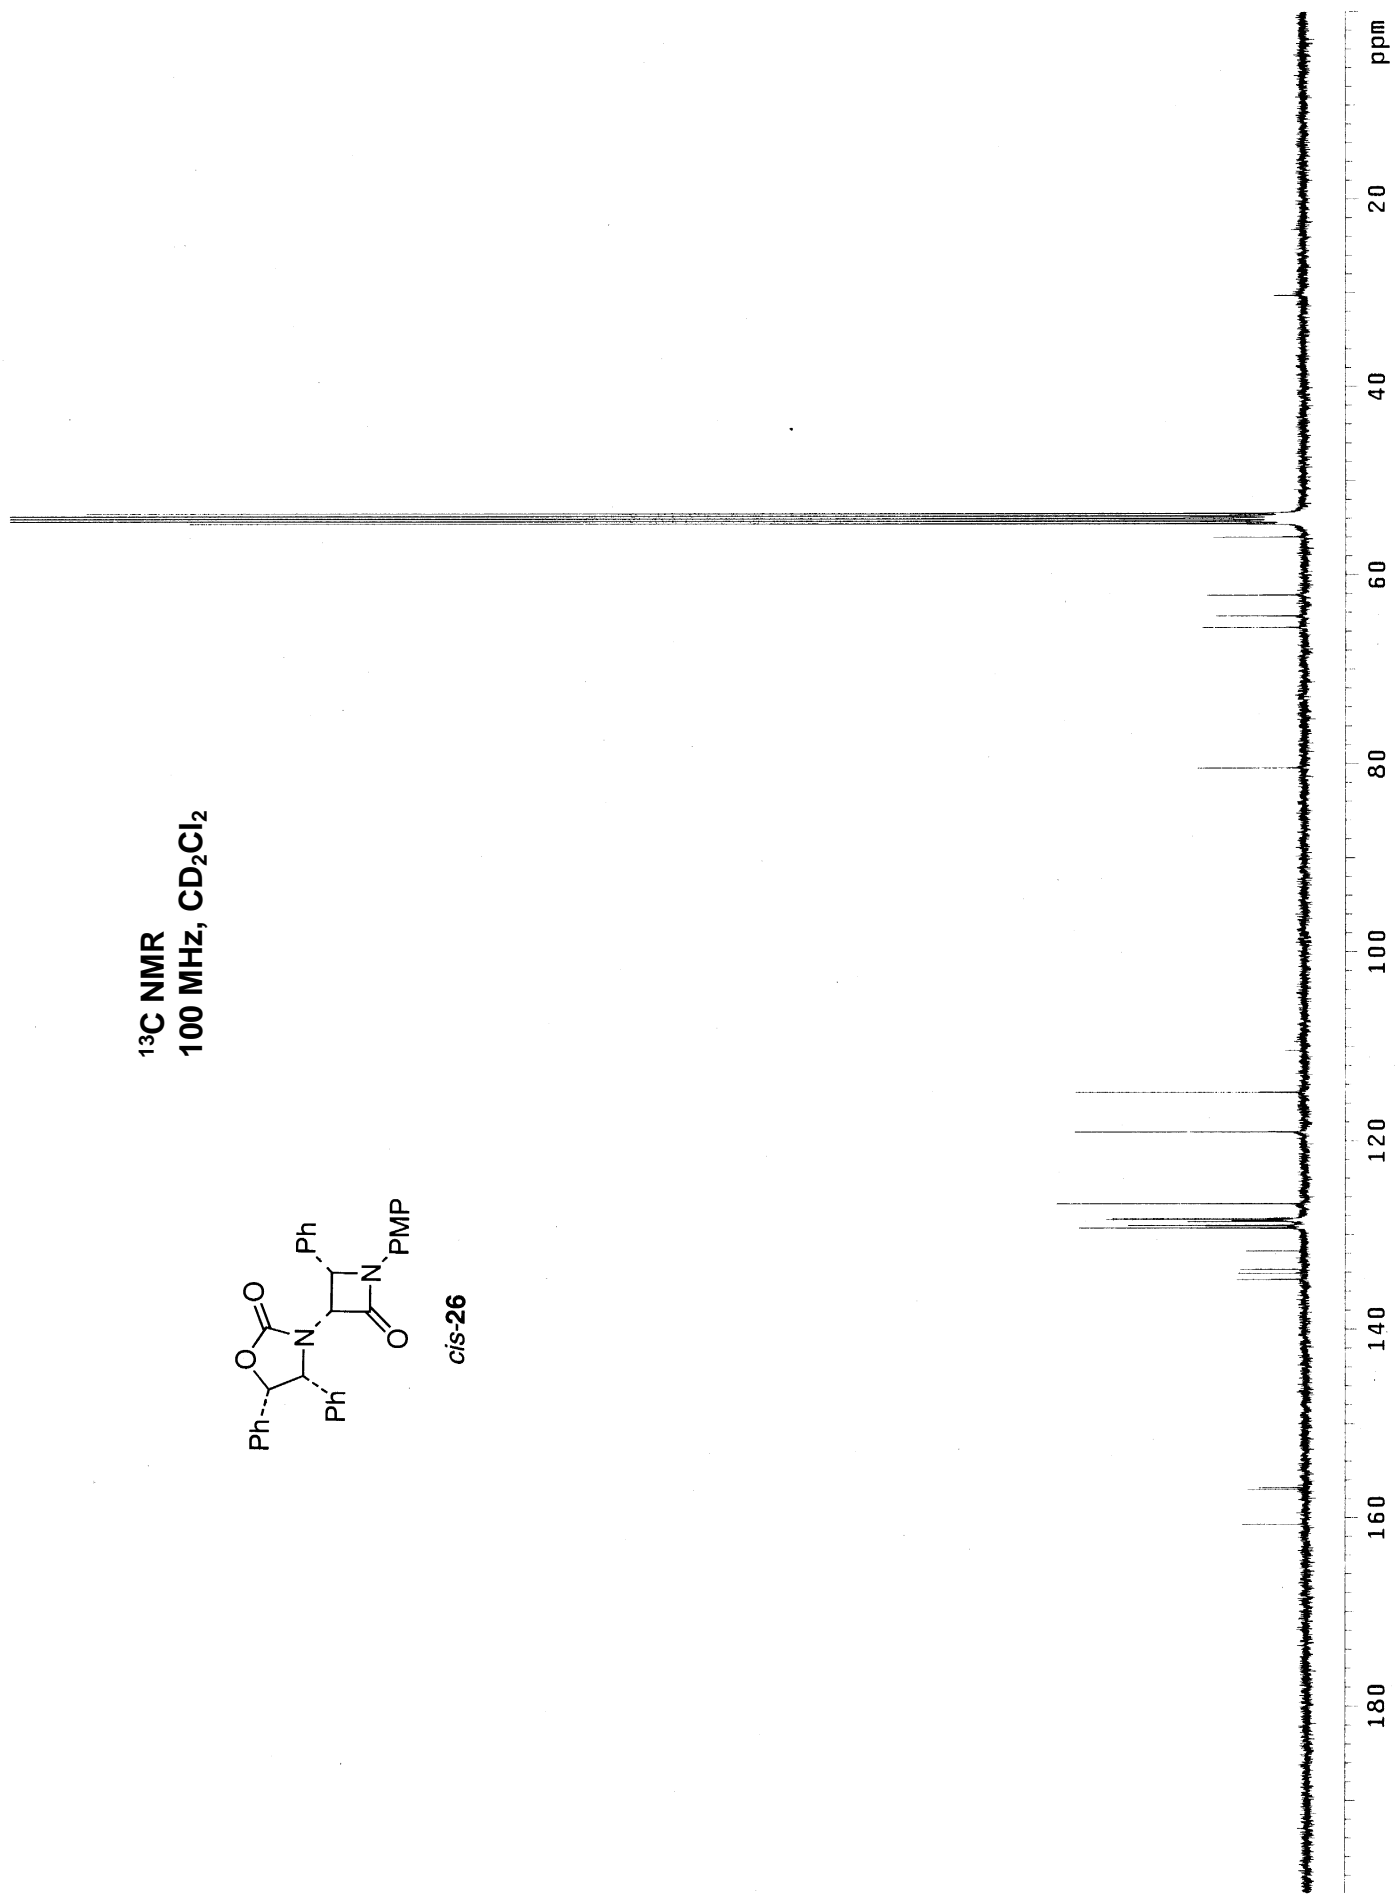

**<sup>1</sup>H NMR**  
**500 MHz, CDCl<sub>3</sub>**

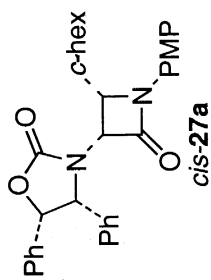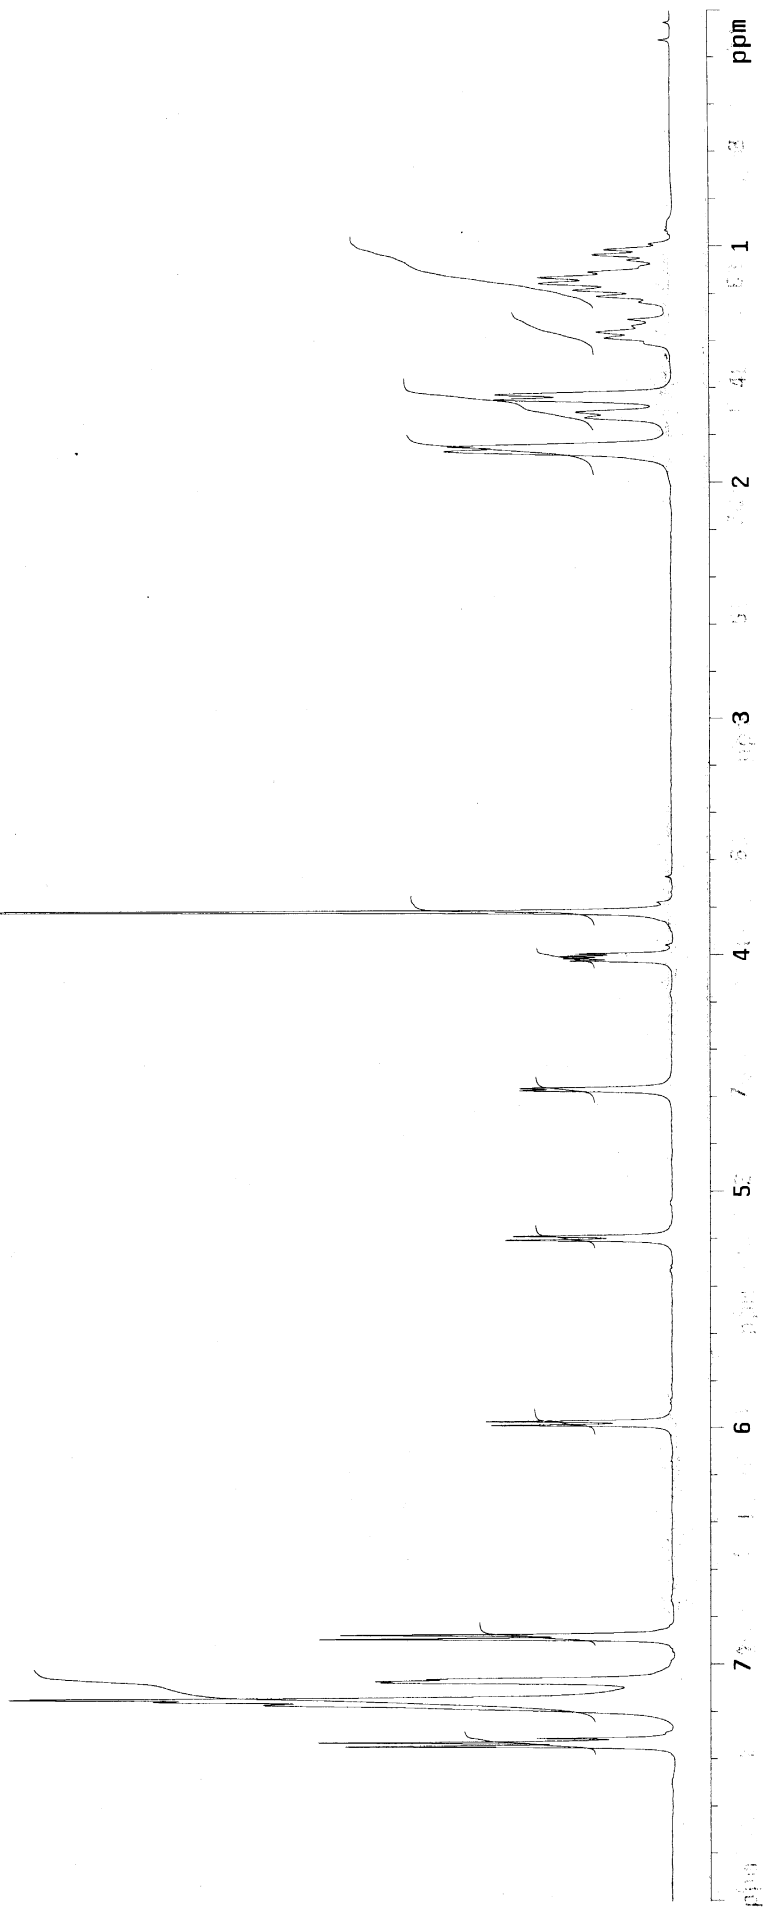

<sup>13</sup>C NMR  
125 MHz, CDCl<sub>3</sub>

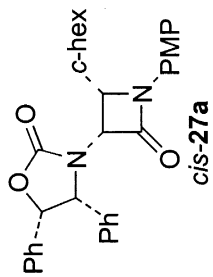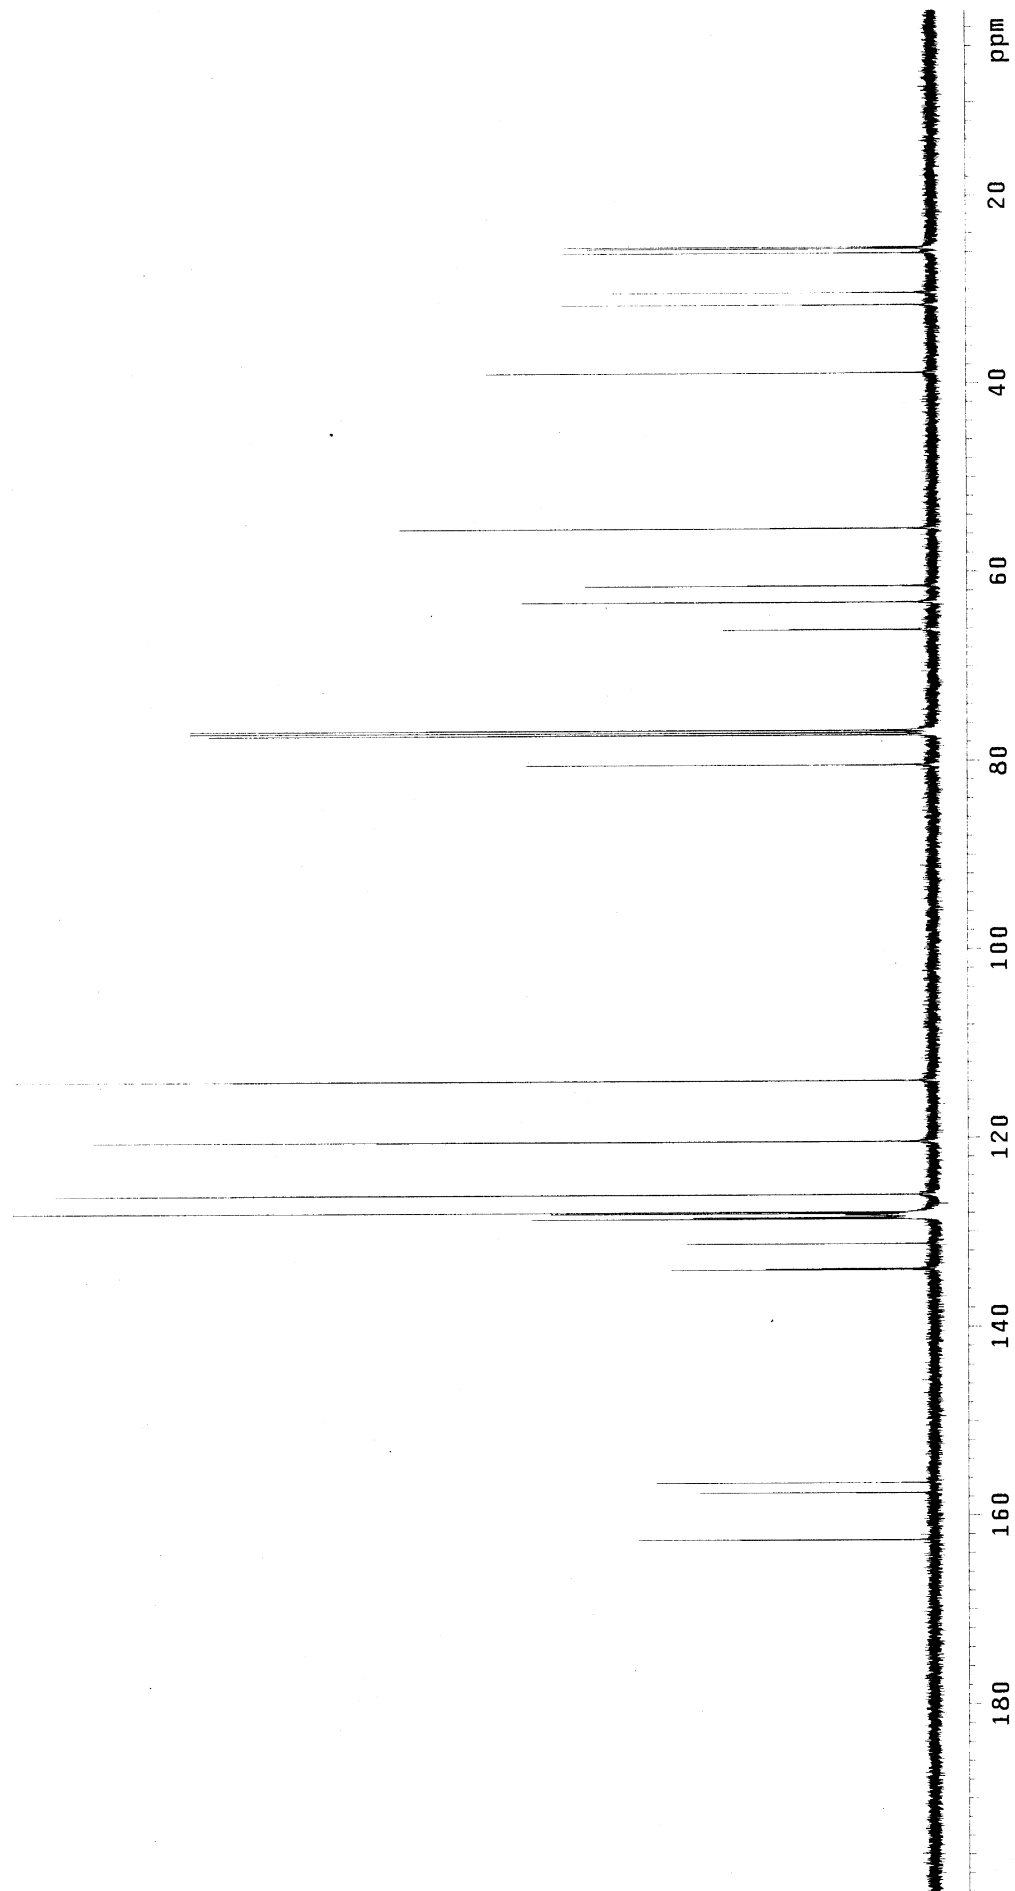

<sup>1</sup>H NMR  
400 MHz, CDCl<sub>3</sub>

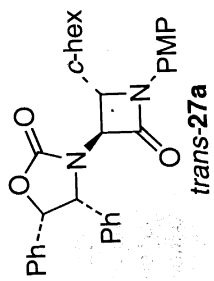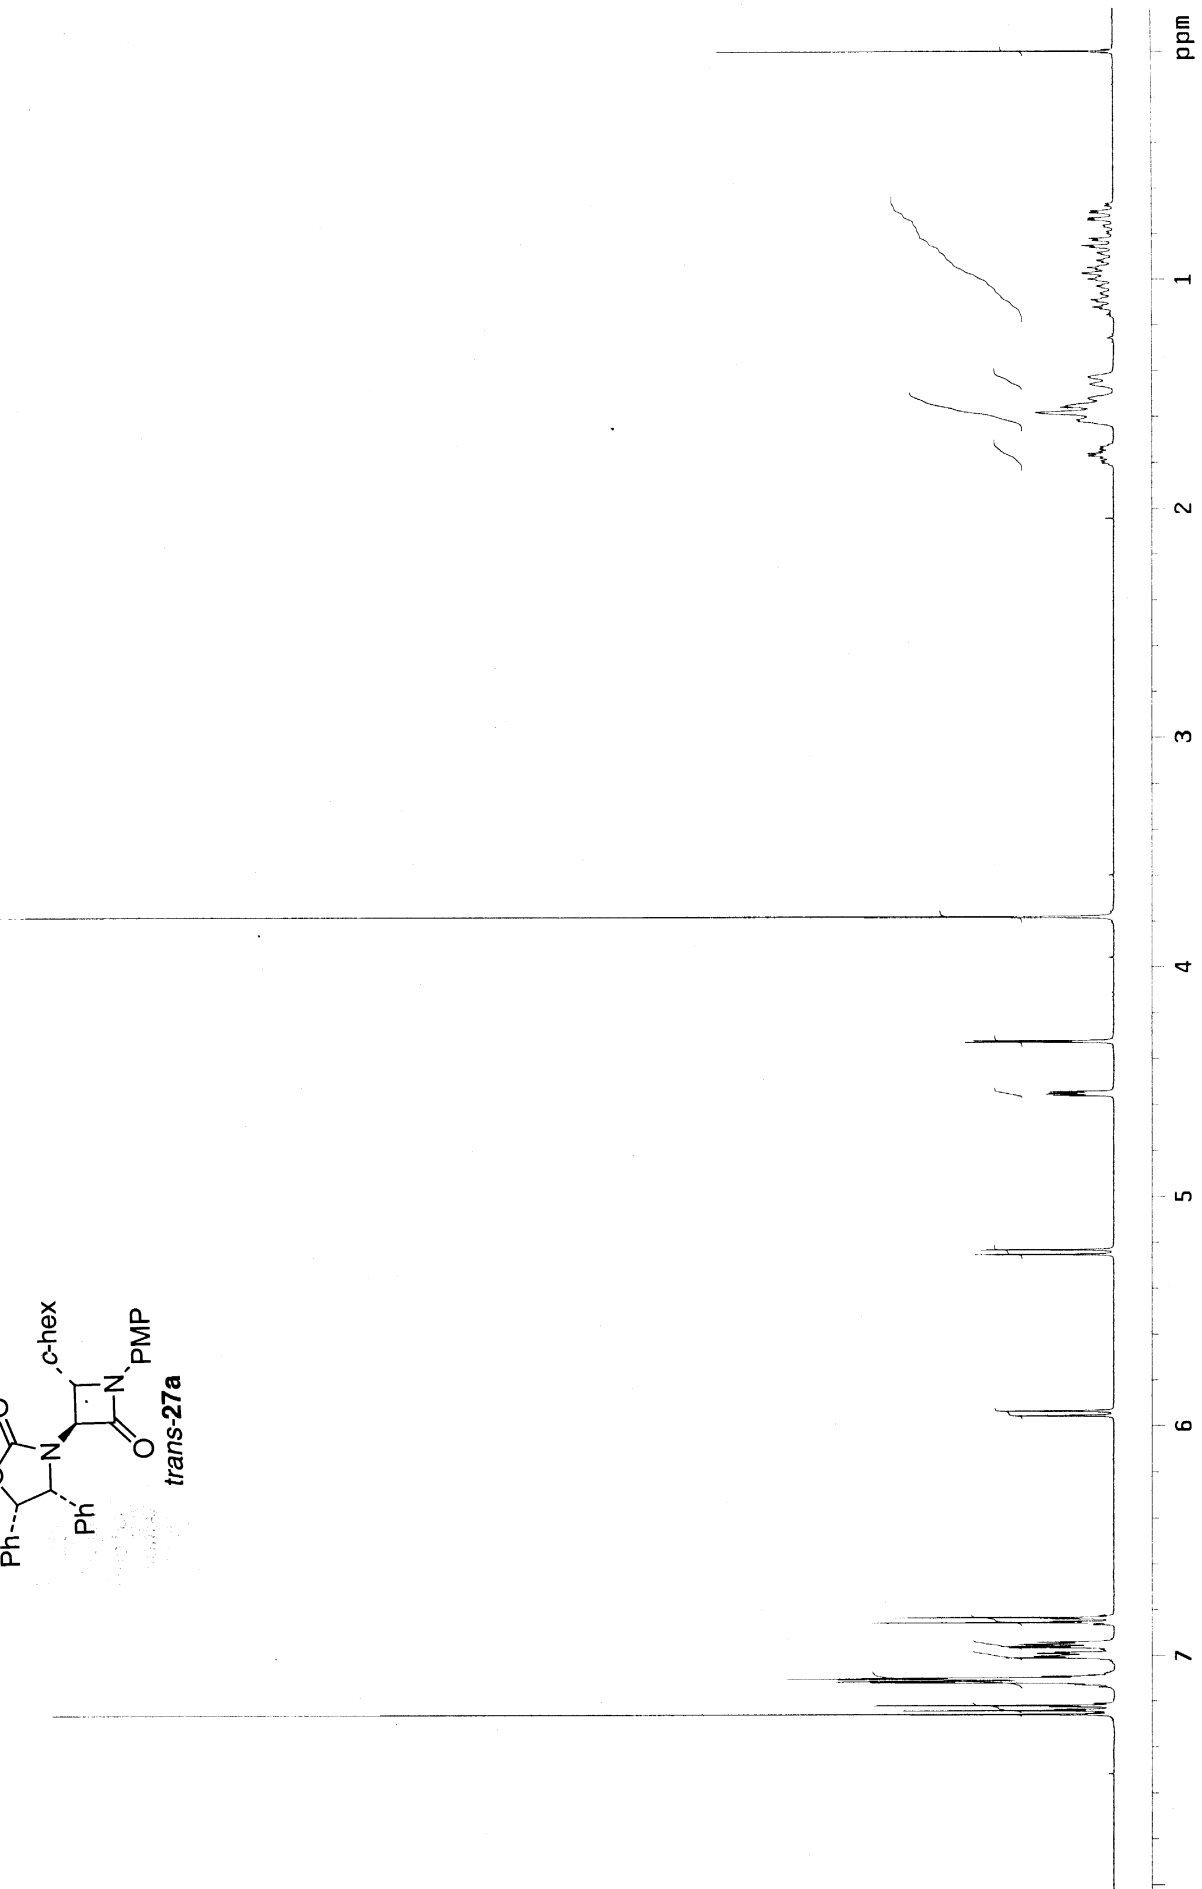



<sup>13</sup>C NMR  
125 MHz, CDCl<sub>3</sub>

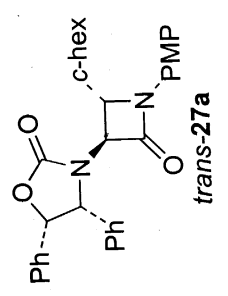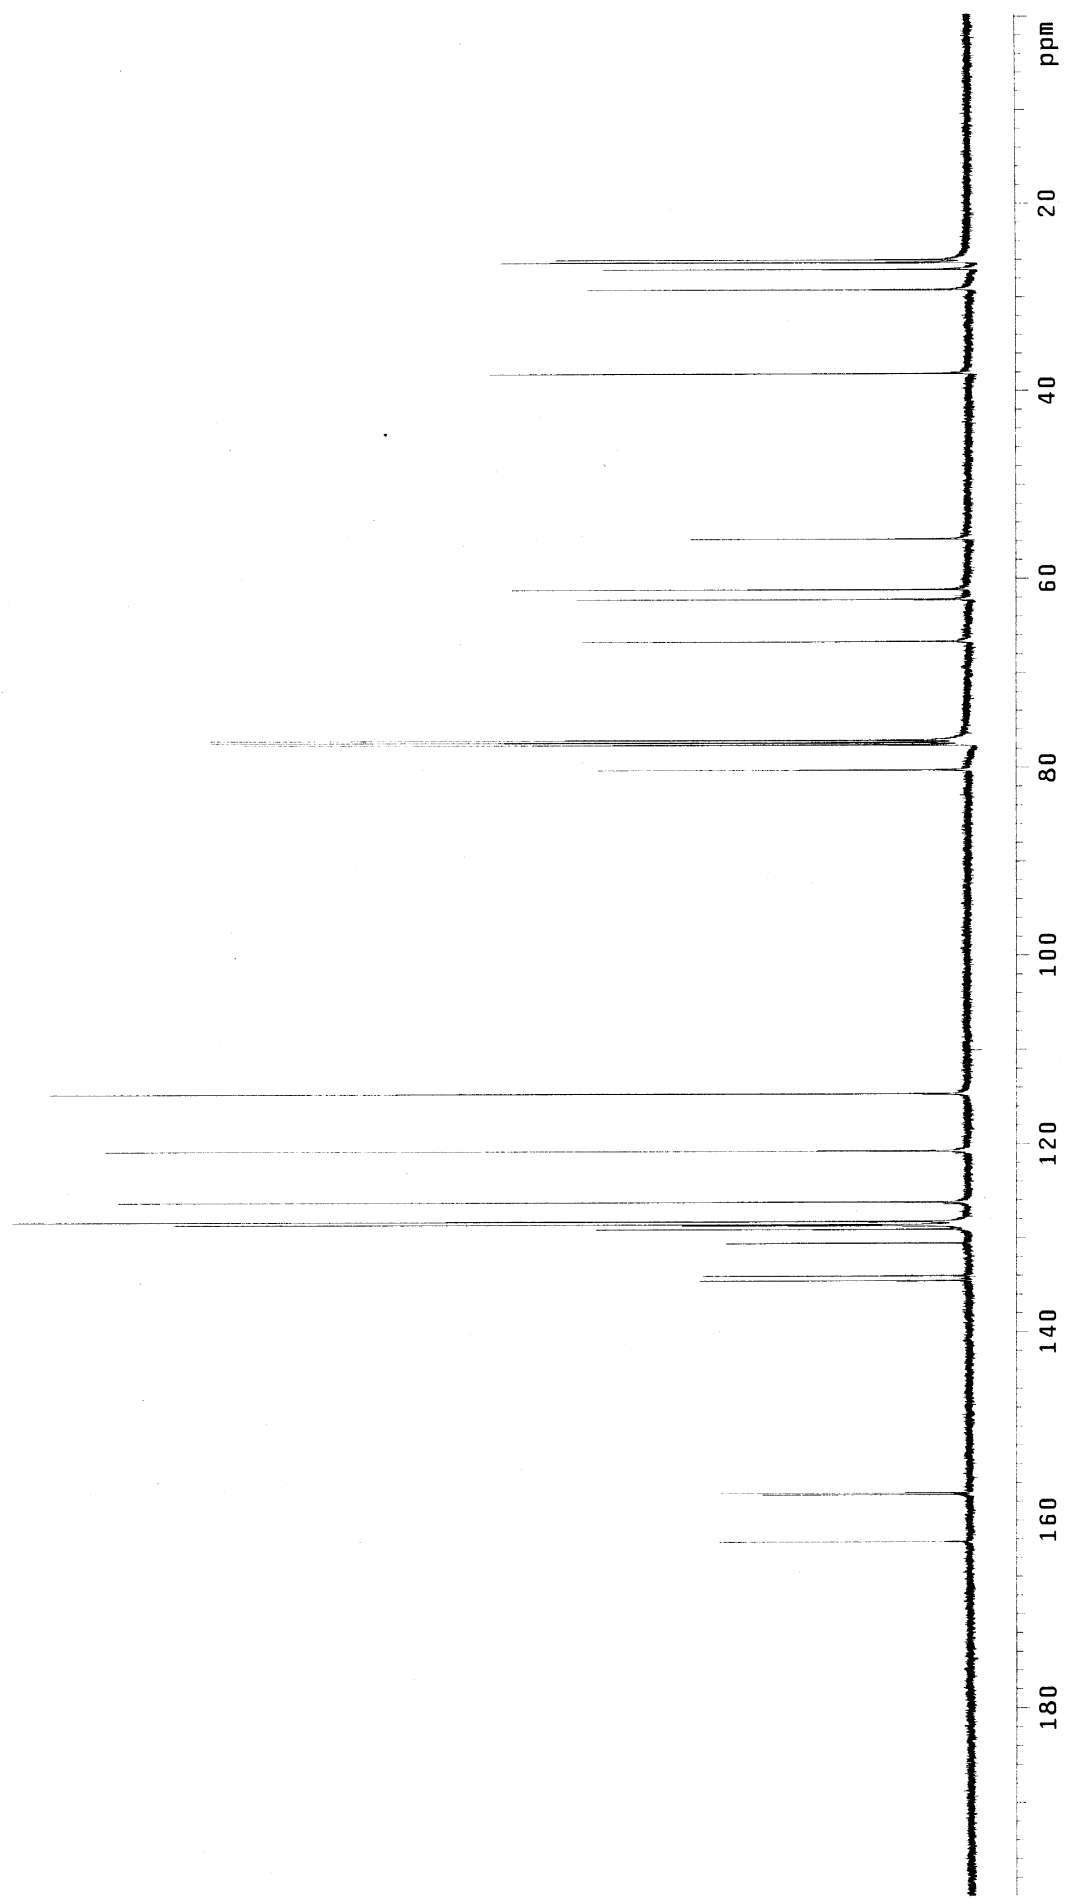

**<sup>1</sup>H NMR**  
**500 MHz, CDCl<sub>3</sub>**

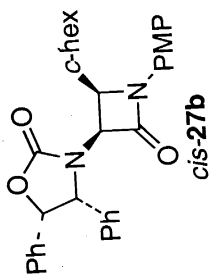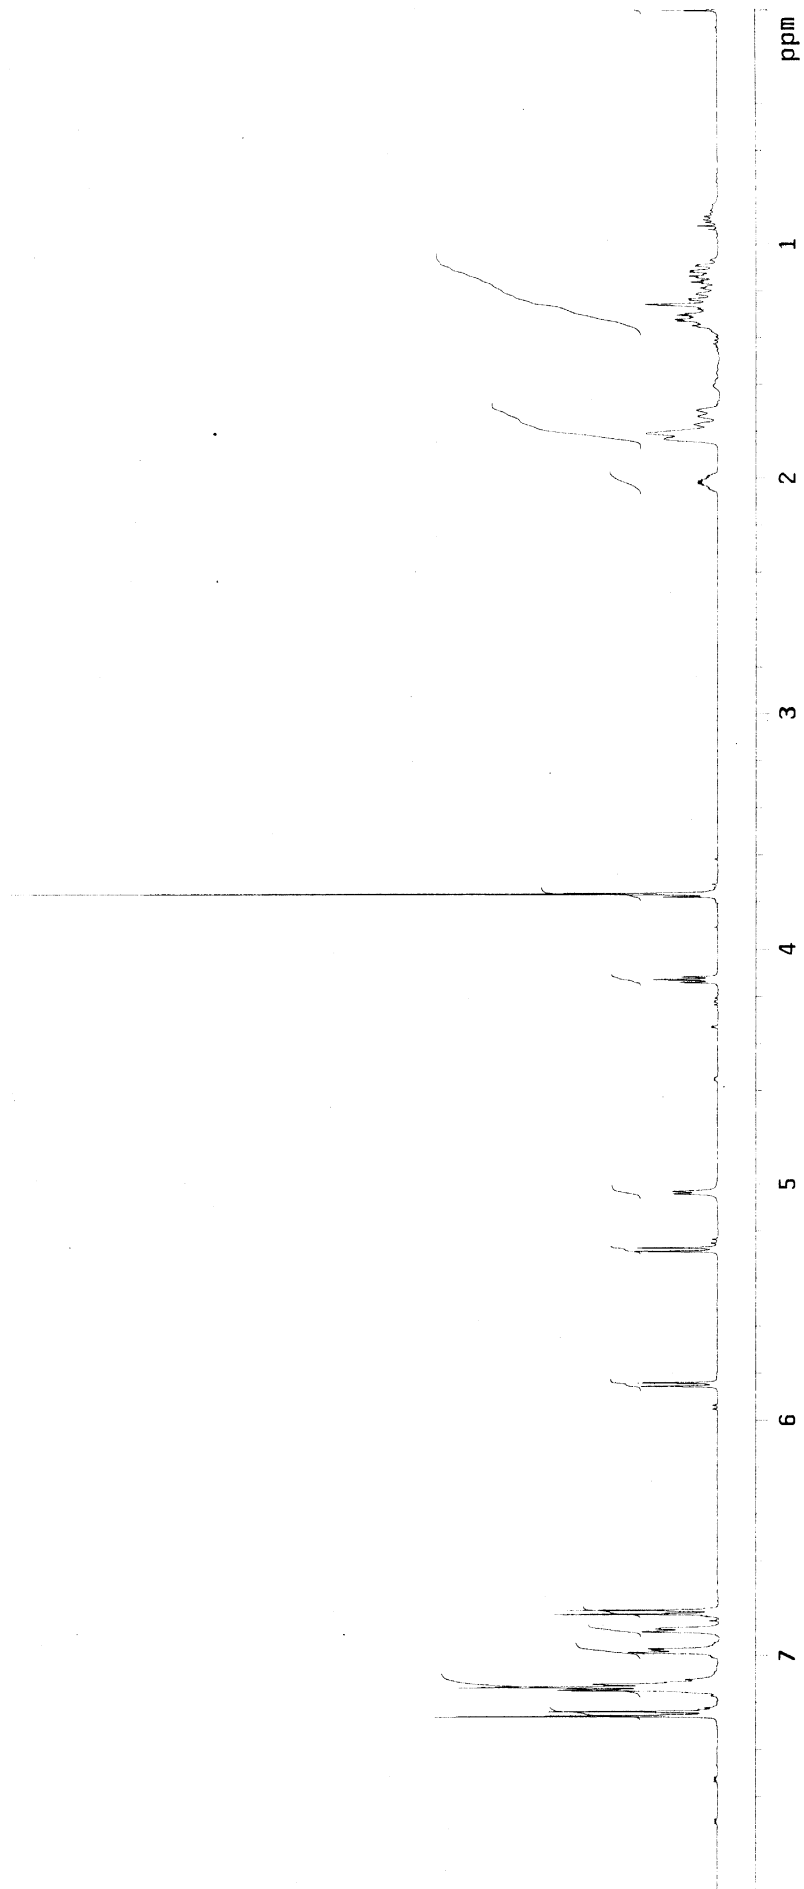

**<sup>13</sup>C NMR**  
**100 MHz, CDCl<sub>3</sub>**

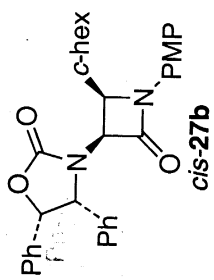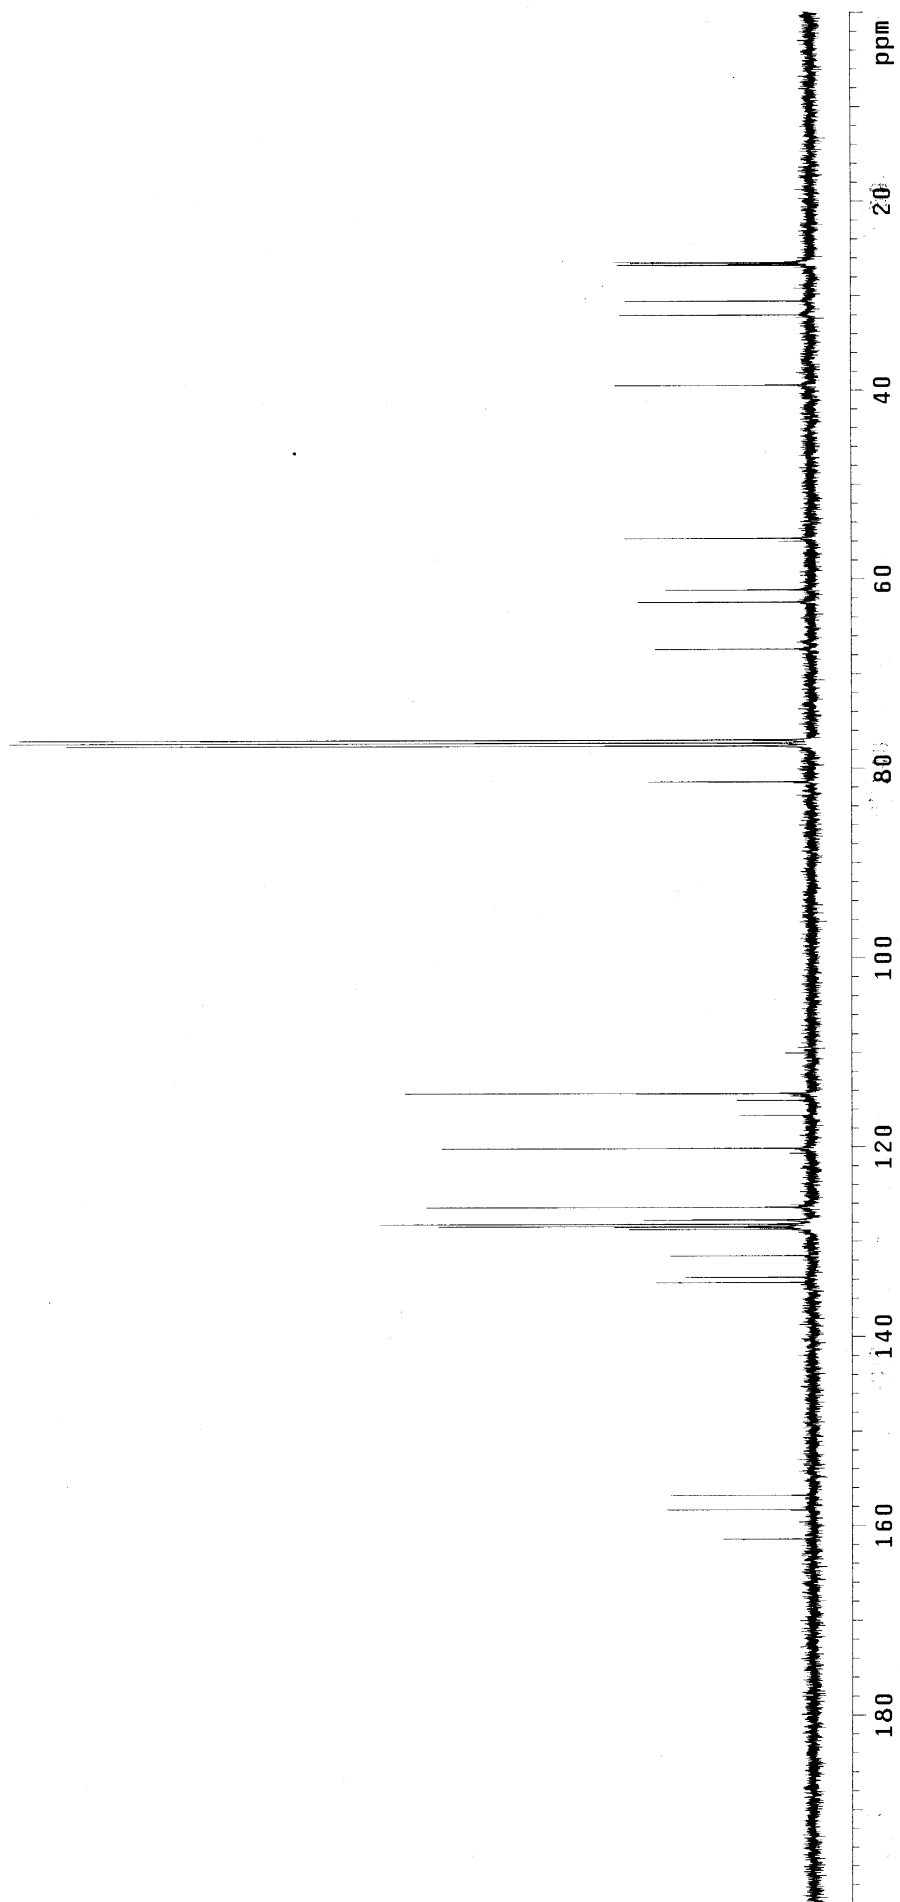

<sup>1</sup>H NMR  
400 MHz, CDCl<sub>3</sub>

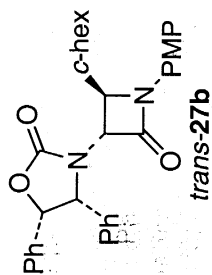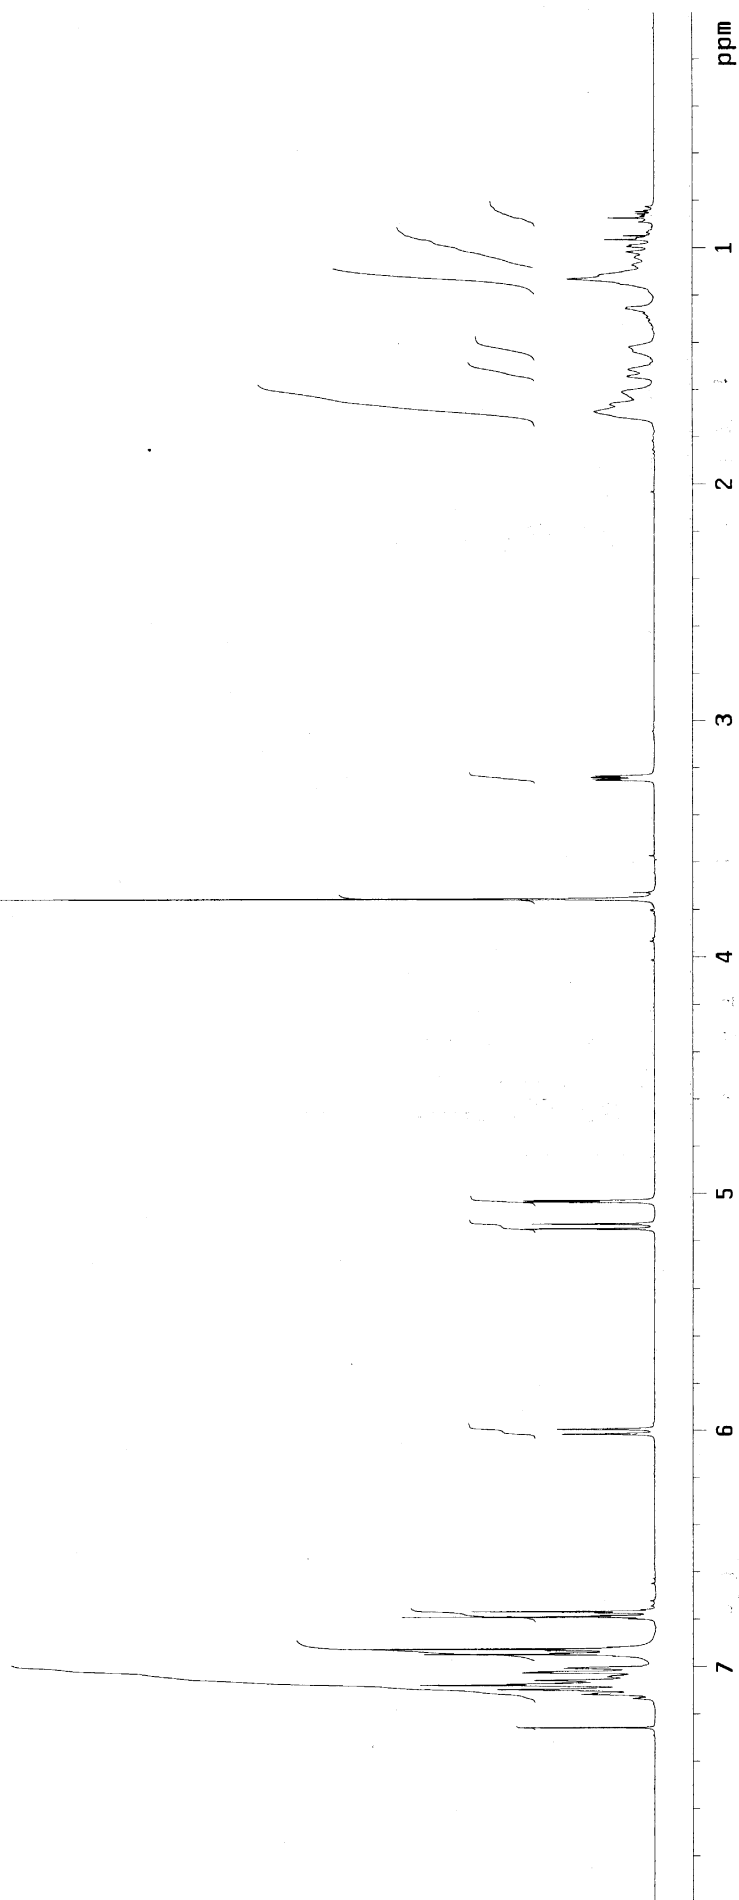

<sup>13</sup>C NMR  
125 MHz, CDCl<sub>3</sub>

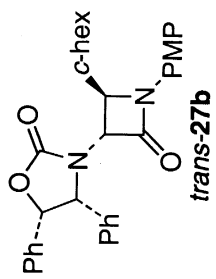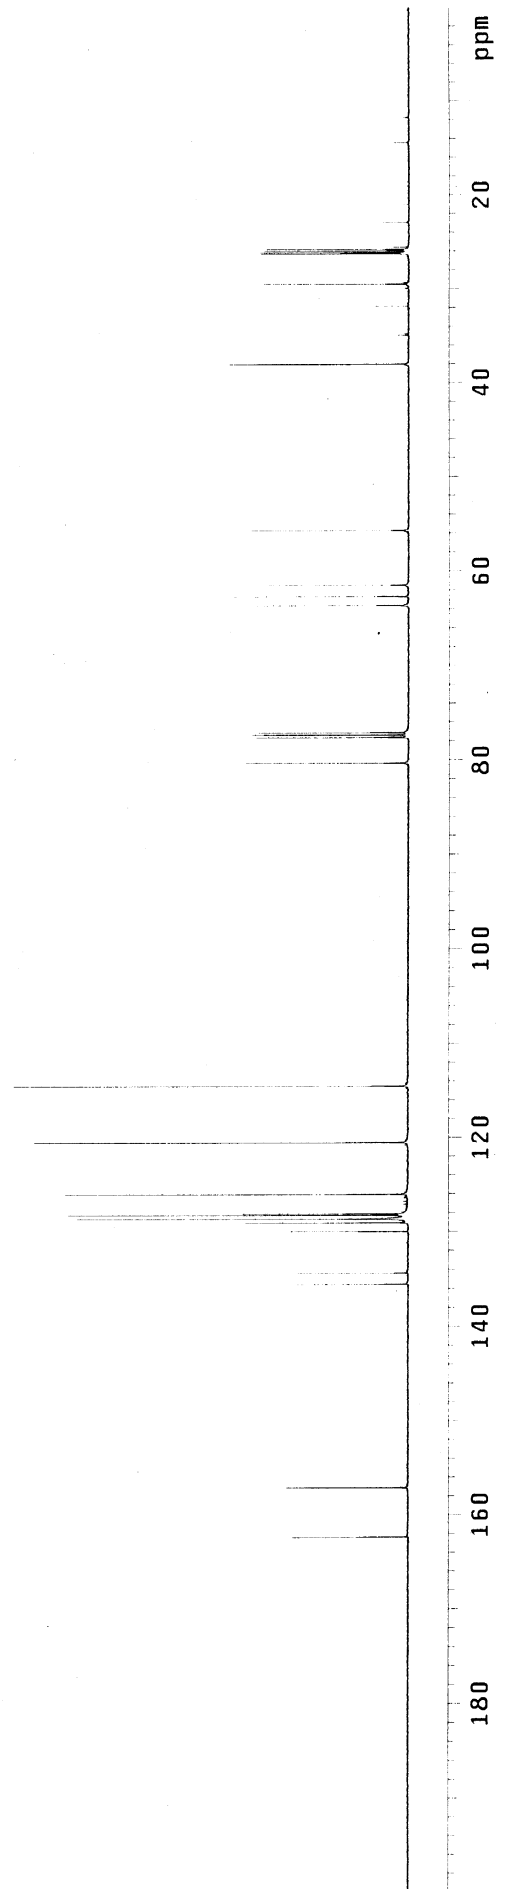

<sup>1</sup>H NMR  
500 MHz, CDCl<sub>3</sub>

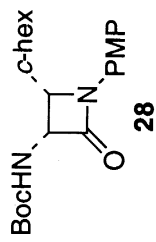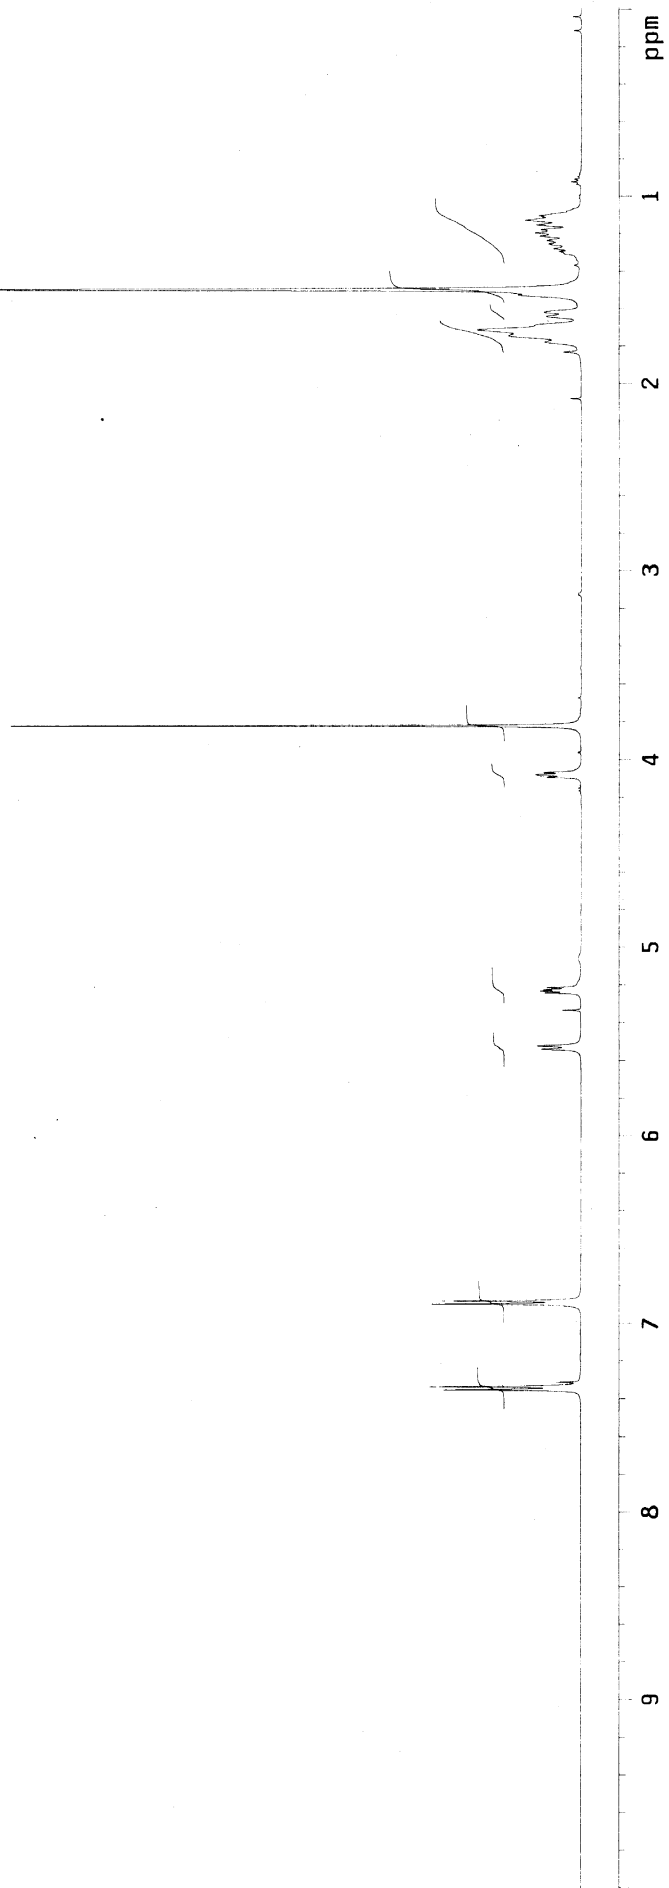

<sup>13</sup>C NMR  
125 MHz, CDCl<sub>3</sub>

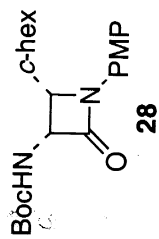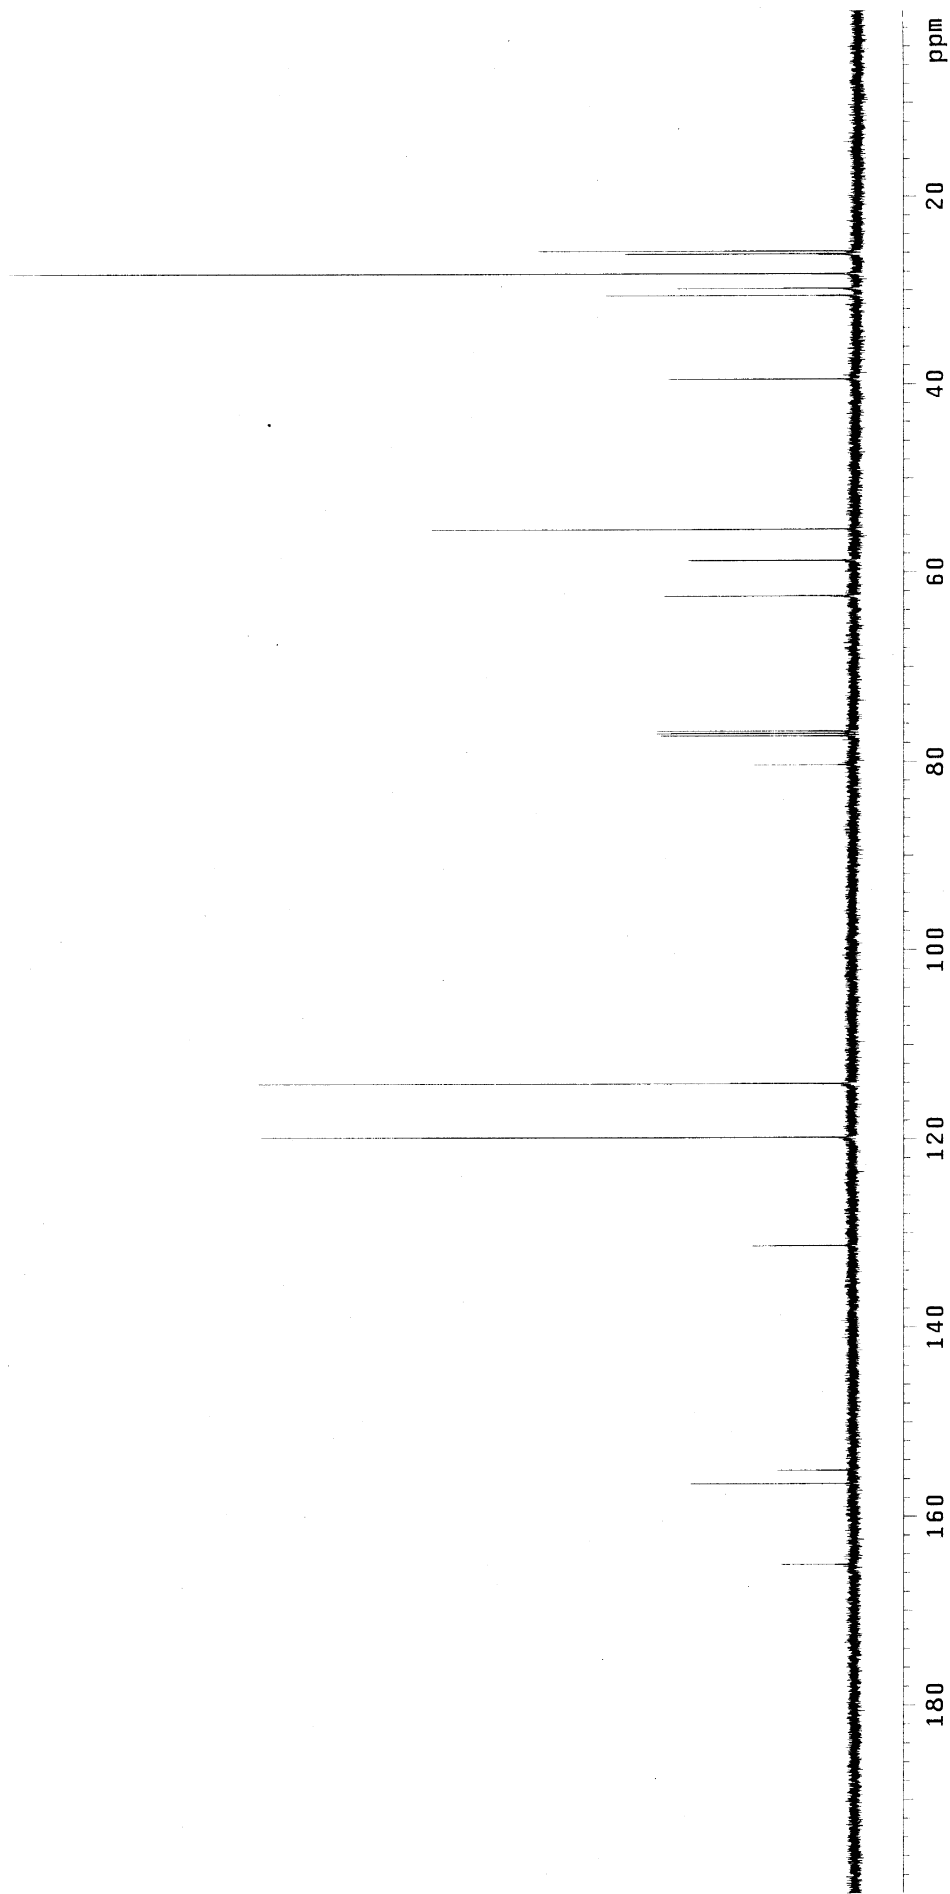

<sup>1</sup>H NMR  
500 MHz, CDCl<sub>3</sub>

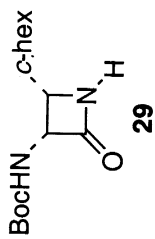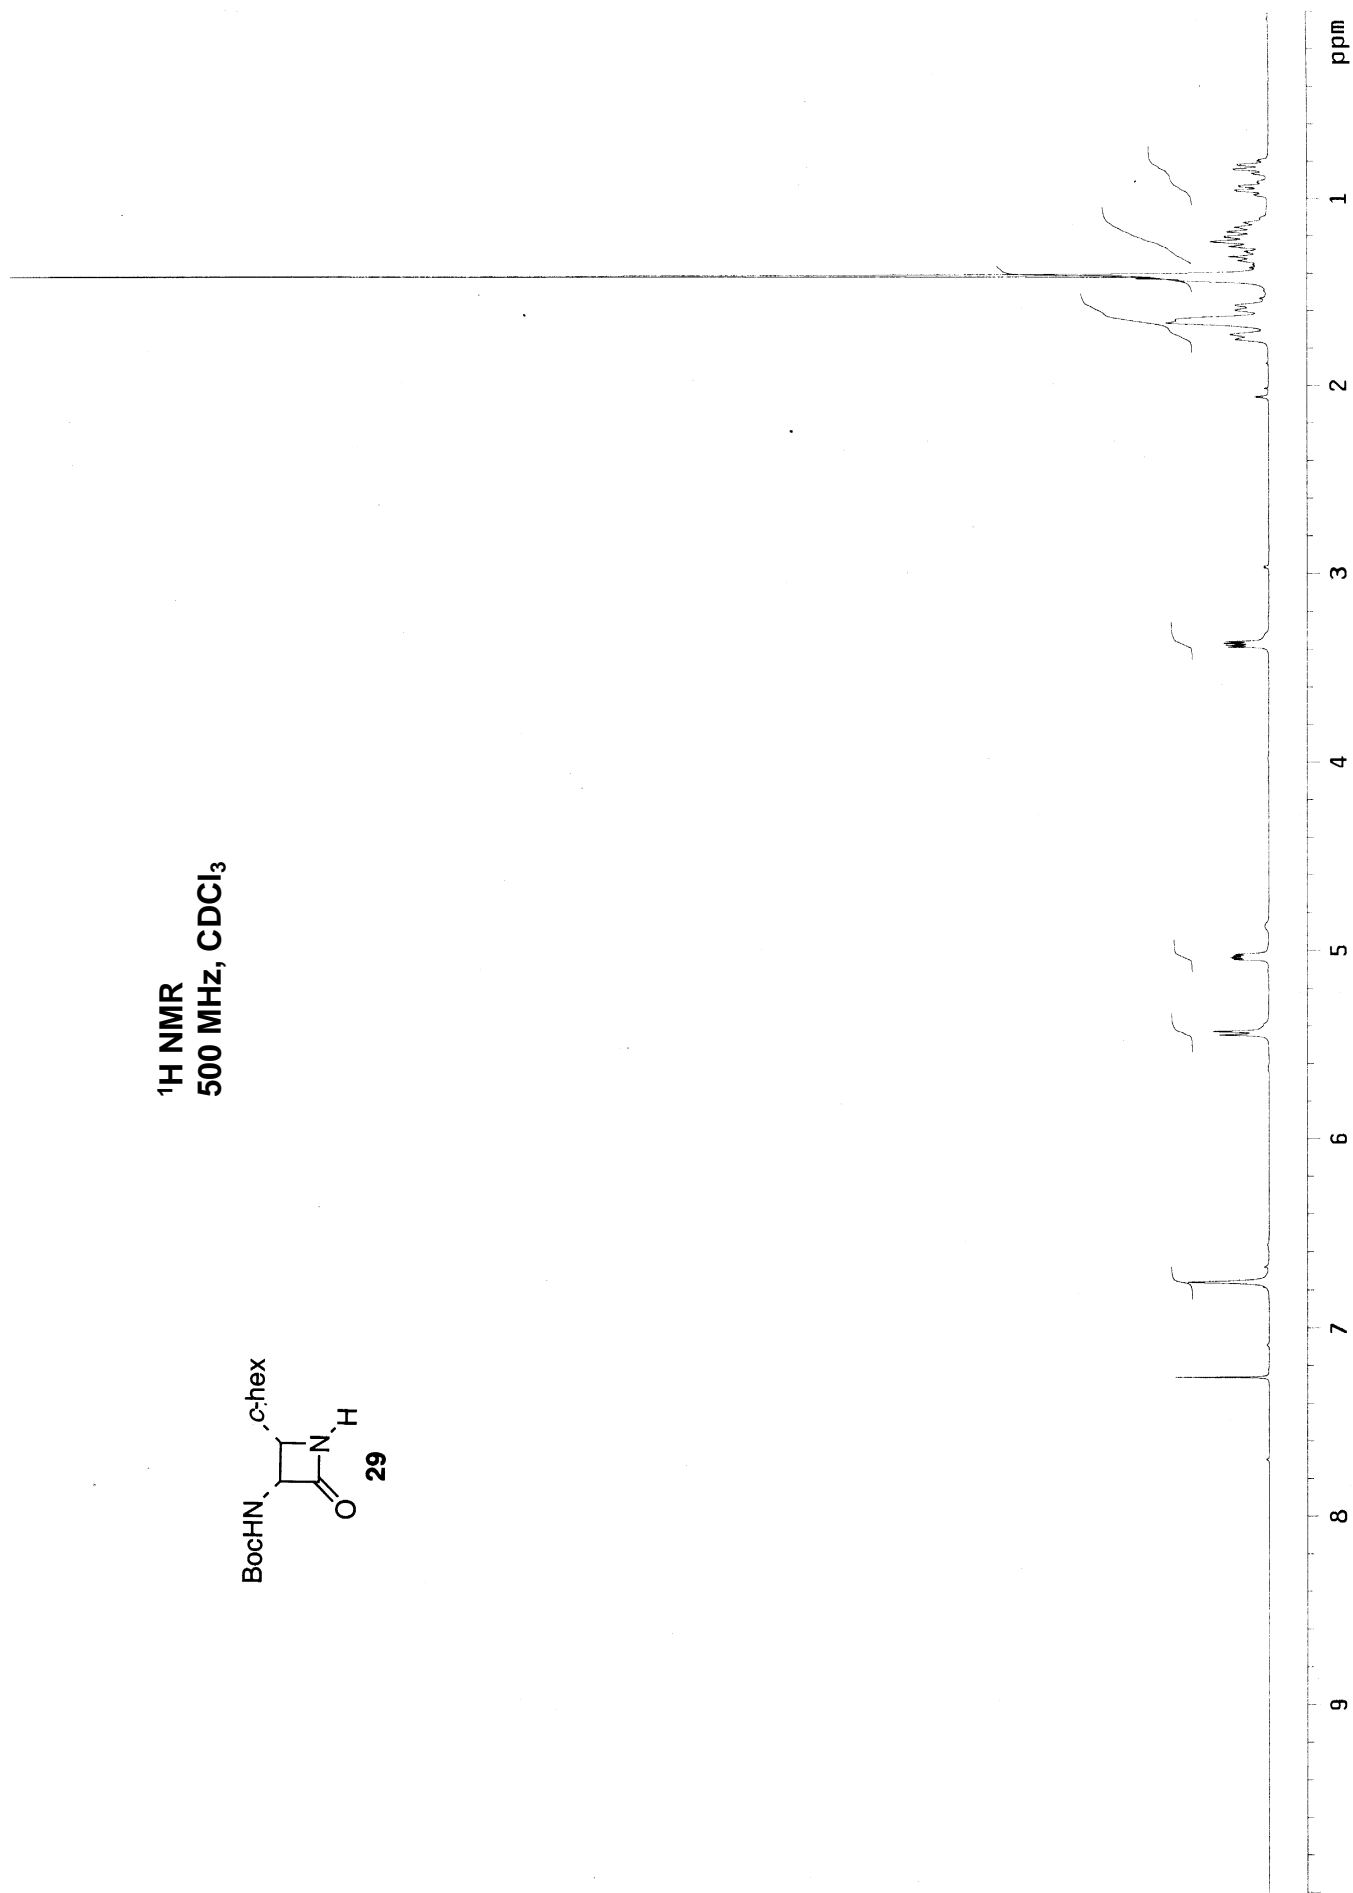



<sup>13</sup>C NMR  
125 MHz, CDCl<sub>3</sub>

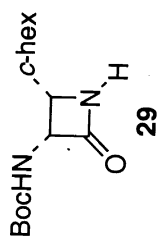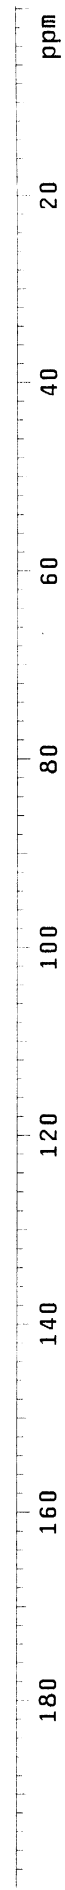

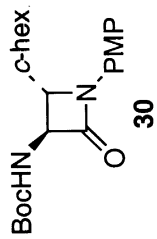

<sup>1</sup>H NMR  
500 MHz, CDCl<sub>3</sub>

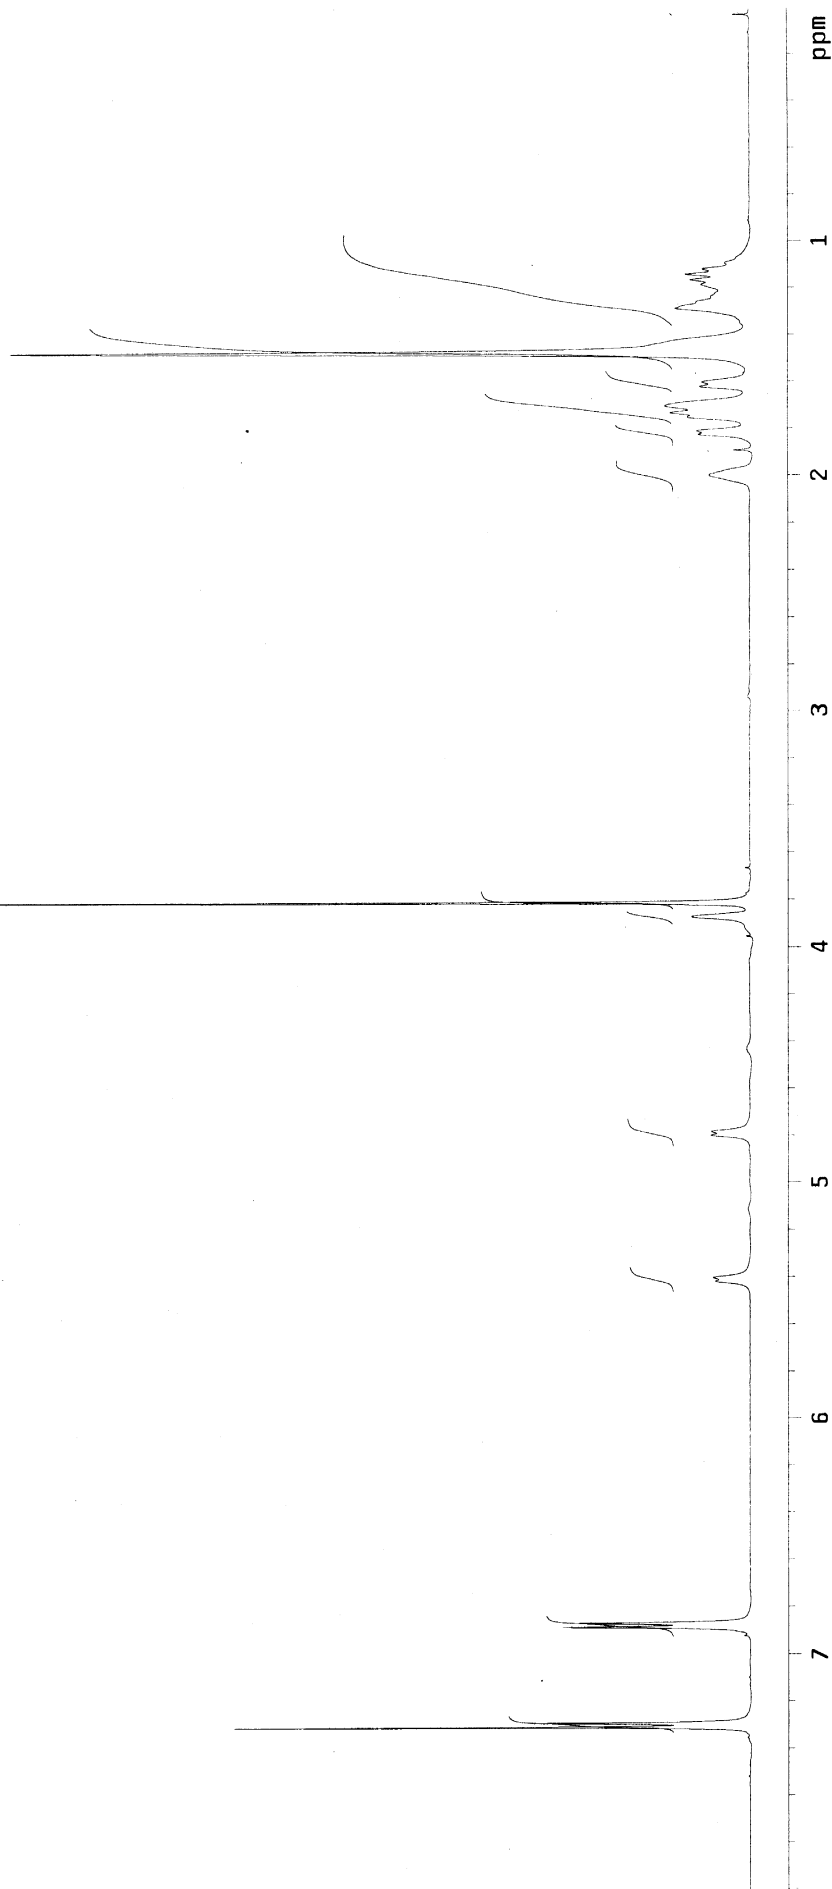

<sup>13</sup>C NMR  
125 MHz, CDCl<sub>3</sub>

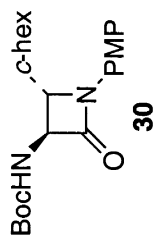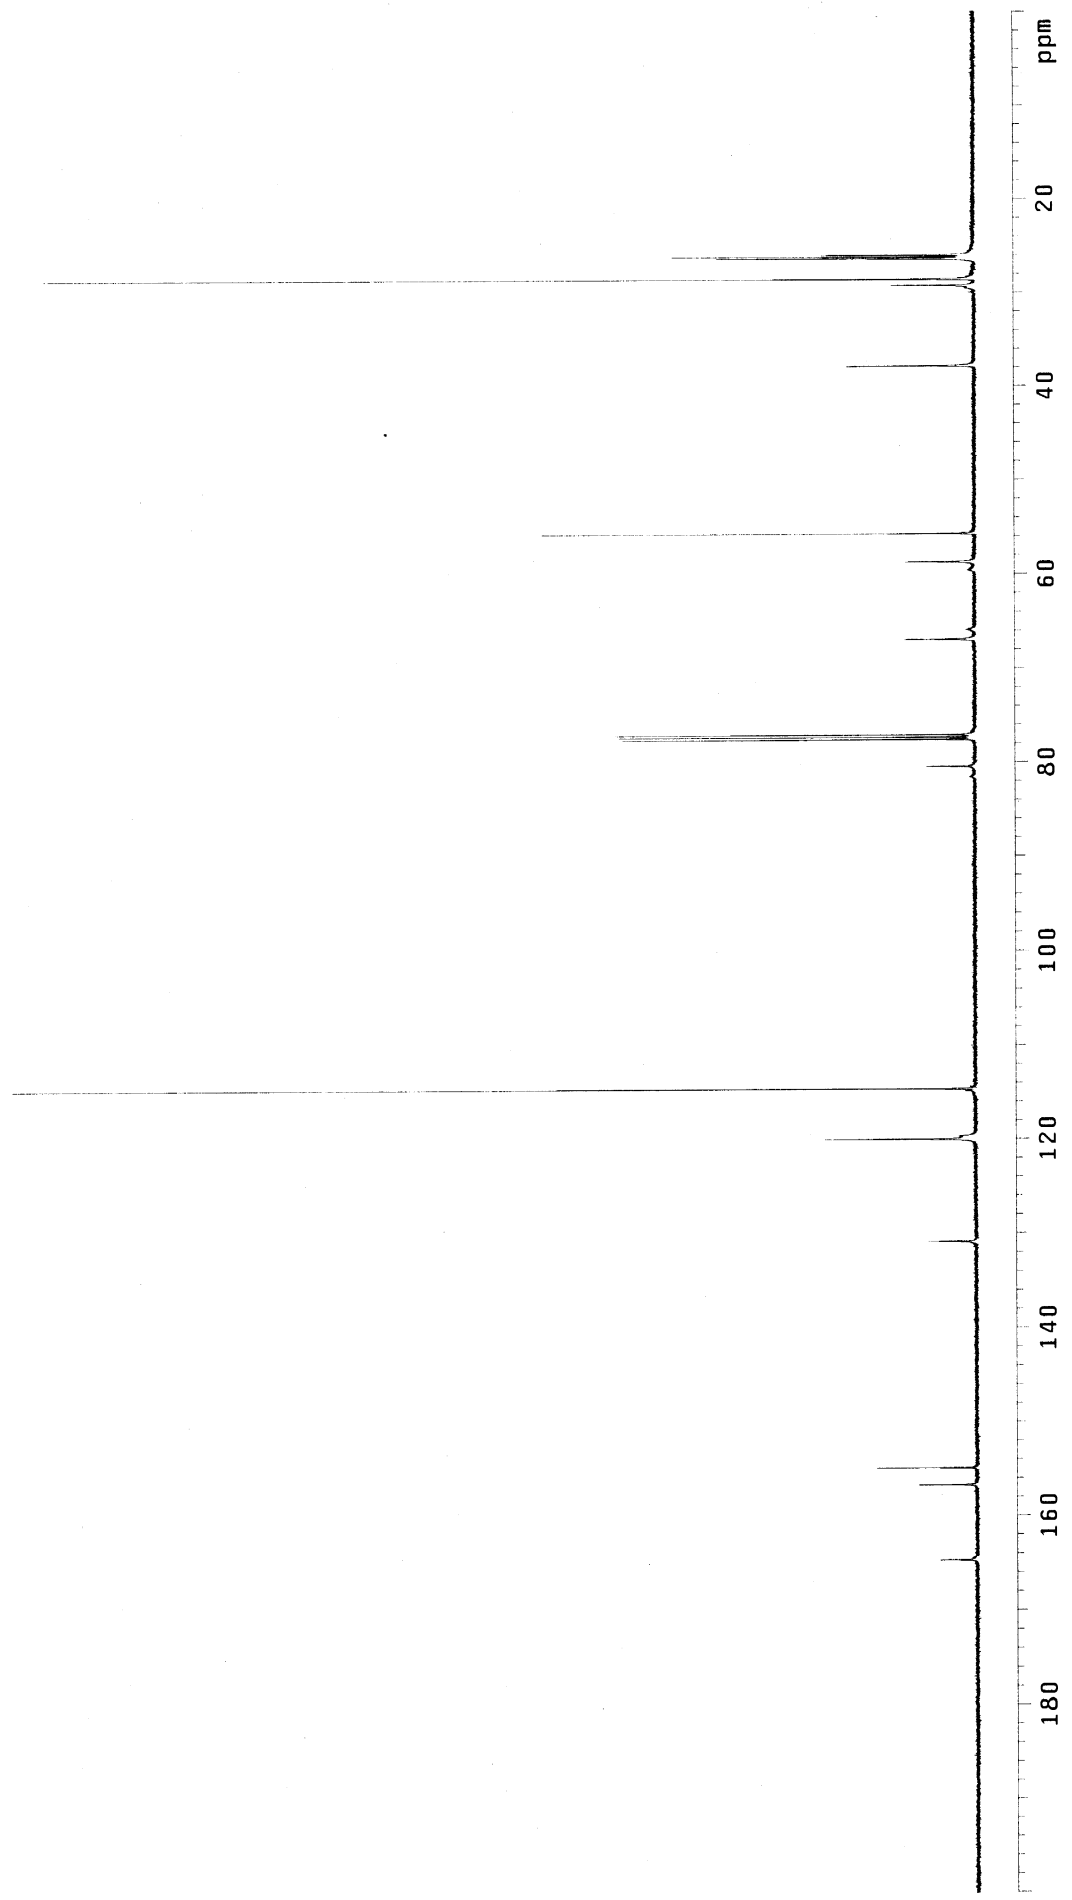

**<sup>1</sup>H NMR**  
**500 MHz, CDCl<sub>3</sub>**

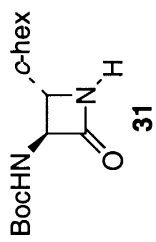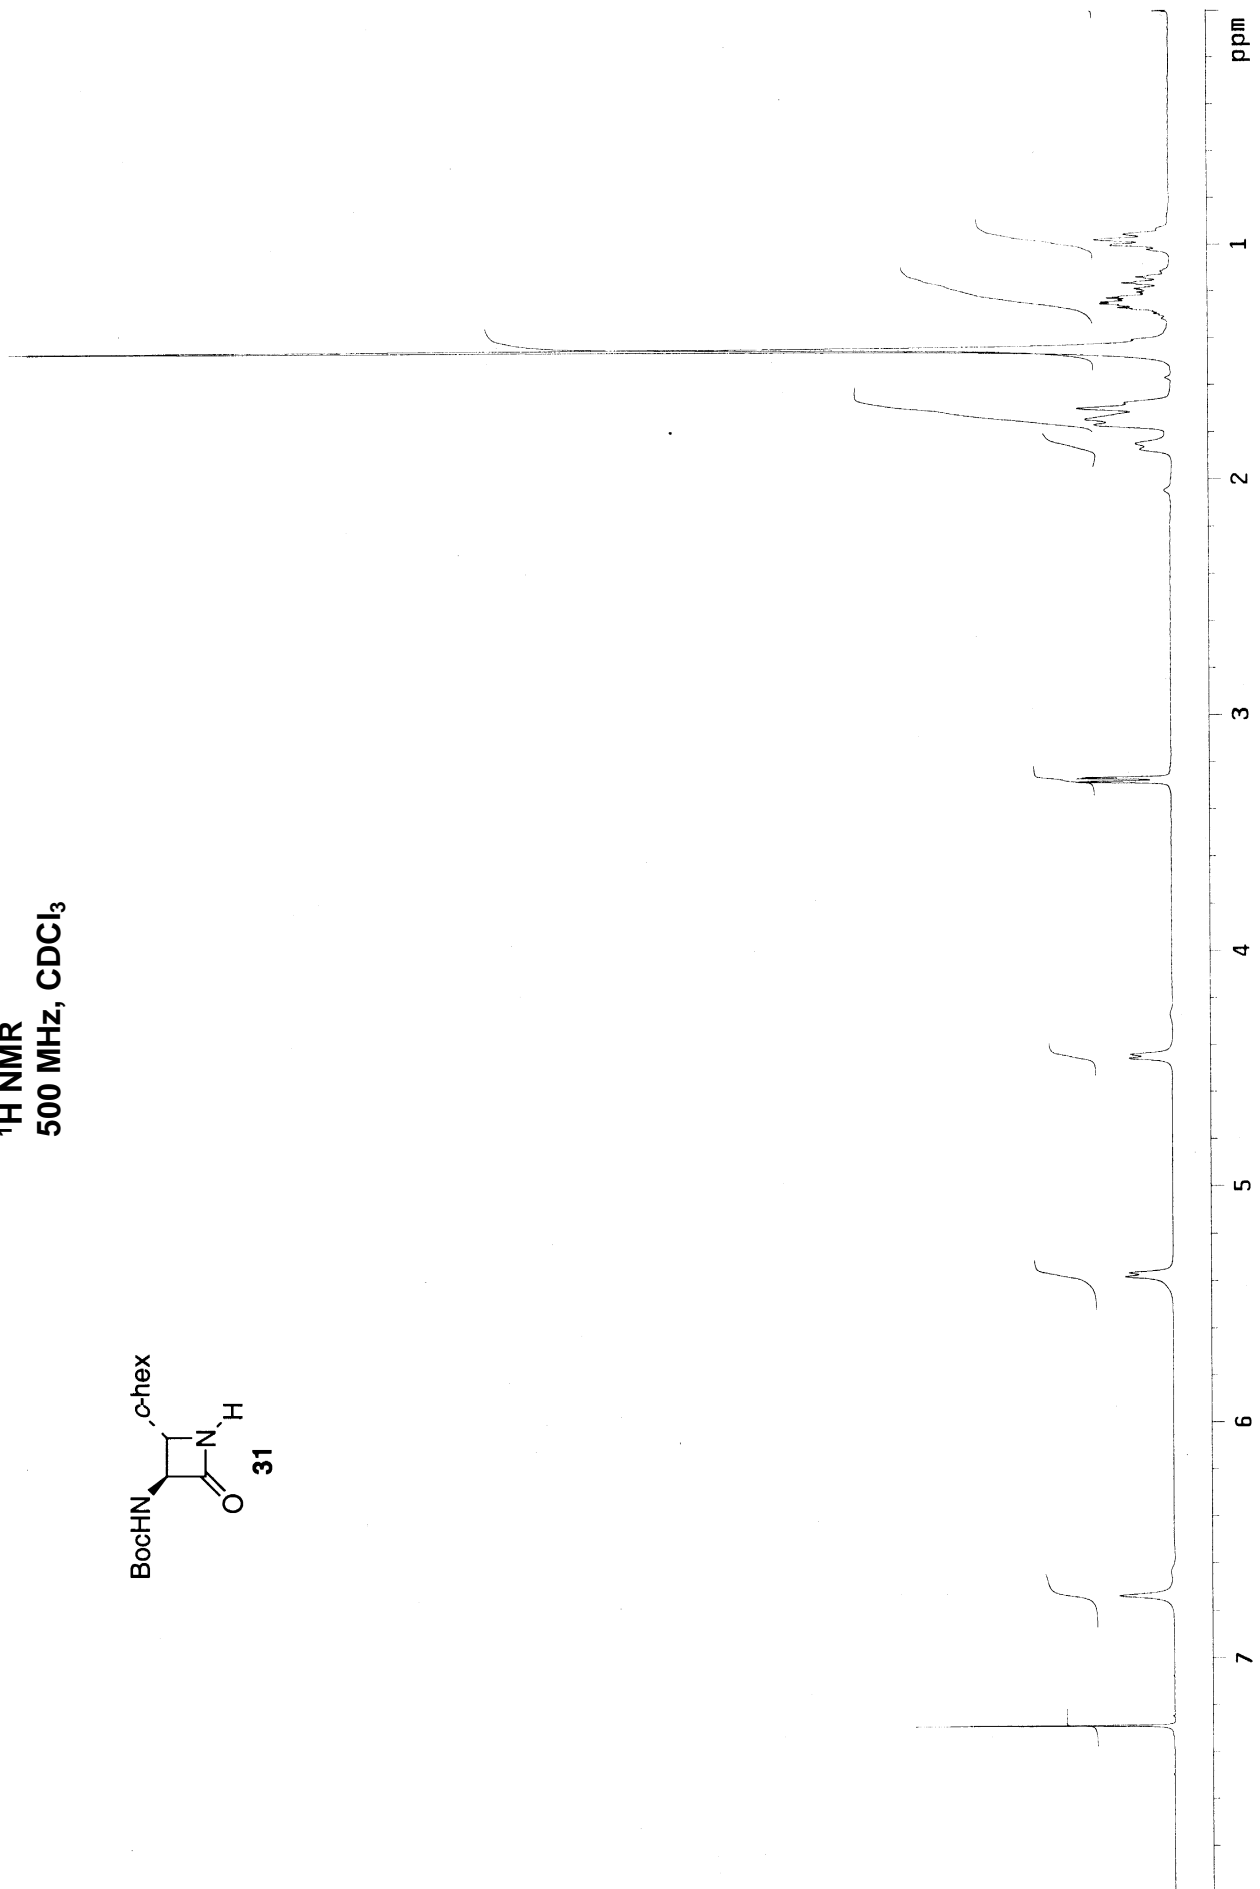



# Cosy and NOE Experiment of Compound

## *cis*-27a

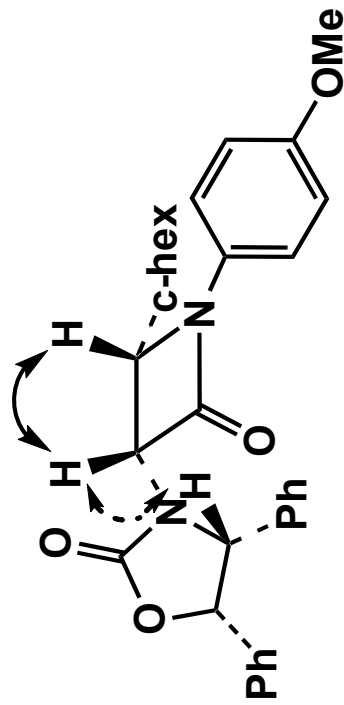

nOe of *cis*-27a

COSY  
500 MHz, CDCl<sub>3</sub>

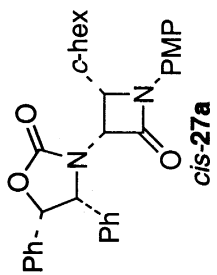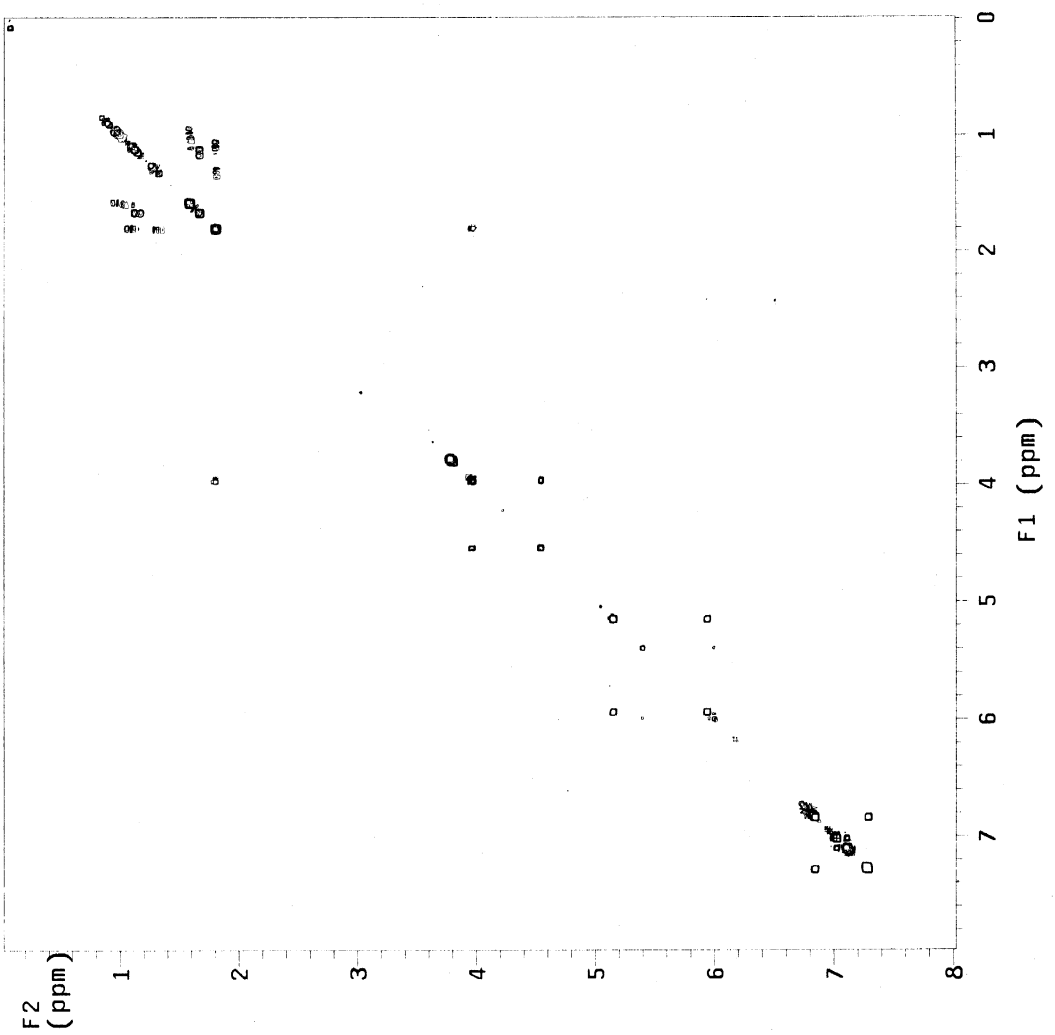

NOE  
500 MHz, CDCl<sub>3</sub>

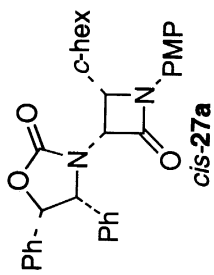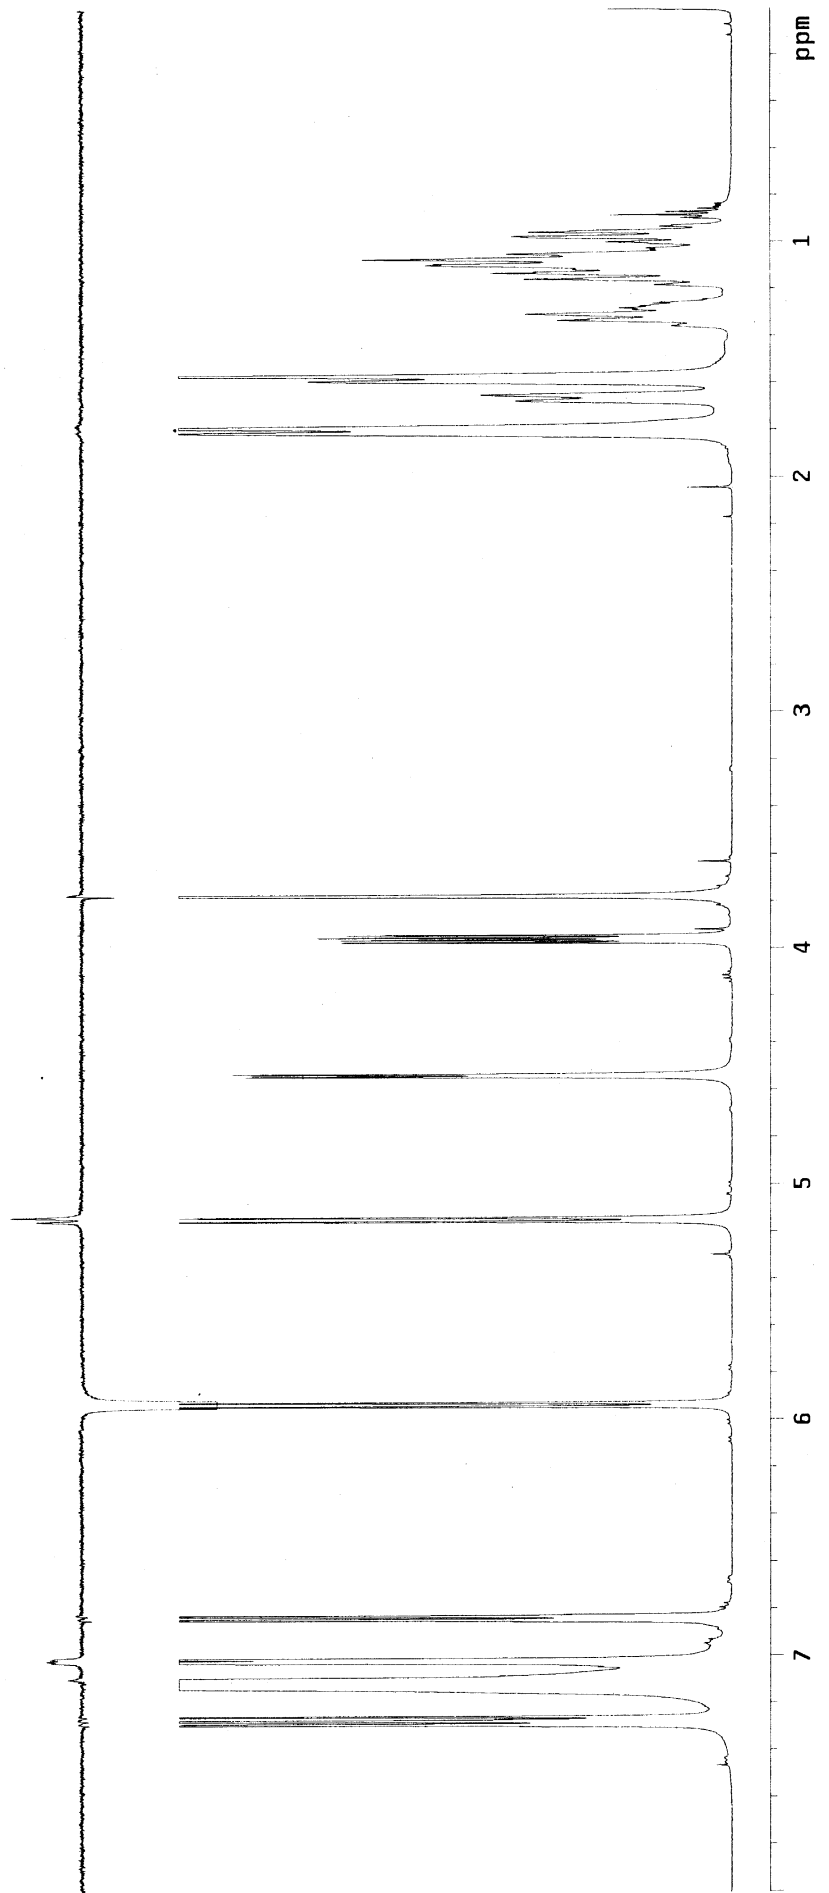



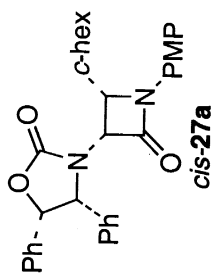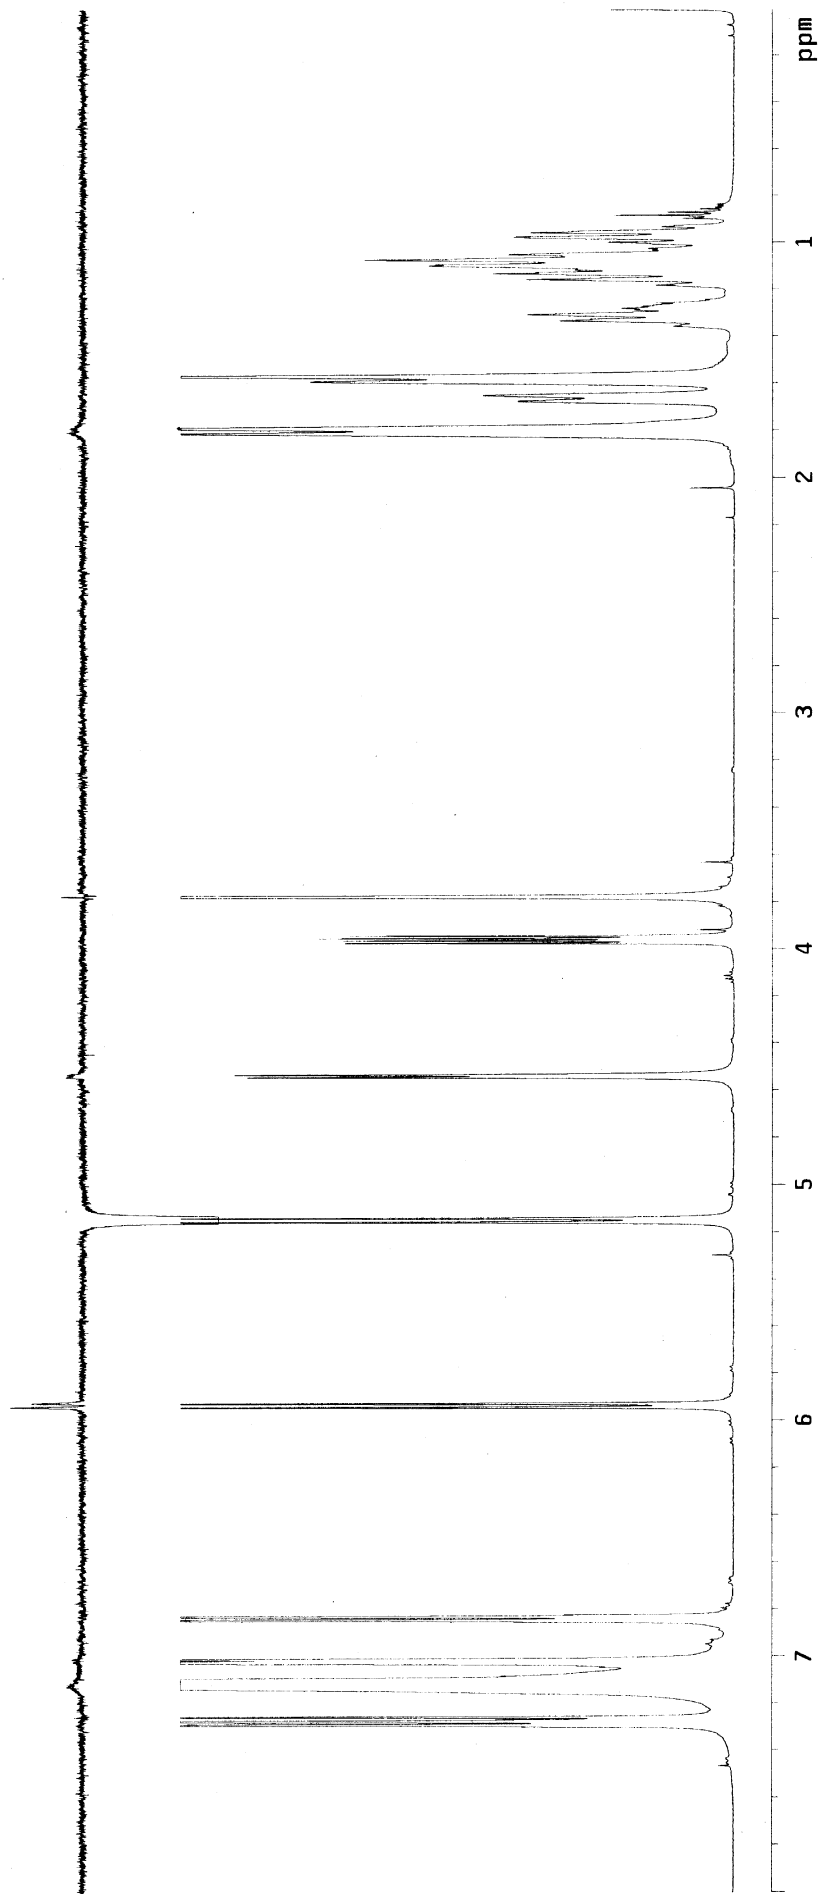

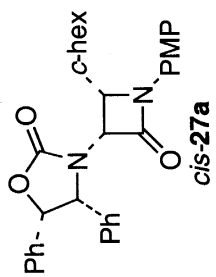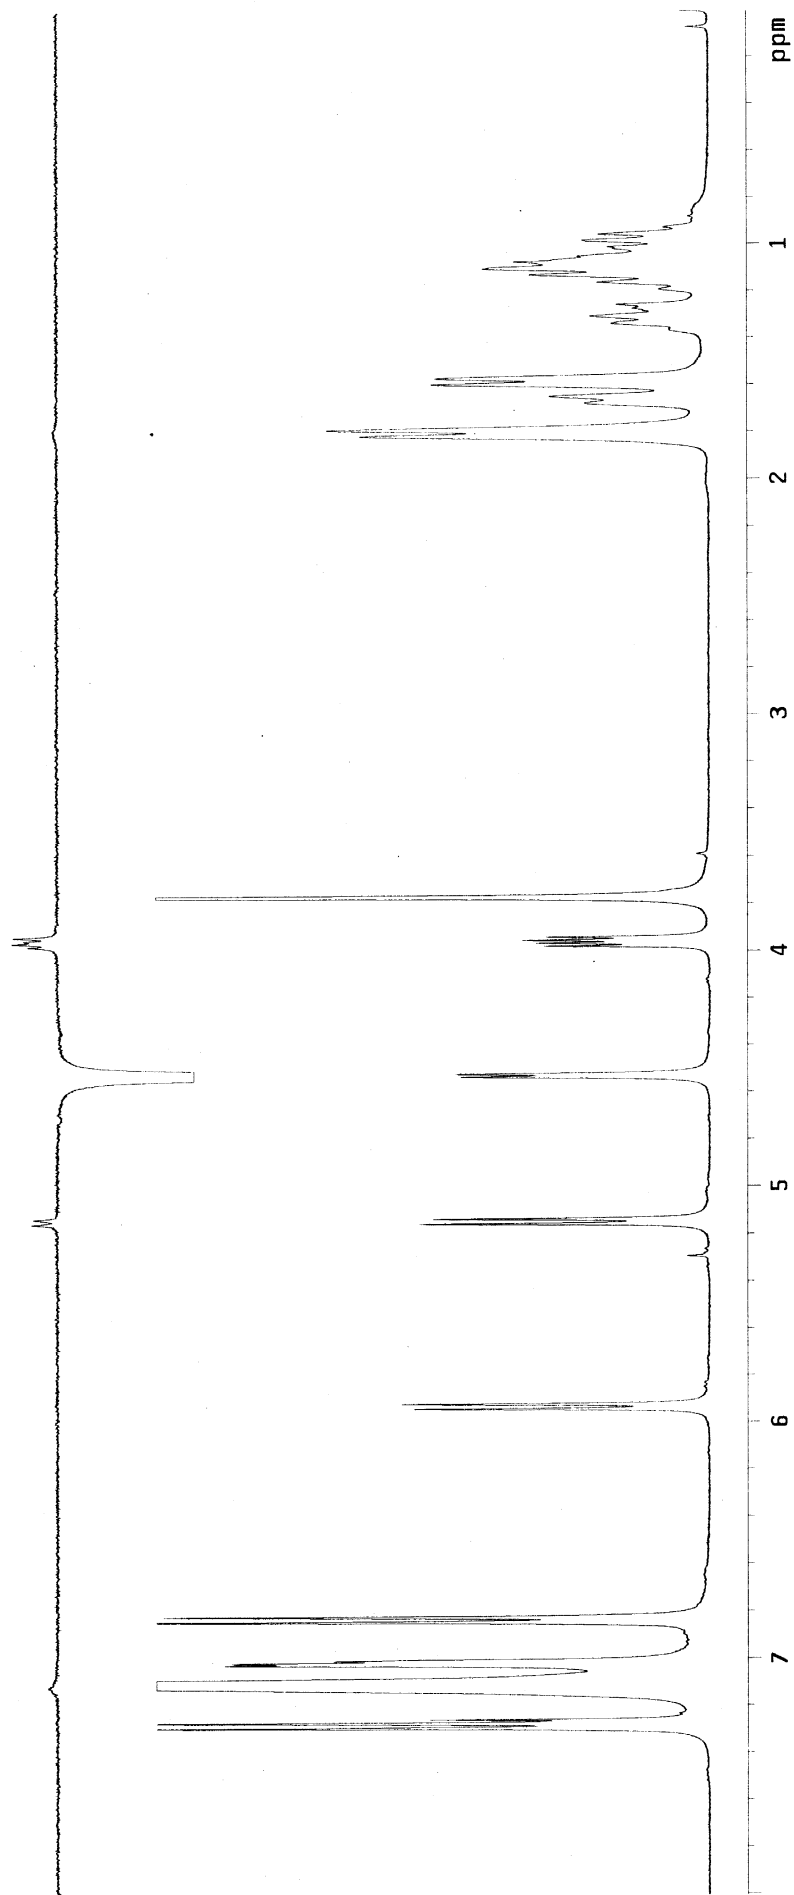



# Cosy and NOE Experiment of Compound

## *trans*-27a

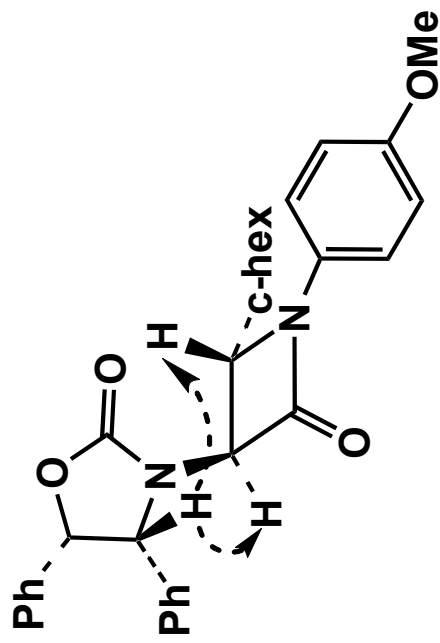

nOe of *trans*-27a

COSY  
400 MHz, CDCl<sub>3</sub>

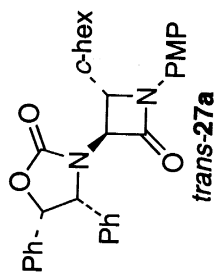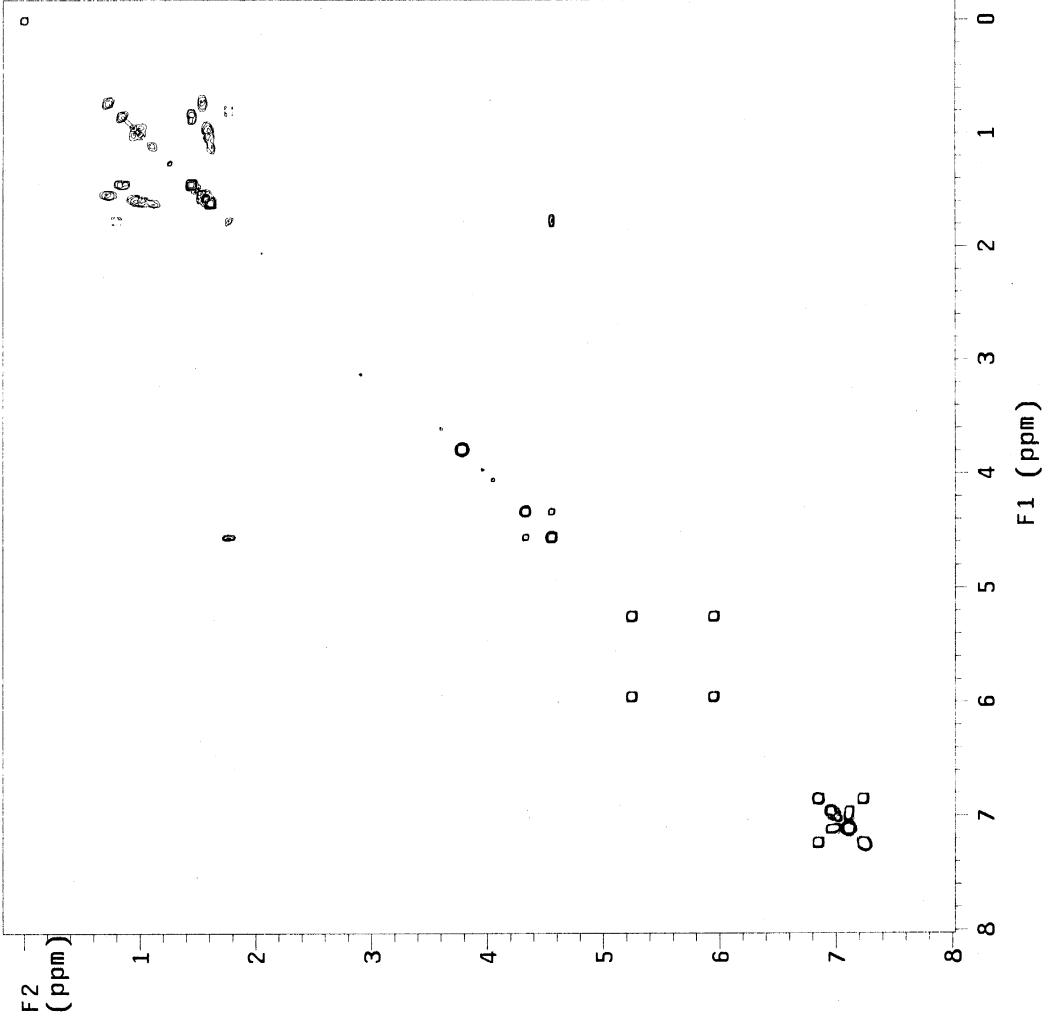

NOE  
400 MHz, CDCl<sub>3</sub>

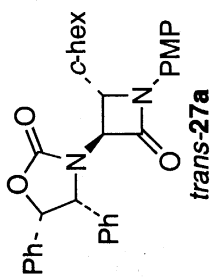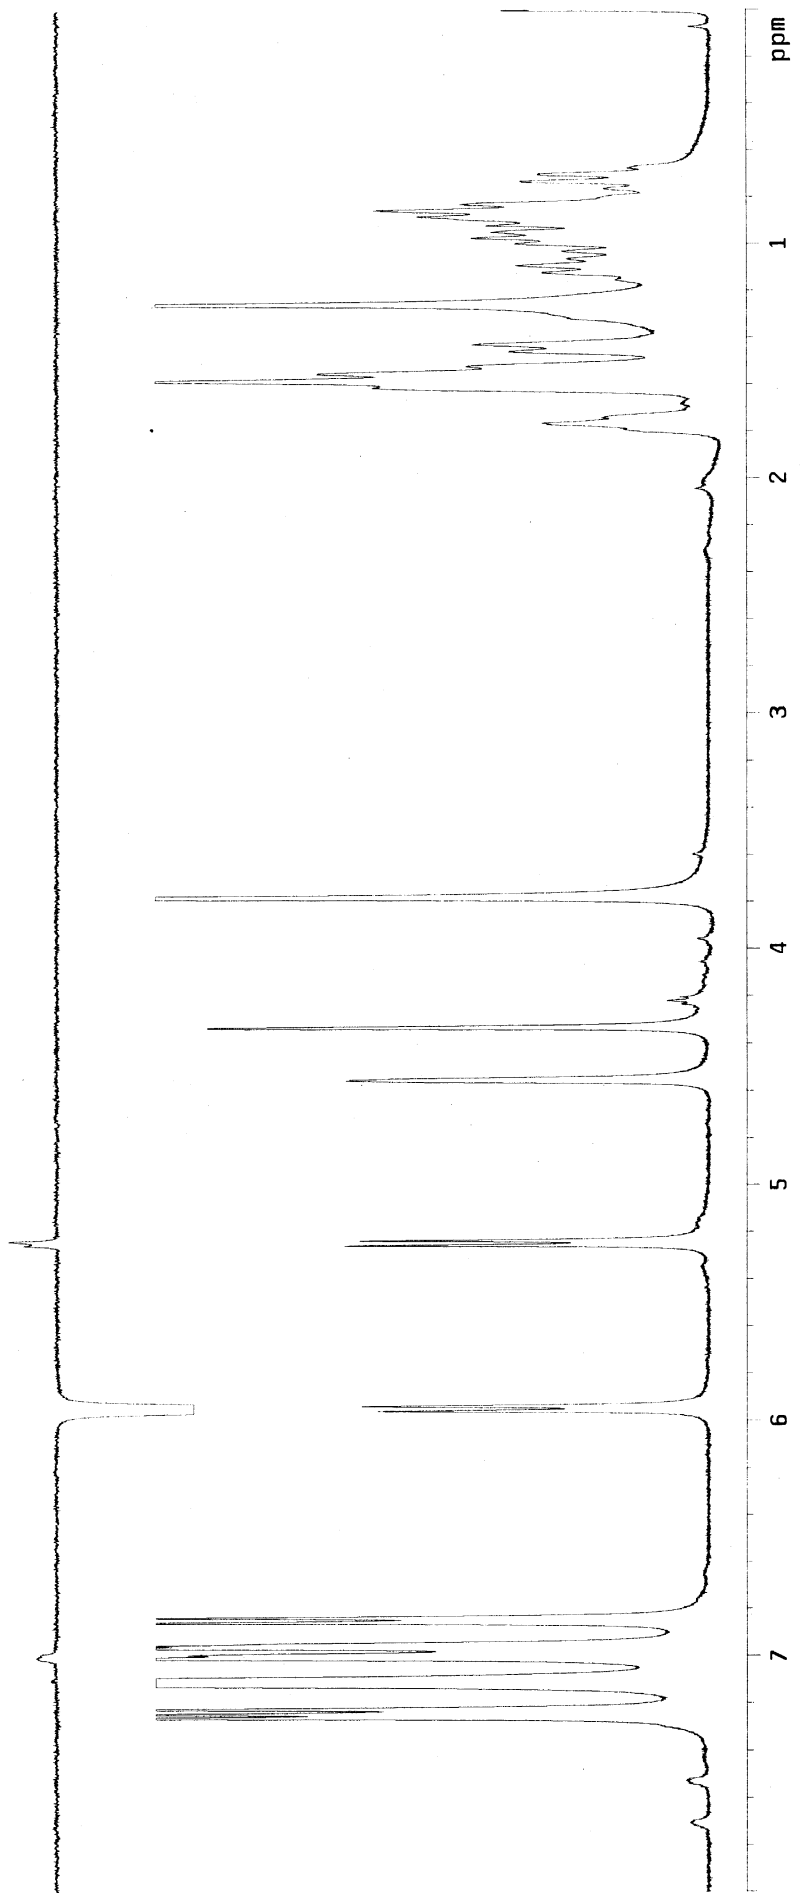

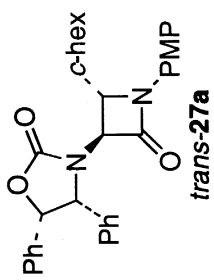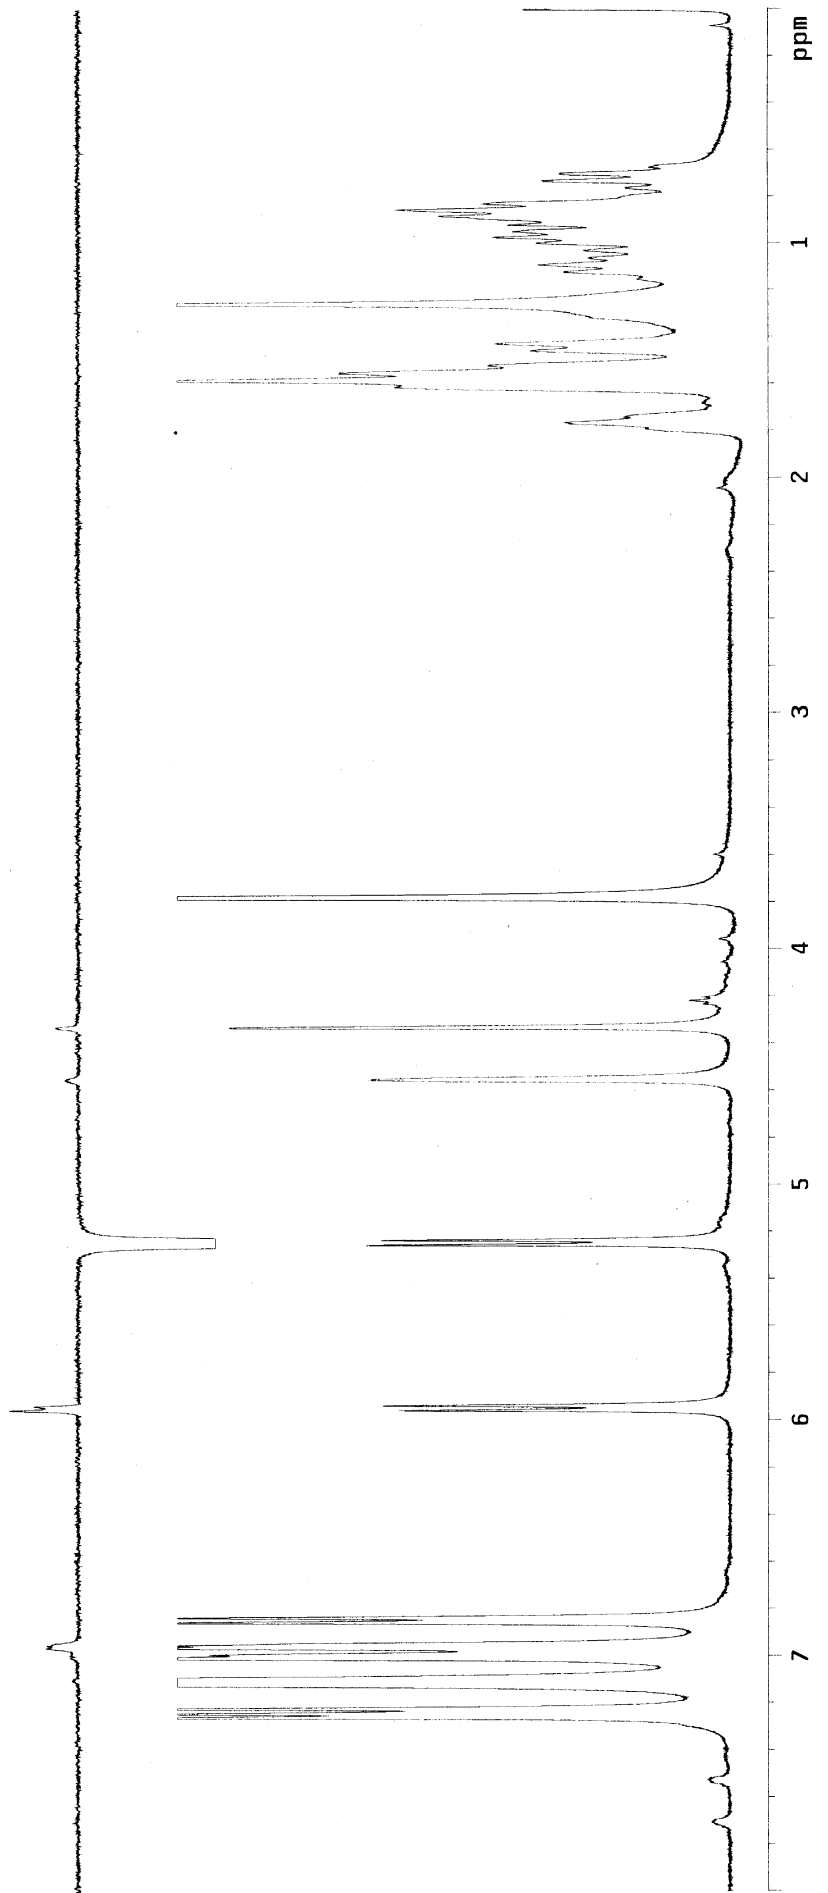

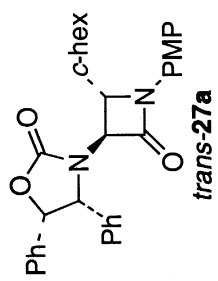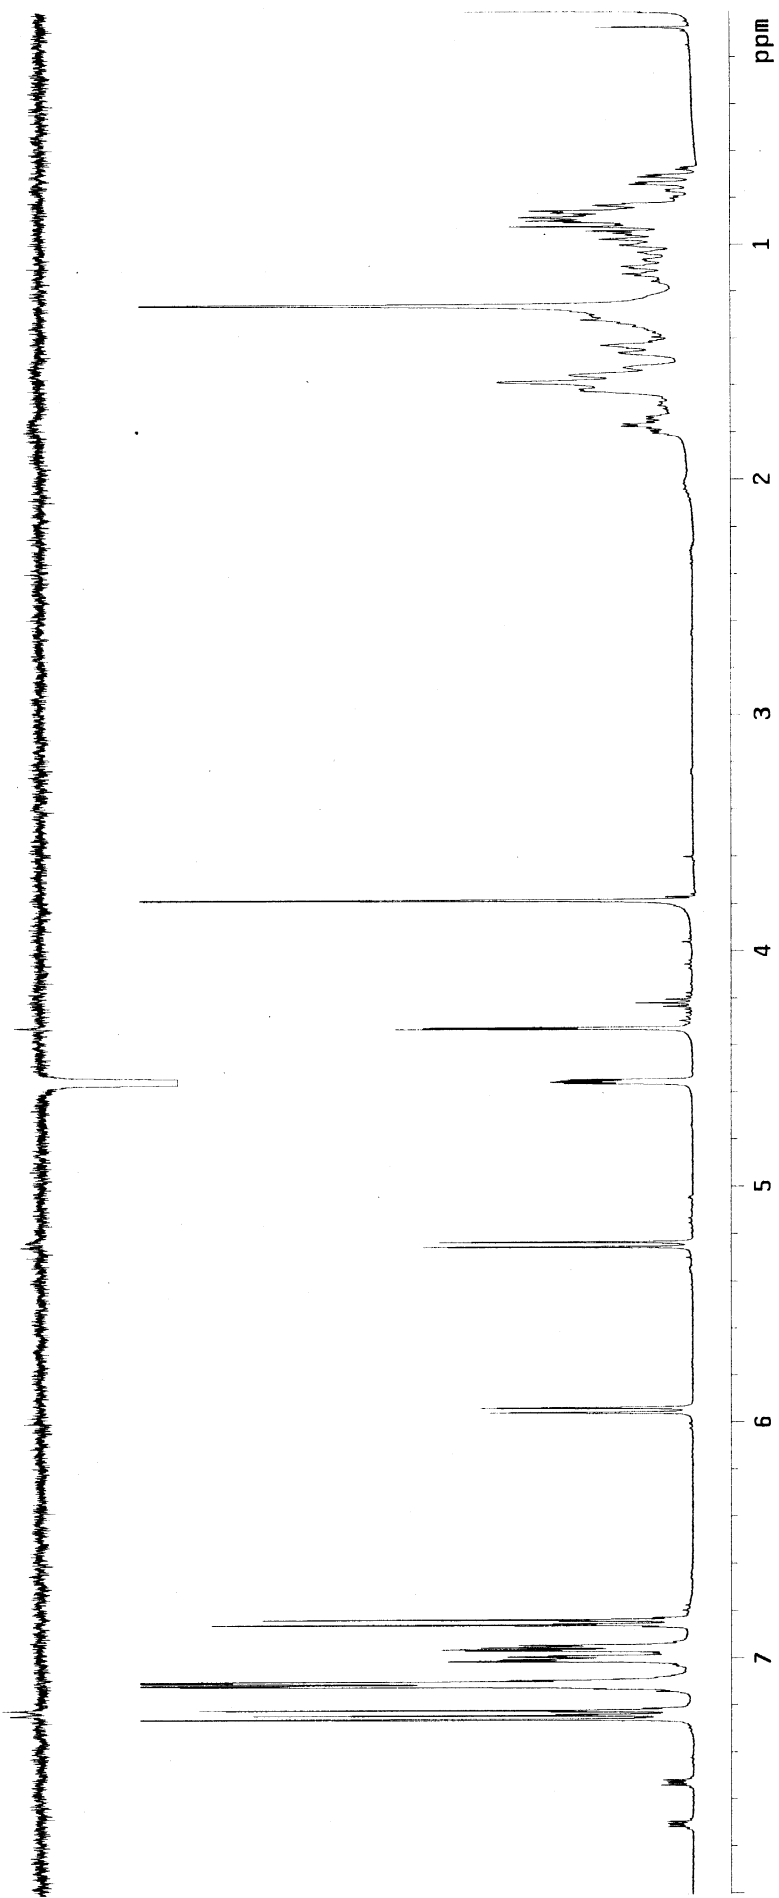



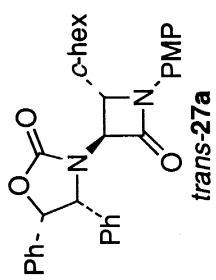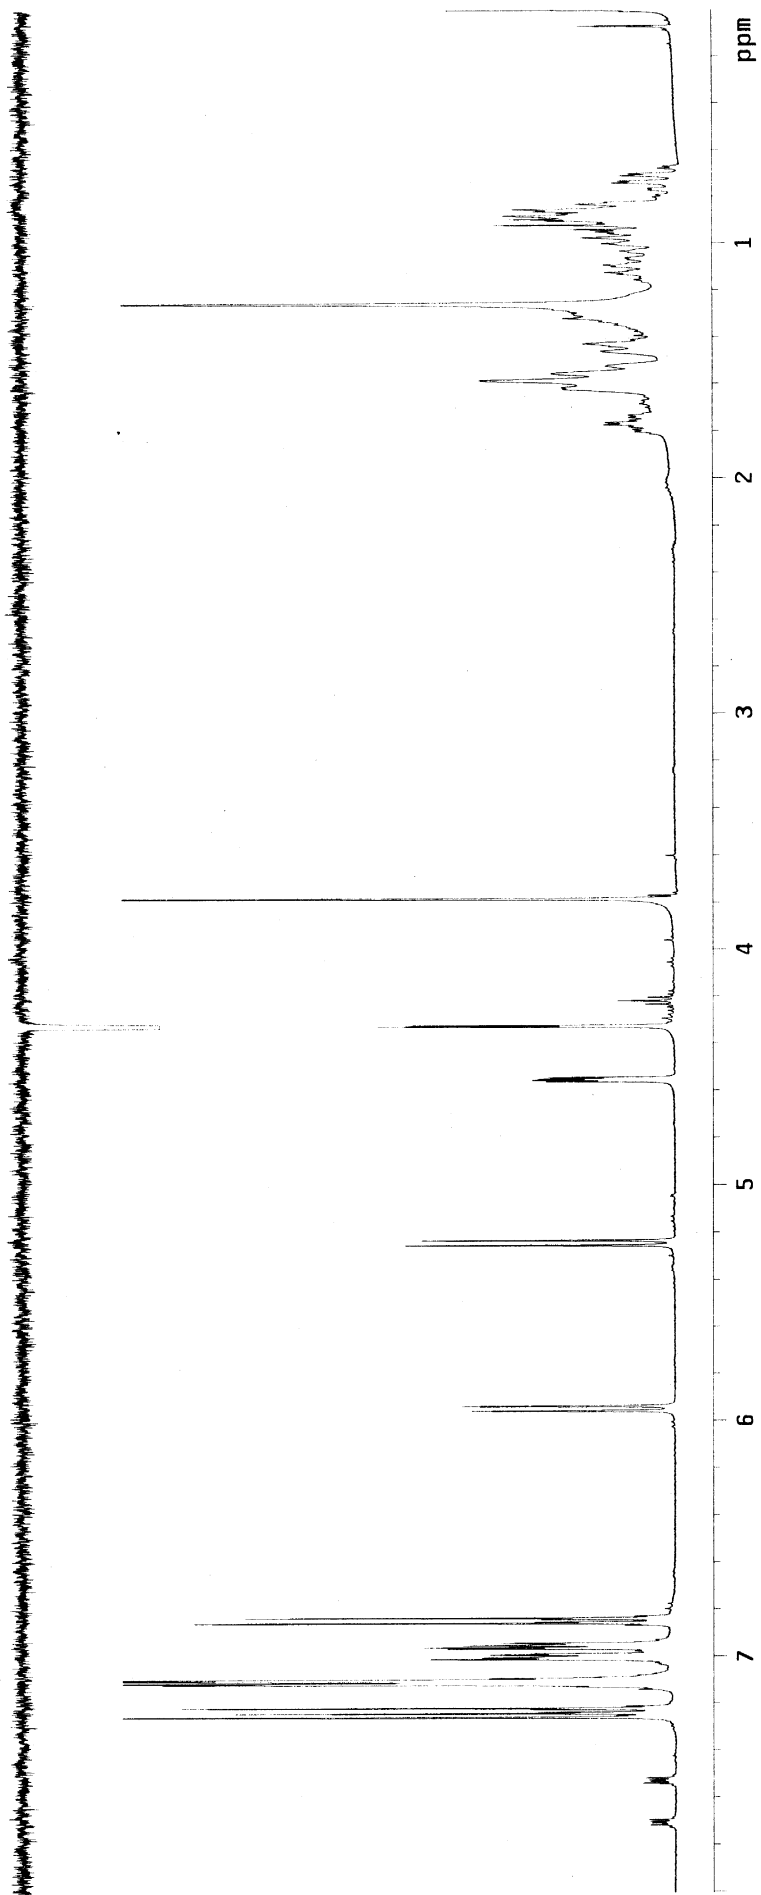

# Cosy and NOE Experiment of Compound

*cis*-27b

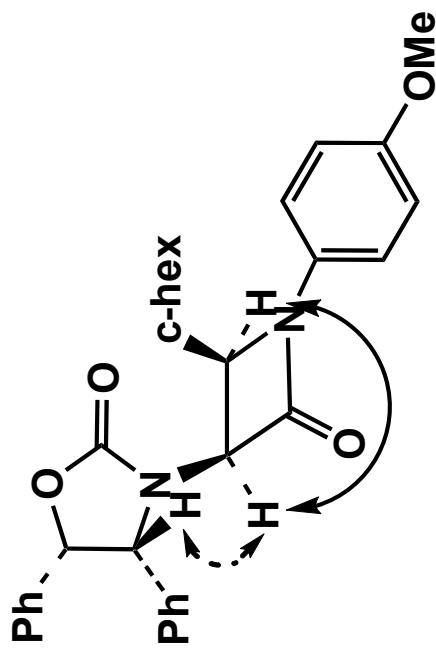

nOe of *cis*-27b

COSY  
400 MHz, CDCl<sub>3</sub>

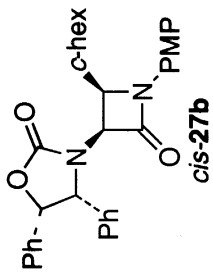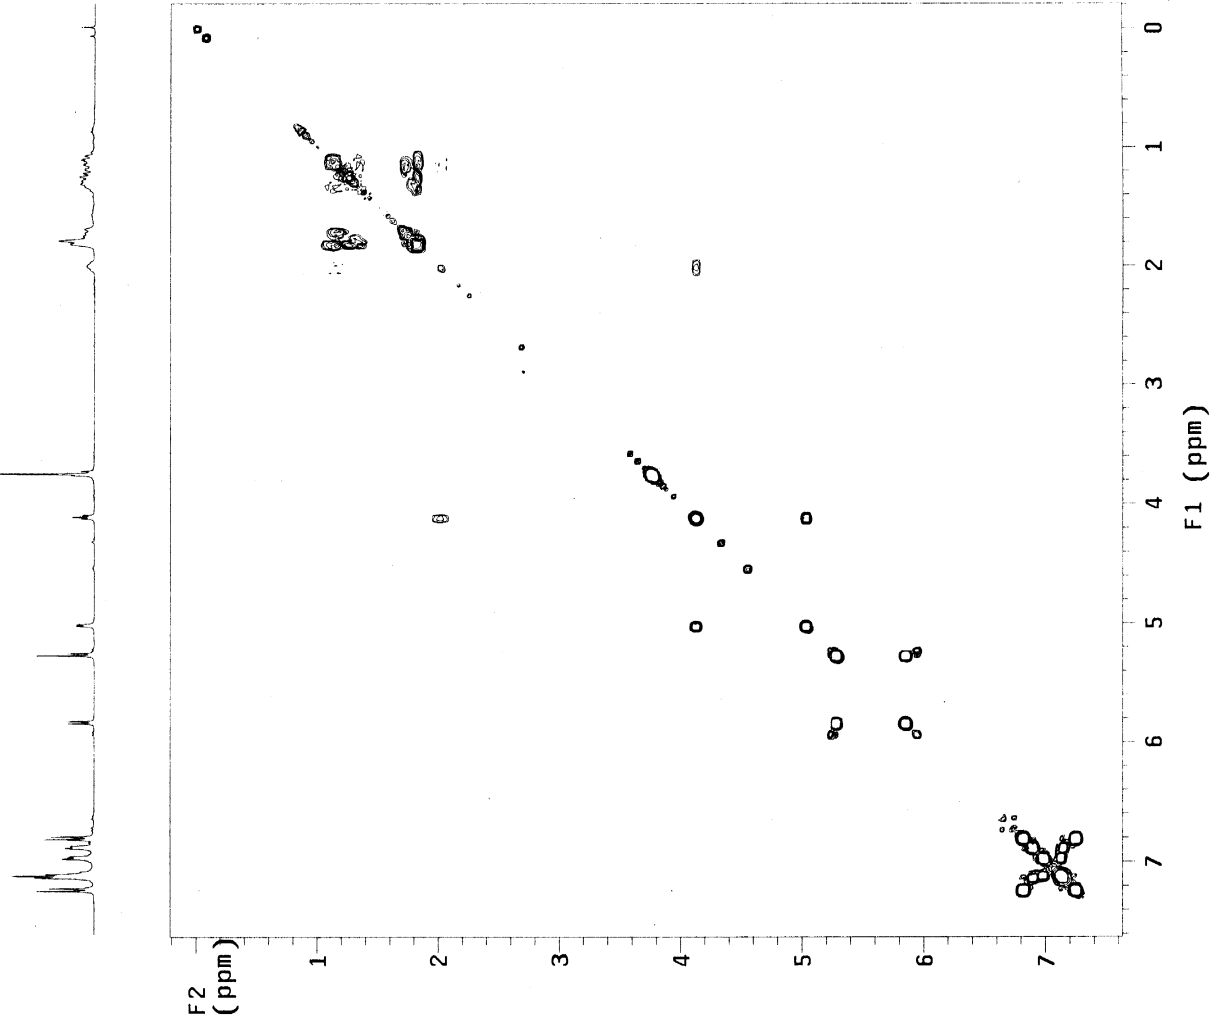

NOE  
400 MHz, CDCl<sub>3</sub>

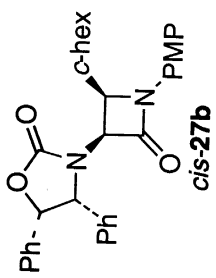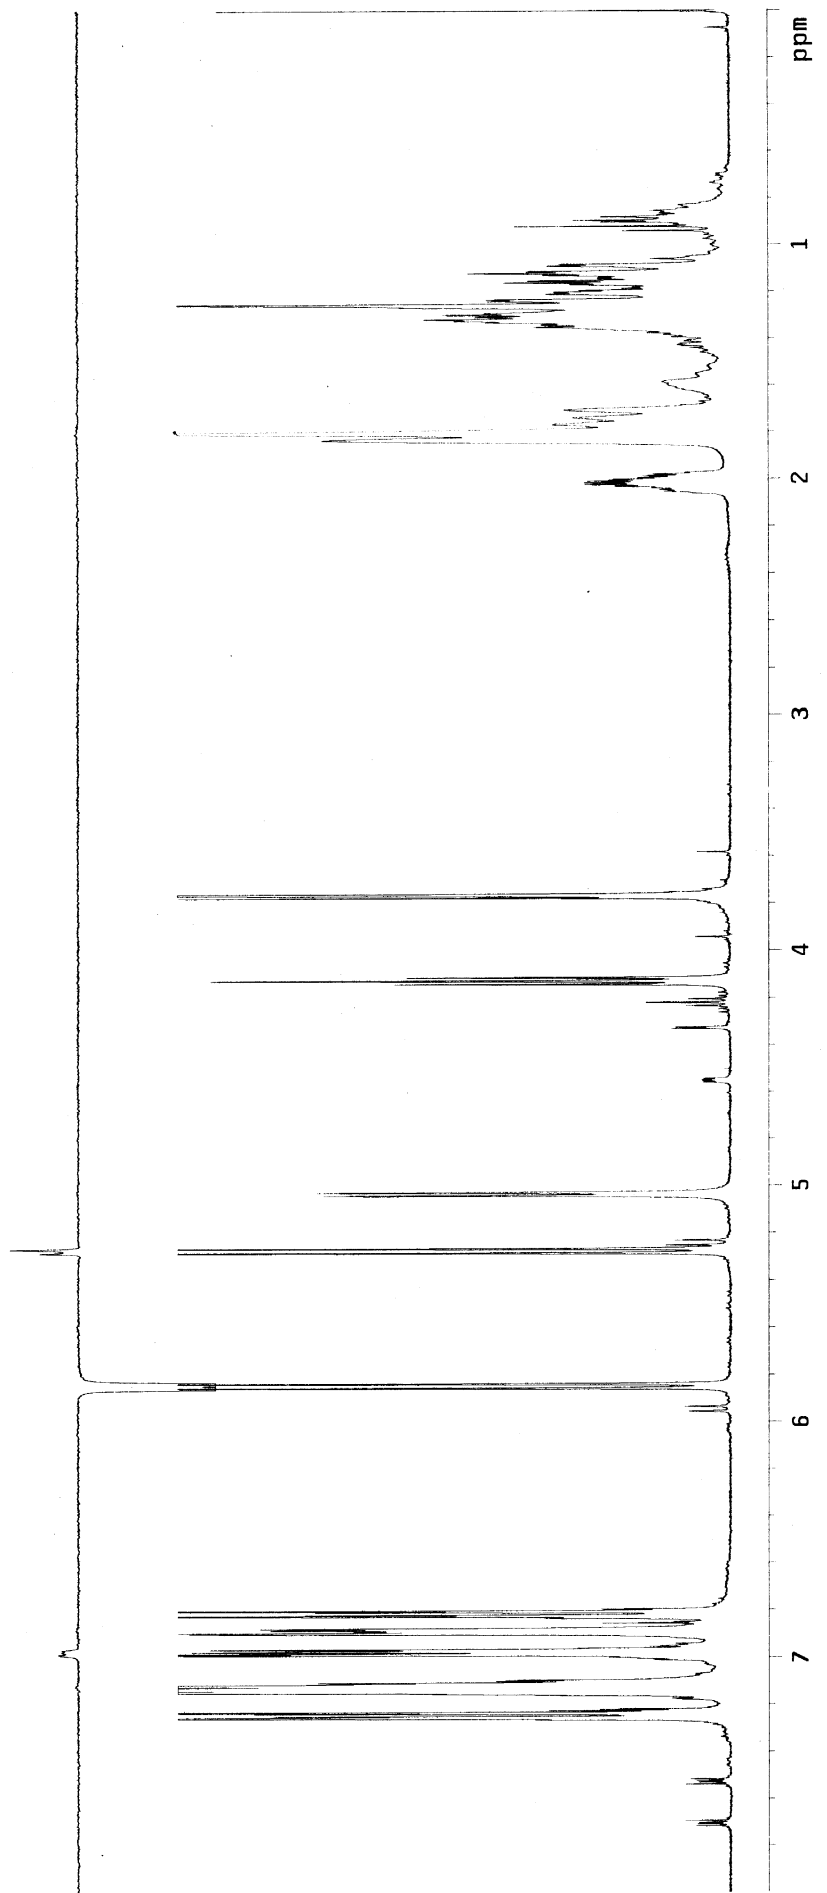

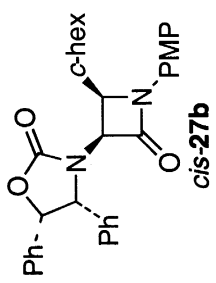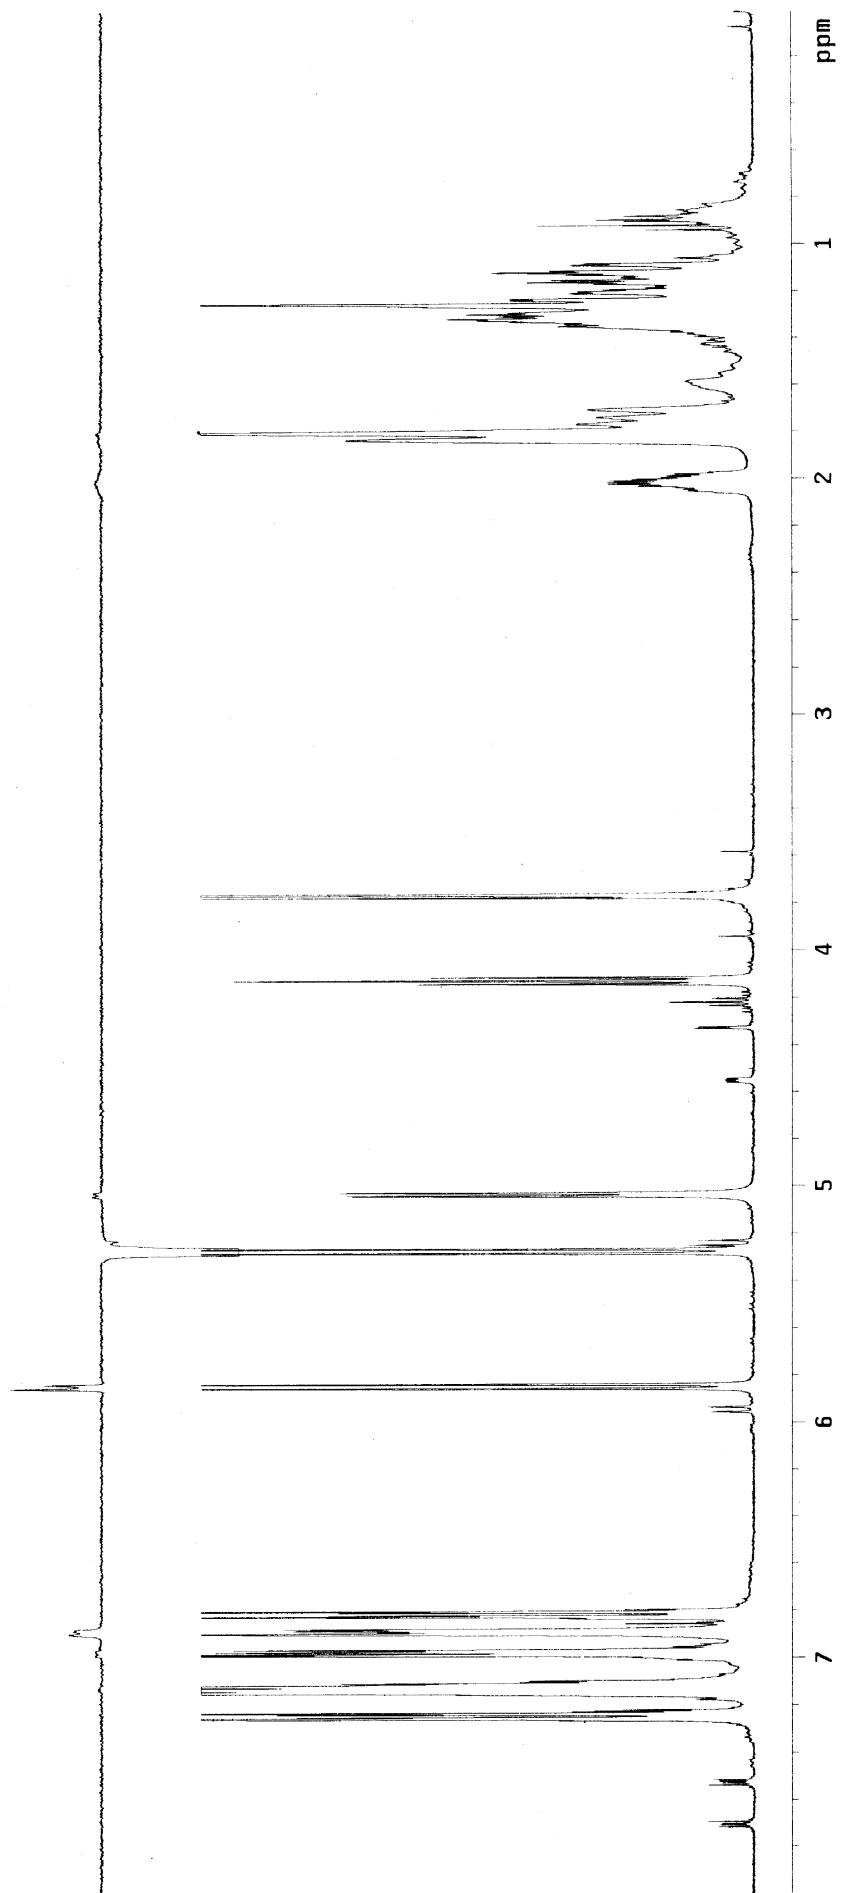

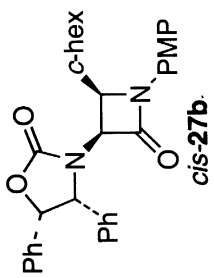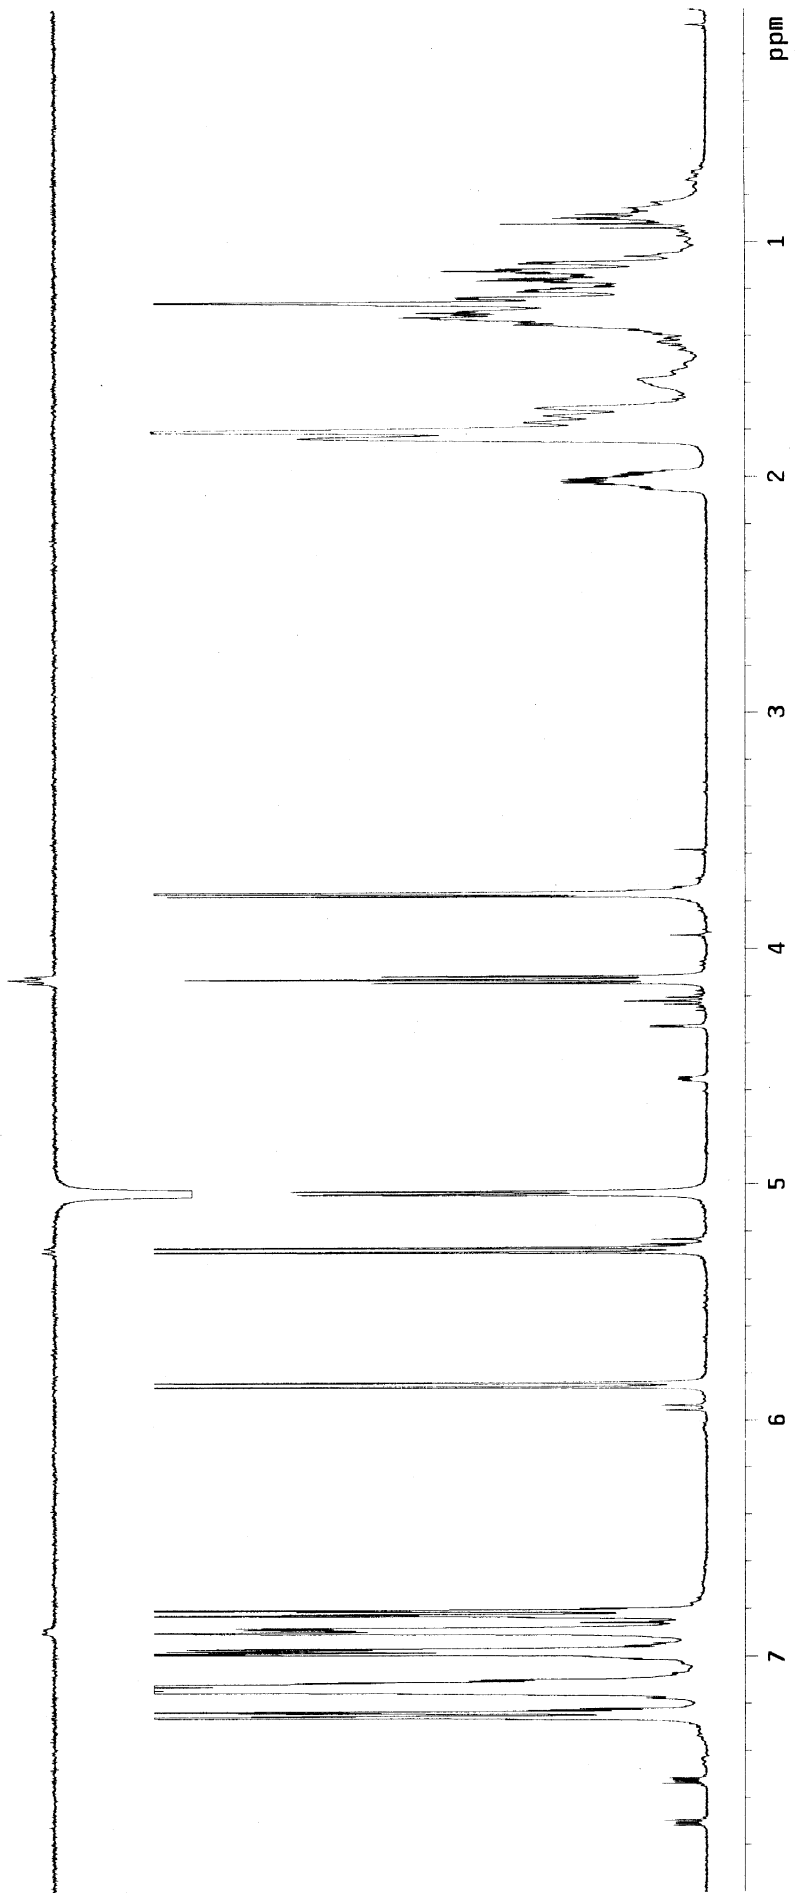

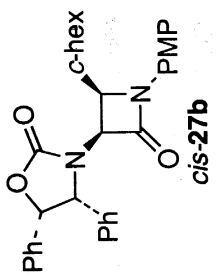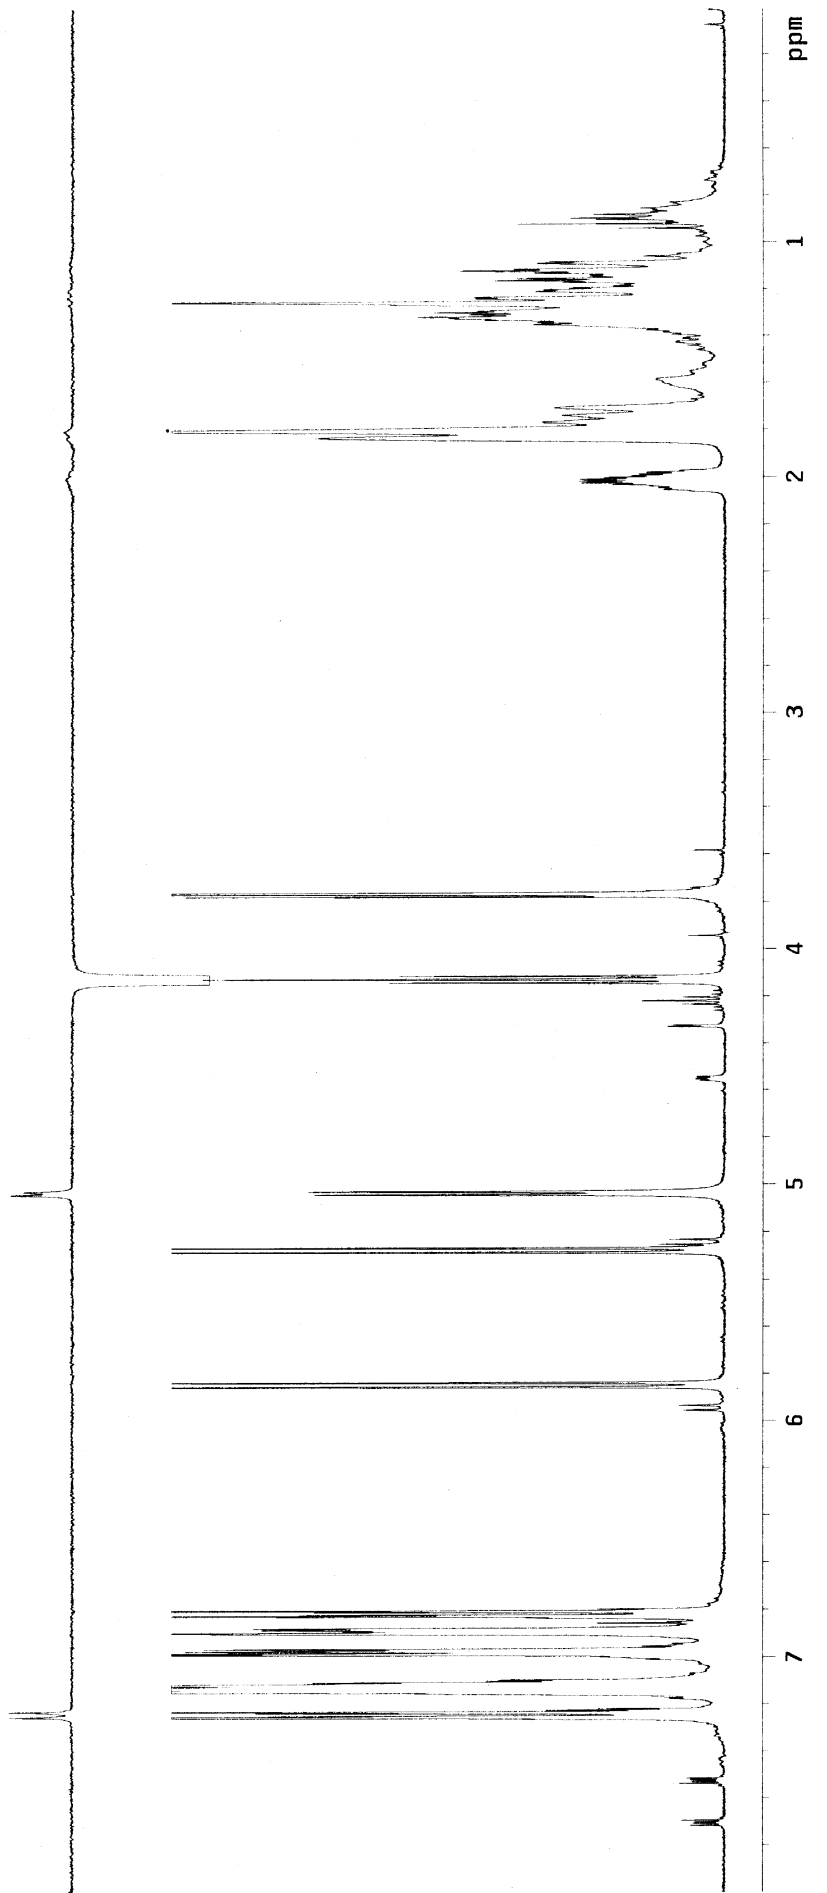

# Cosy and NOE Experiment of Compound

## *trans*-27b

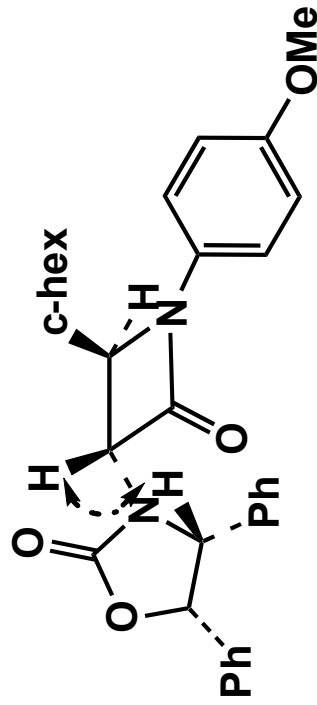

nOe of *trans*-27b



COSY  
400 MHz, CDCl<sub>3</sub>

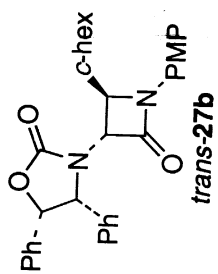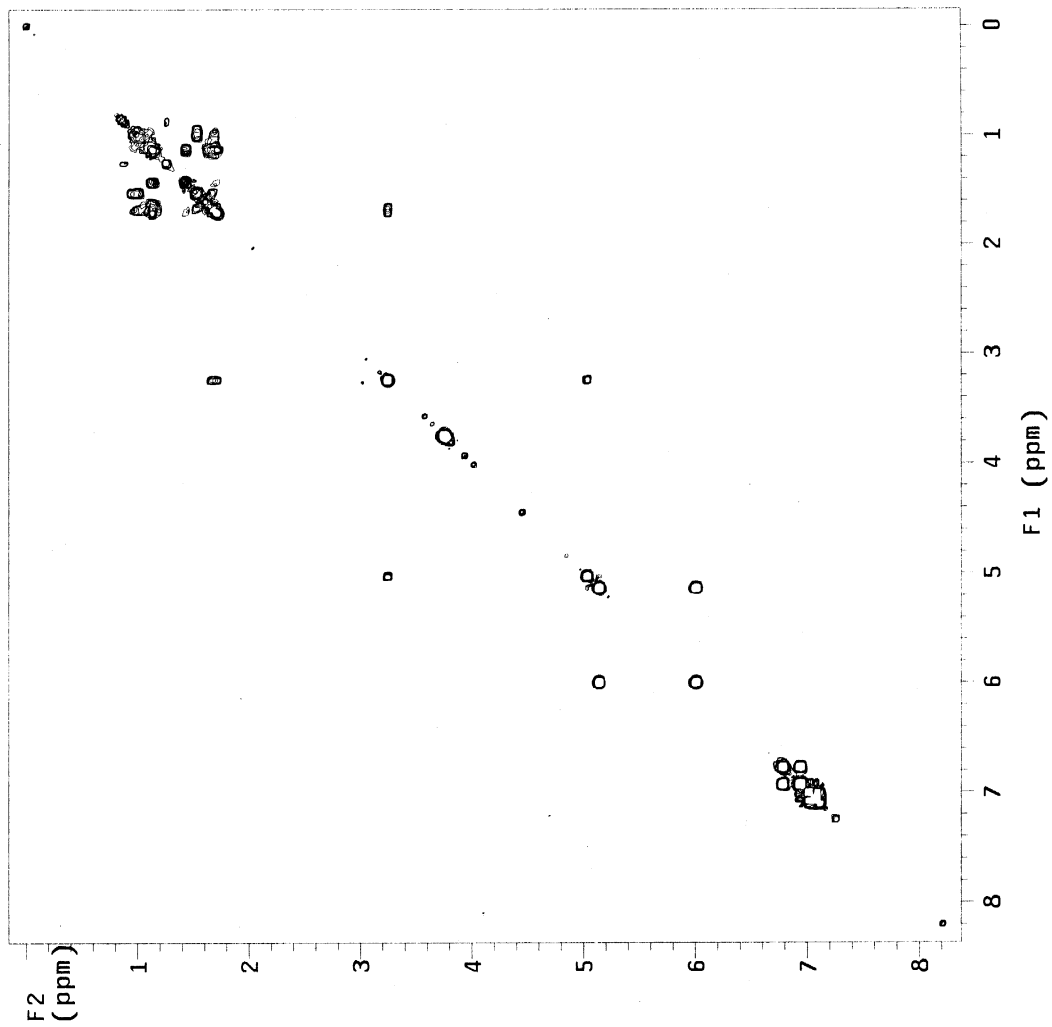

NOE  
500 MHz, CDCl<sub>3</sub>

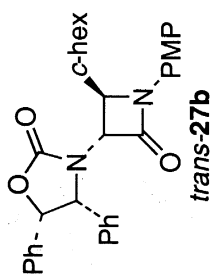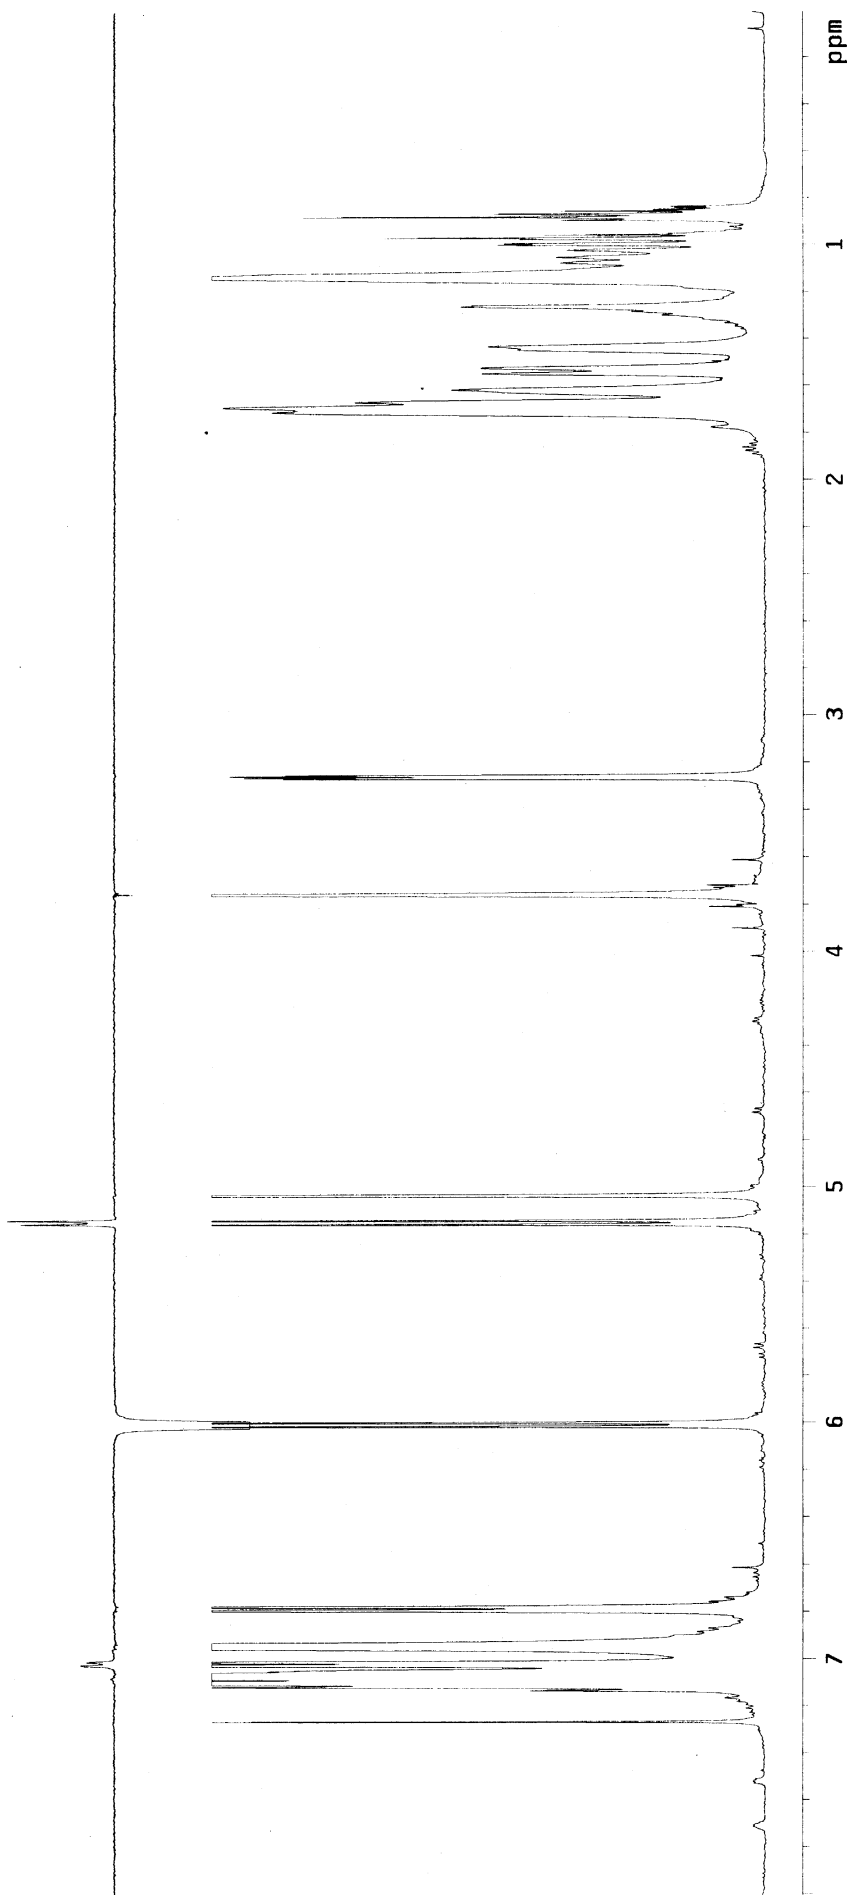

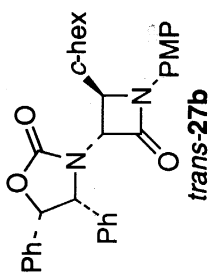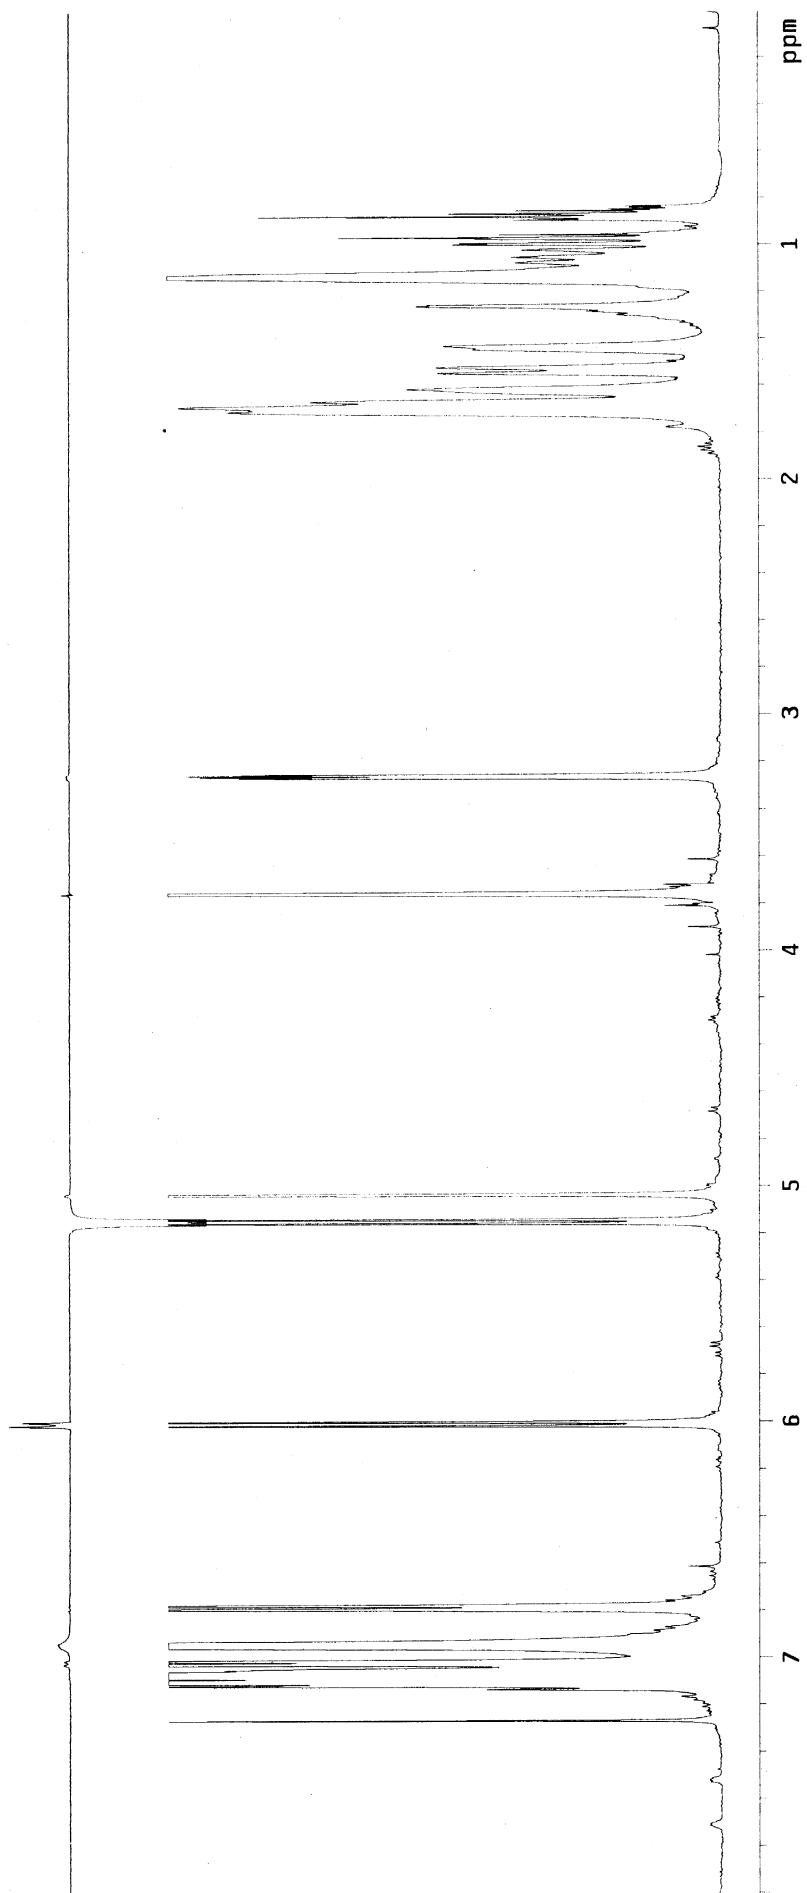

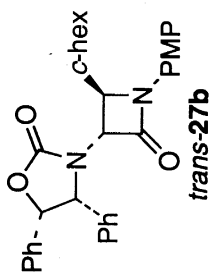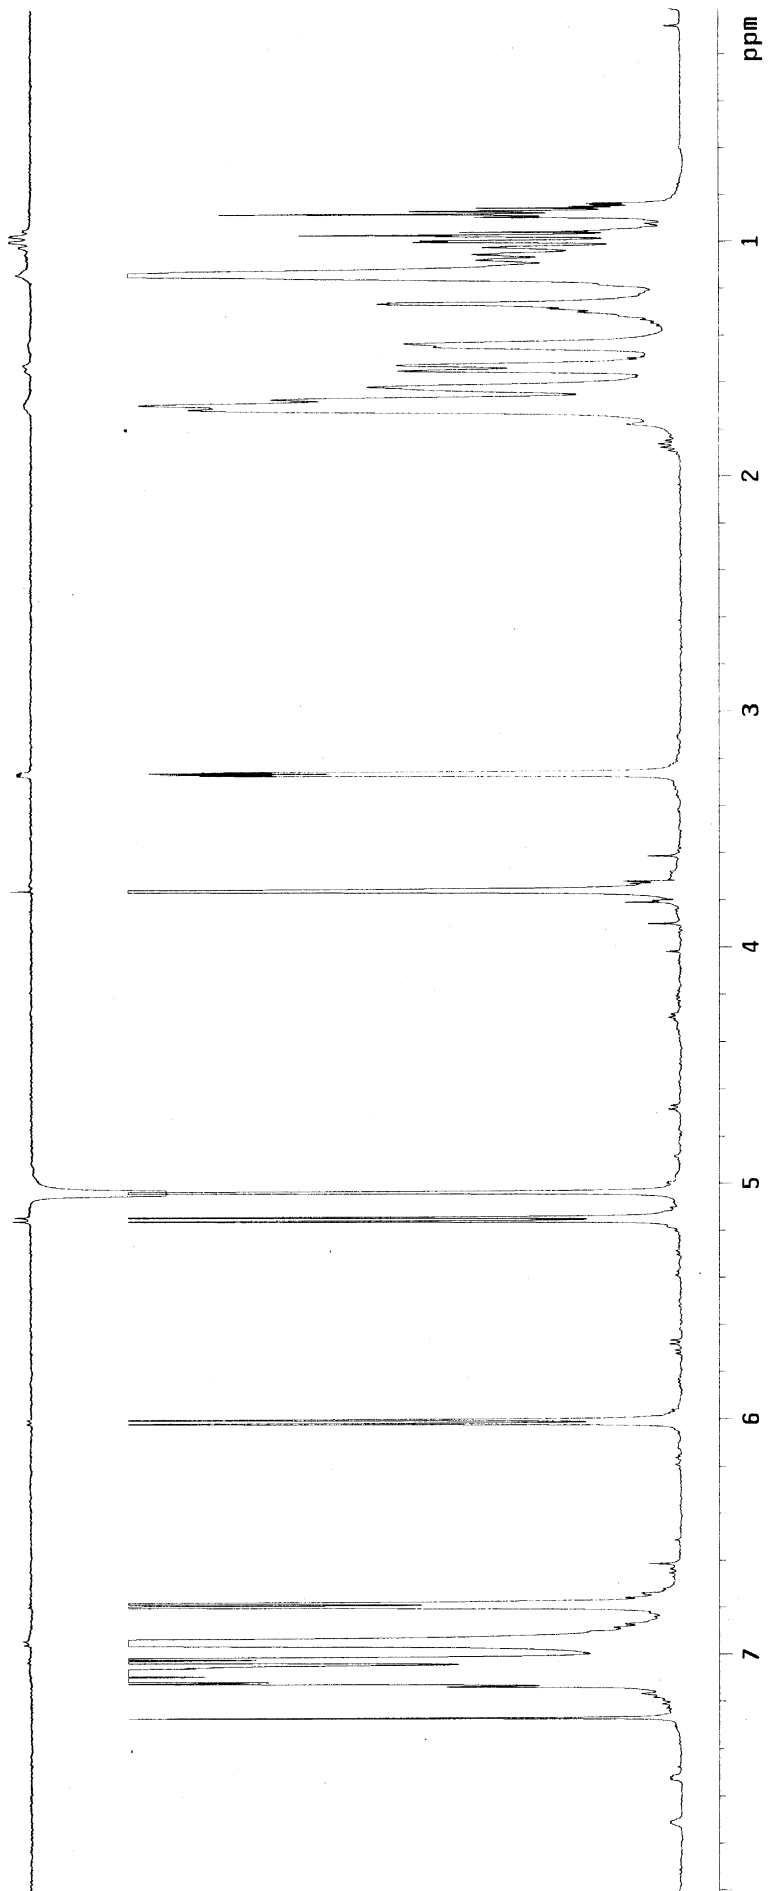

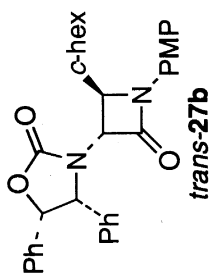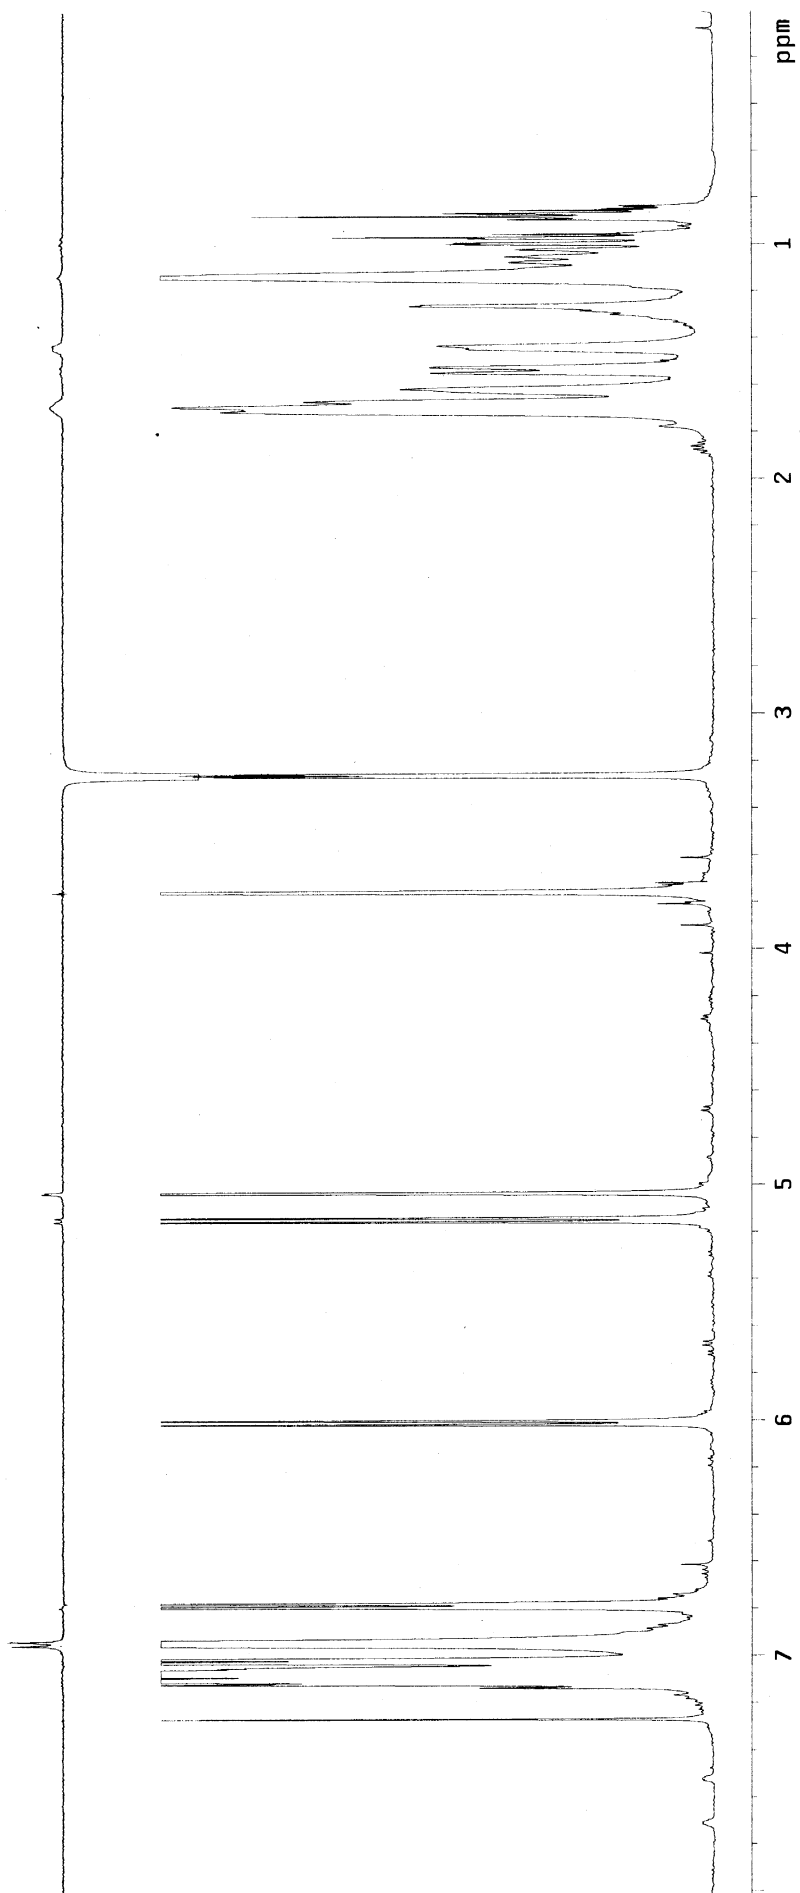

Supplement: NIHMS56594-supplement-3.pdf [file NIHMS56594-supplement-3.pdf]
